# Supplementary material
Source: PubMed Central journal article supplement (PMC3615722)

## Supporting Information For: Wacker-Type Oxidation of Internal Alkenes using Pd(Quinox) and TBHP

Ryan J. DeLuca,<sup>†</sup> Jennifer L. Edwards,<sup>†</sup> Laura D. Steffens,<sup>†</sup> Brian W. Michel,<sup>†</sup> Xiaoxiao Qiao,<sup>‡</sup> Chunyin Zhu,<sup>‡</sup> Silas P. Cook,<sup>\*,‡</sup> Matthew S. Sigman<sup>\*,†</sup>

<sup>†</sup> *University of Utah, Department of Chemistry, 315 S. 1400 E. Salt Lake City, Utah 84112*

<sup>‡</sup> *Indiana University, Department of Chemistry, 800 E. Kirkwood Ave. Bloomington, IN 47405*

*E-mail: sigman@chem.utah.edu,<sup>†</sup> sicook@indiana.edu.<sup>‡</sup>*

### Table of Contents

|        |                                                |
|--------|------------------------------------------------|
| S1     | General Considerations                         |
| S2-S28 | <sup>1</sup> H and <sup>13</sup> C NMR spectra |

### General Considerations:

Dichloromethane for Pd(Quinox)-TBHP Wacker-type reactions was reagent grade and used without further purification. Dry CH<sub>2</sub>Cl<sub>2</sub>, THF, Ether, Toluene, hexanes and acetonitrile were dried by passing through a column of activated alumina. Triethylamine (TEA) was distilled from CaH<sub>2</sub> for ligand and substrate synthesis. Unless otherwise noted all chemicals were purchased and used without further purification. *All silver salts were stored in a nitrogen filled glove box and protected from light.* 4-N,N-dimethylaminopyridine (DMAP) was recrystallized from toluene. <sup>1</sup>H-NMR spectra were obtained at 300 MHz, 400 MHz or 500 MHz, chemical shifts are reported in ppm, and referenced to the CHCl<sub>3</sub> singlet at 7.26 ppm. <sup>13</sup>C-NMR spectra were obtained at 75MHz, 100 MHz or 126 MHz and referenced to the center peak of the CHCl<sub>3</sub> at 77.23 ppm. **ALTHOUGH NO PROBLEMS OCCURRED DURING THESE STUDIES, HIGHLY CONCENTRATED SOLUTIONS OF TBHP IN THE PRESENCE OF TRANSITION METALS CAN BE DANGEROUS.**

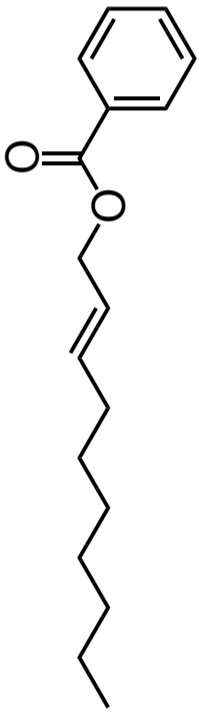

**8e**

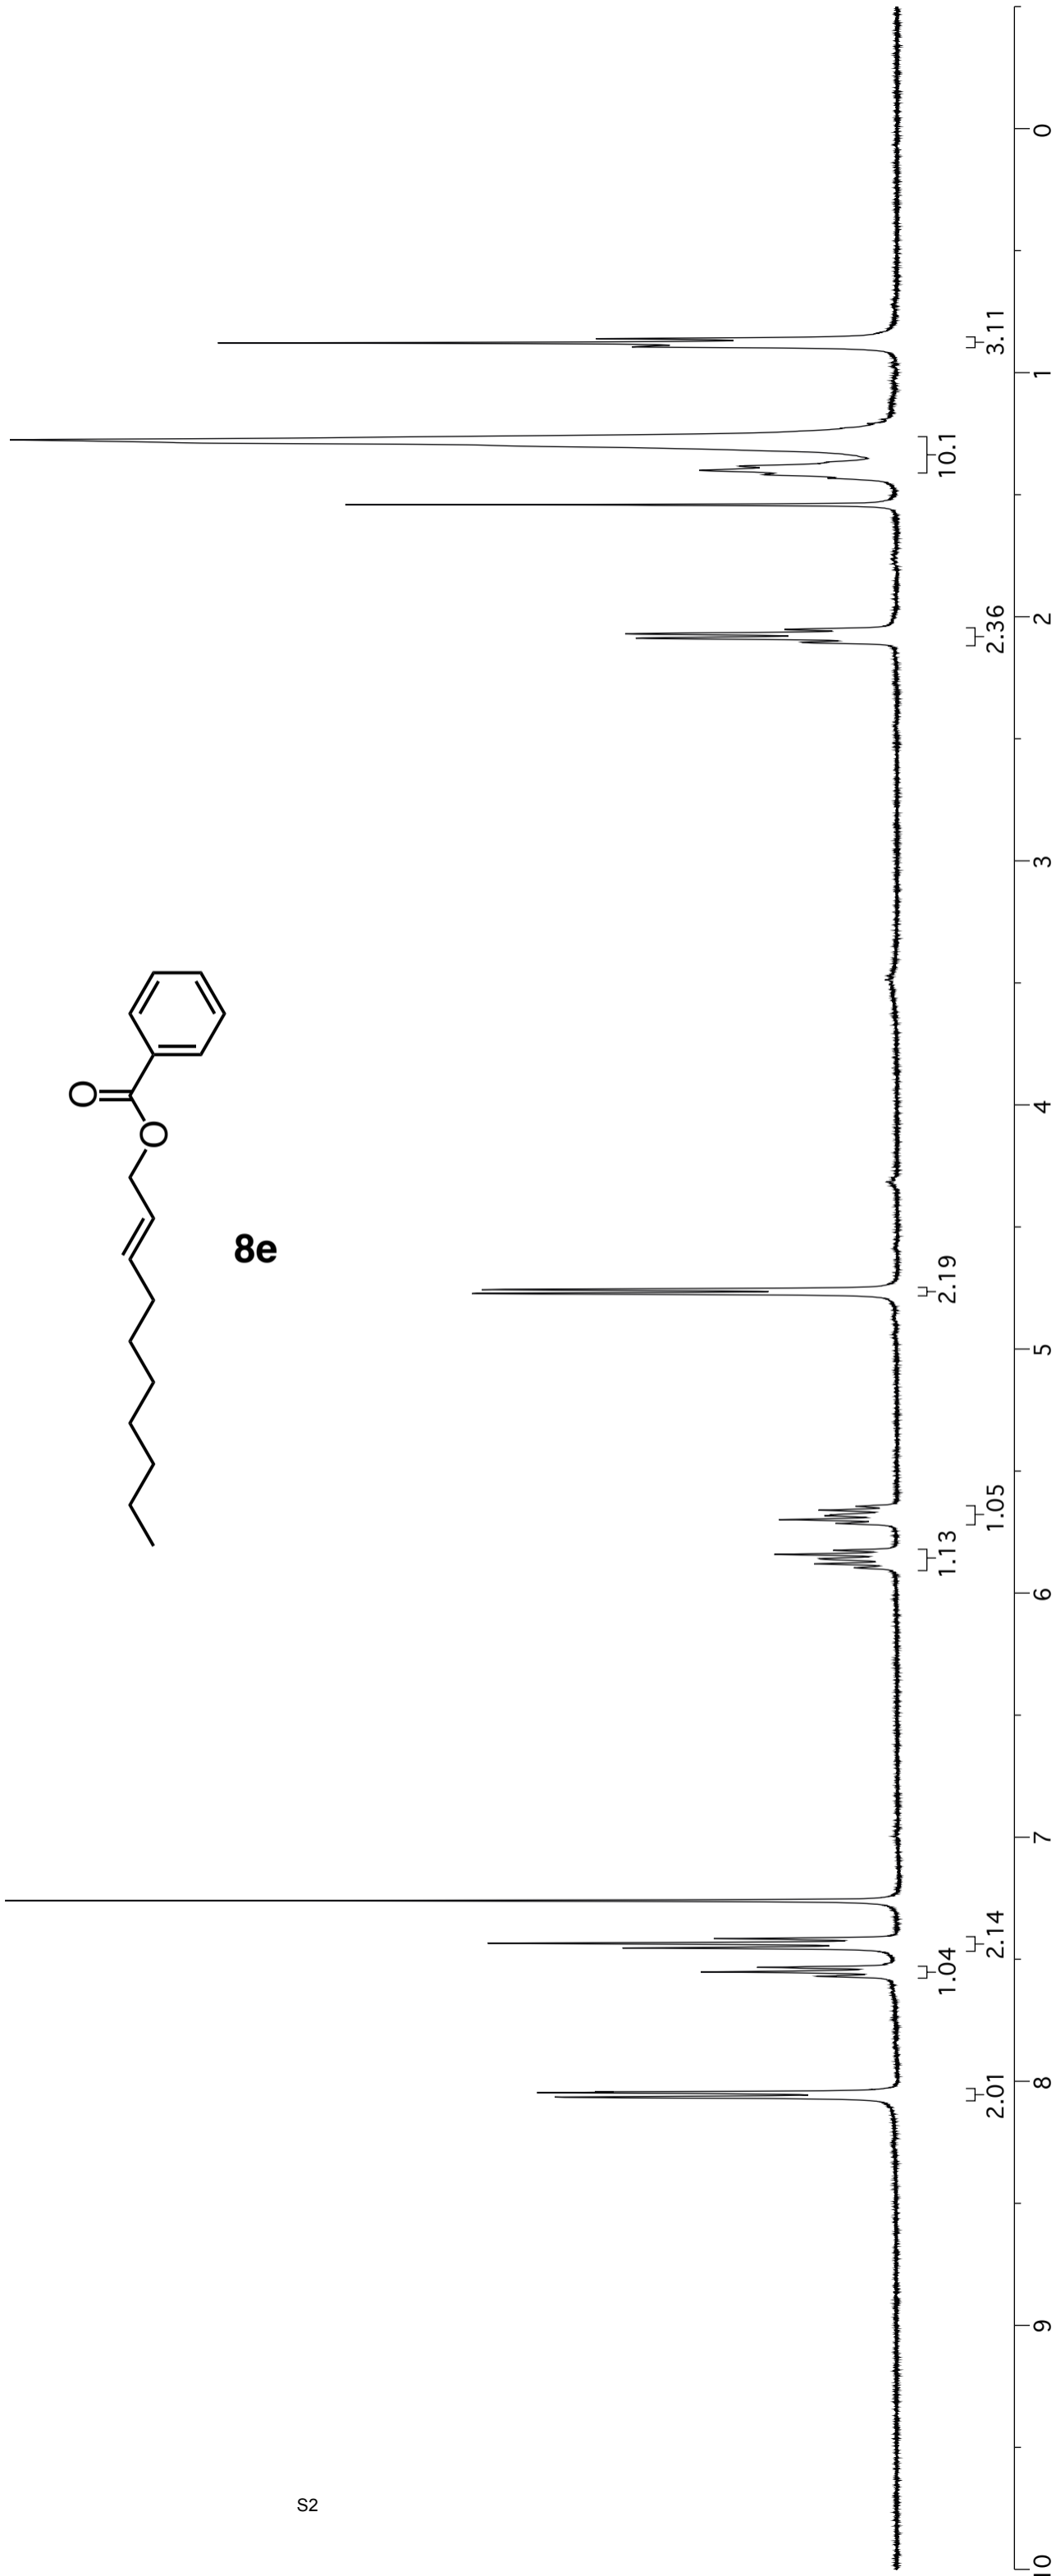

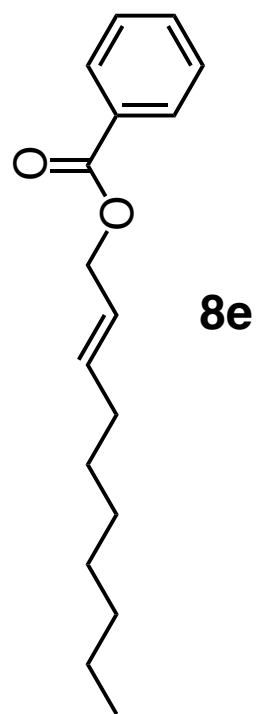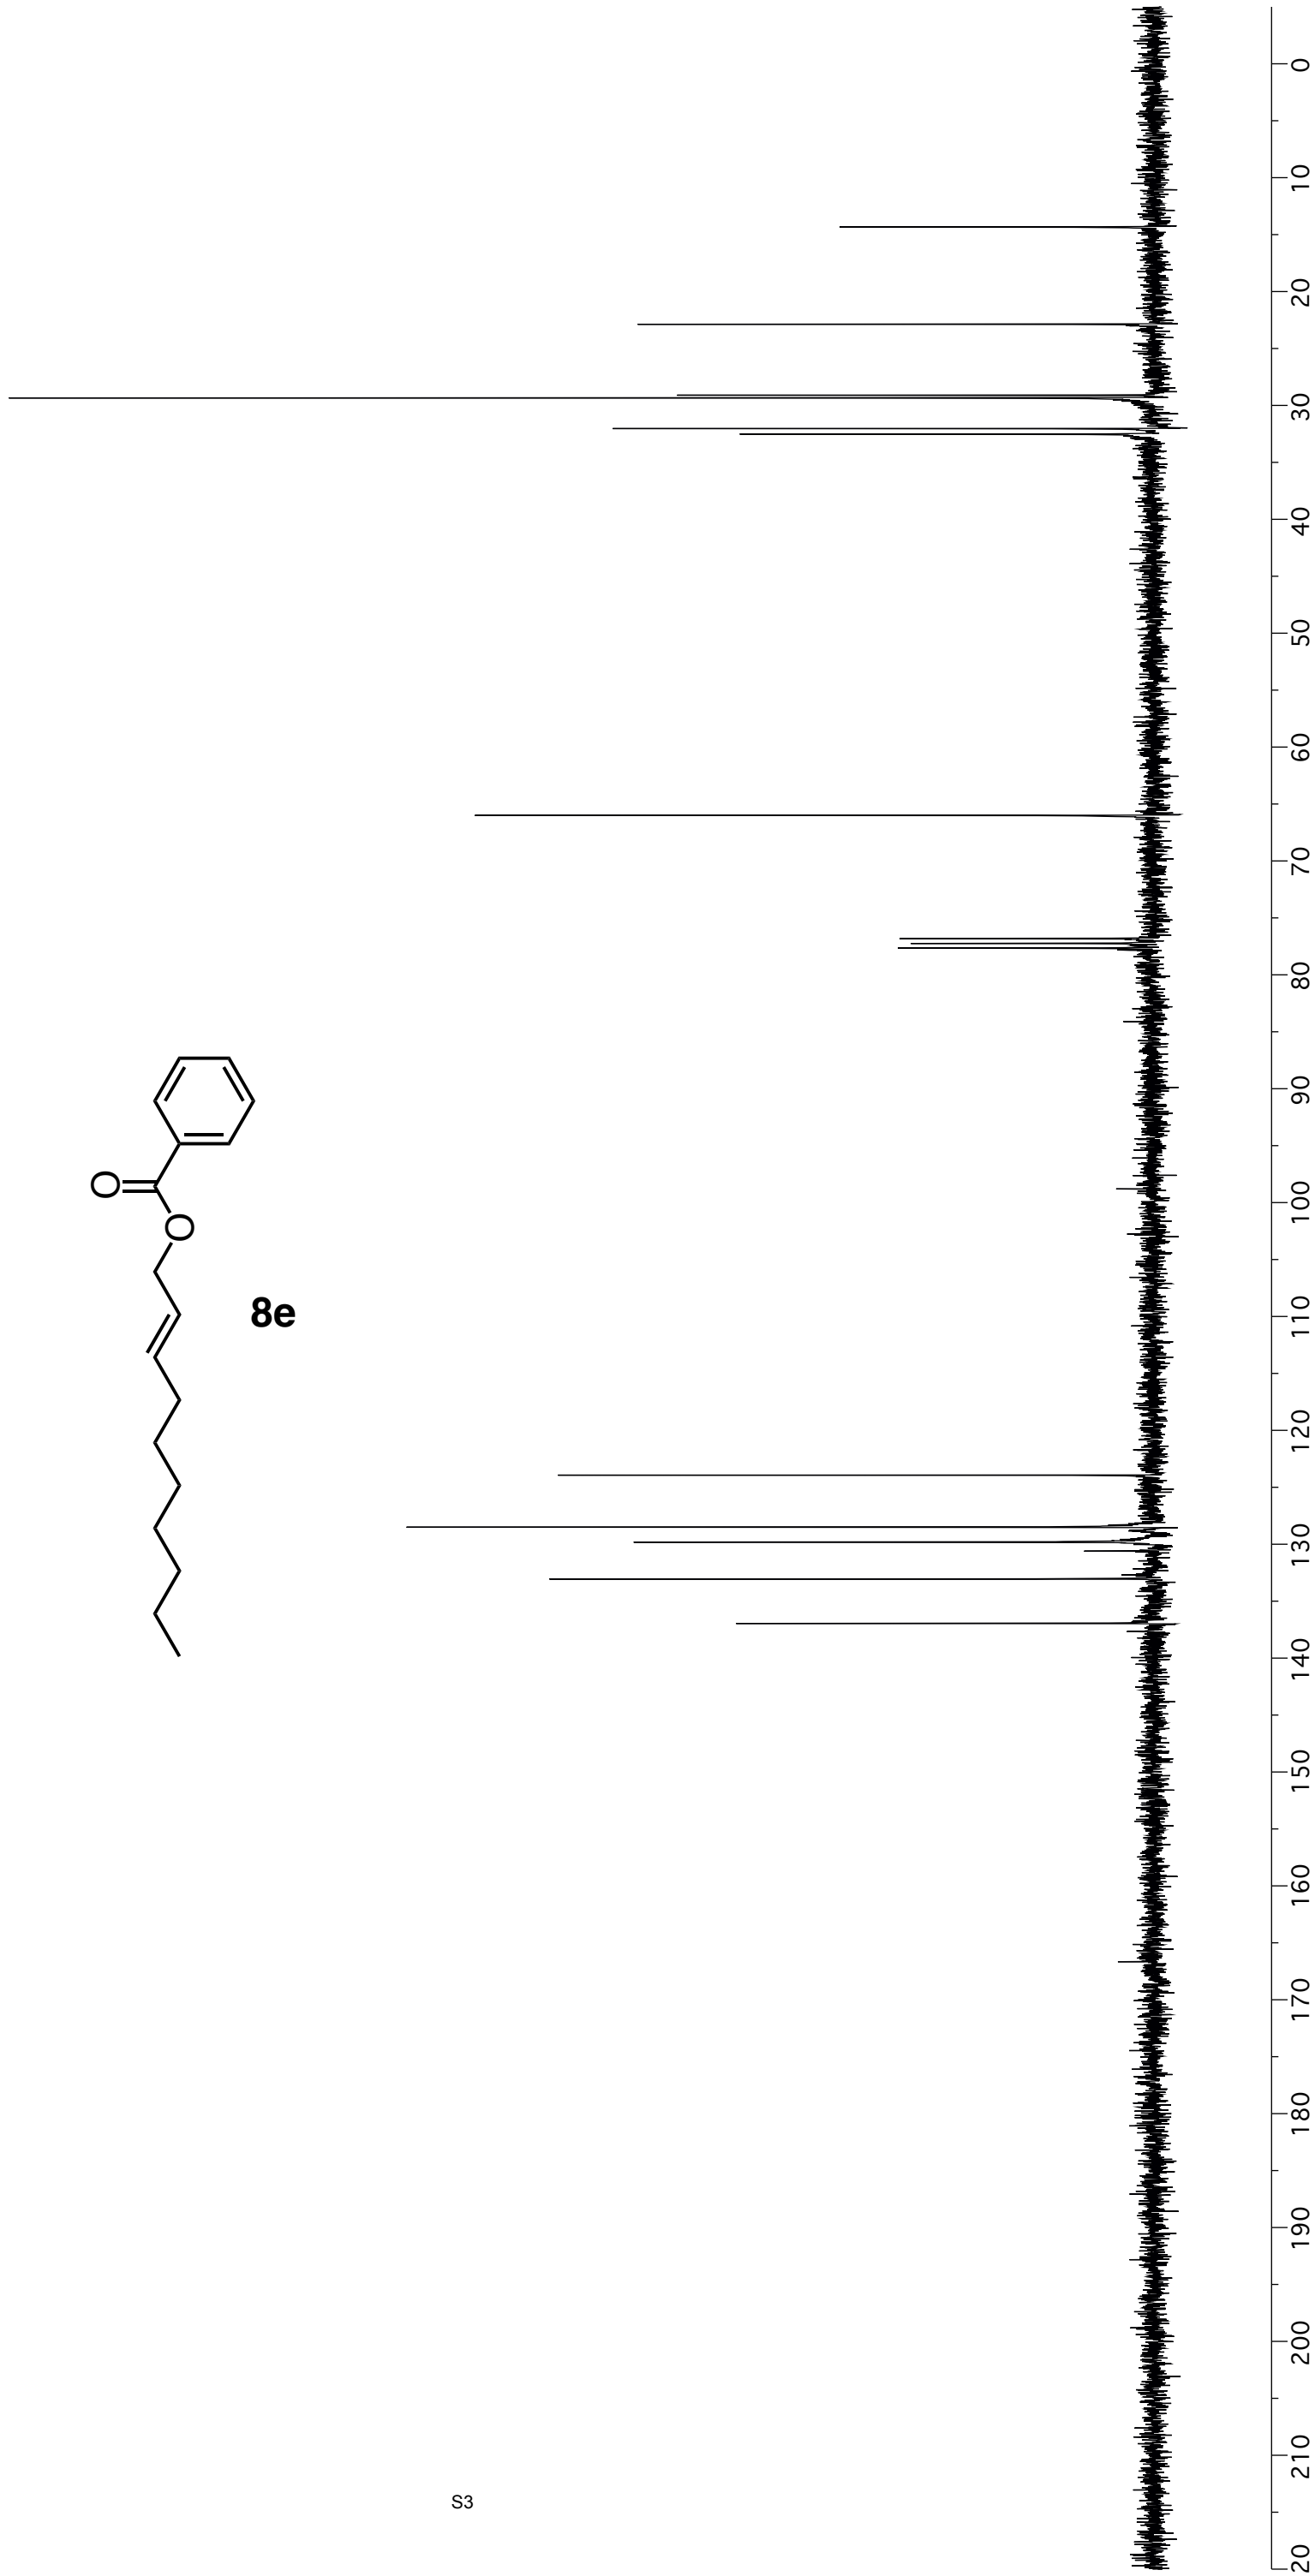

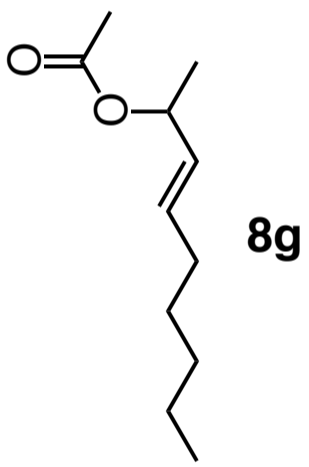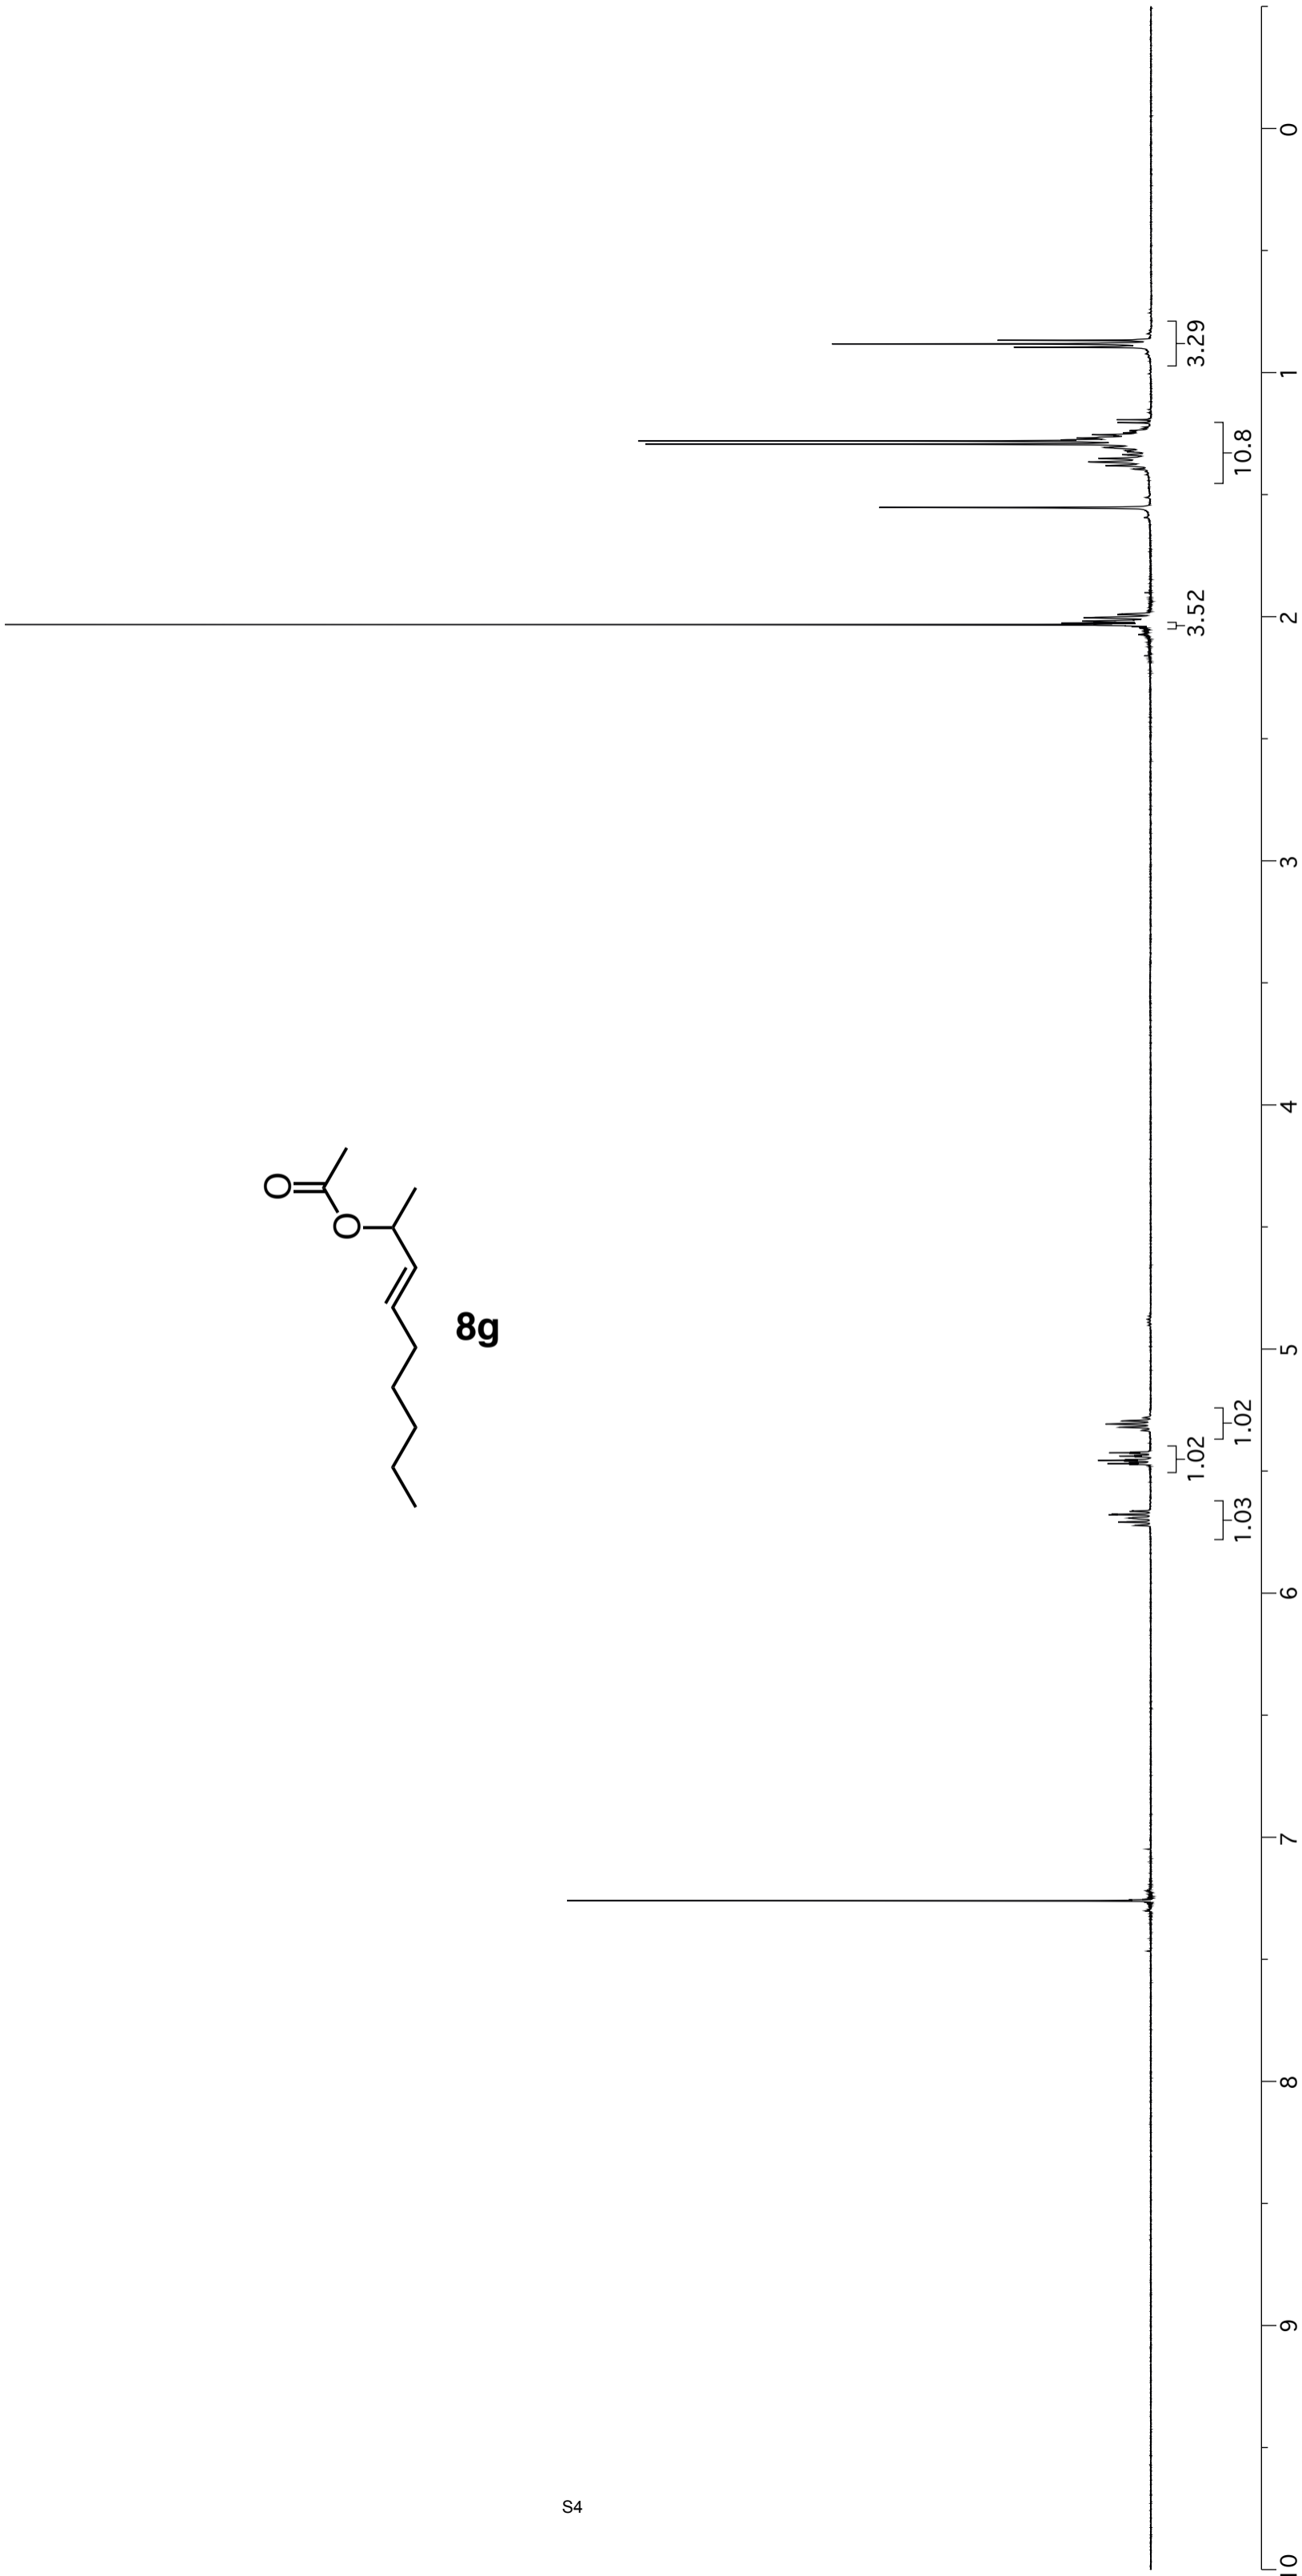

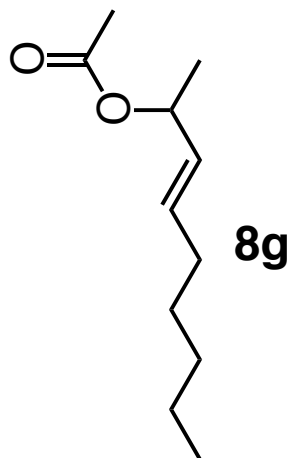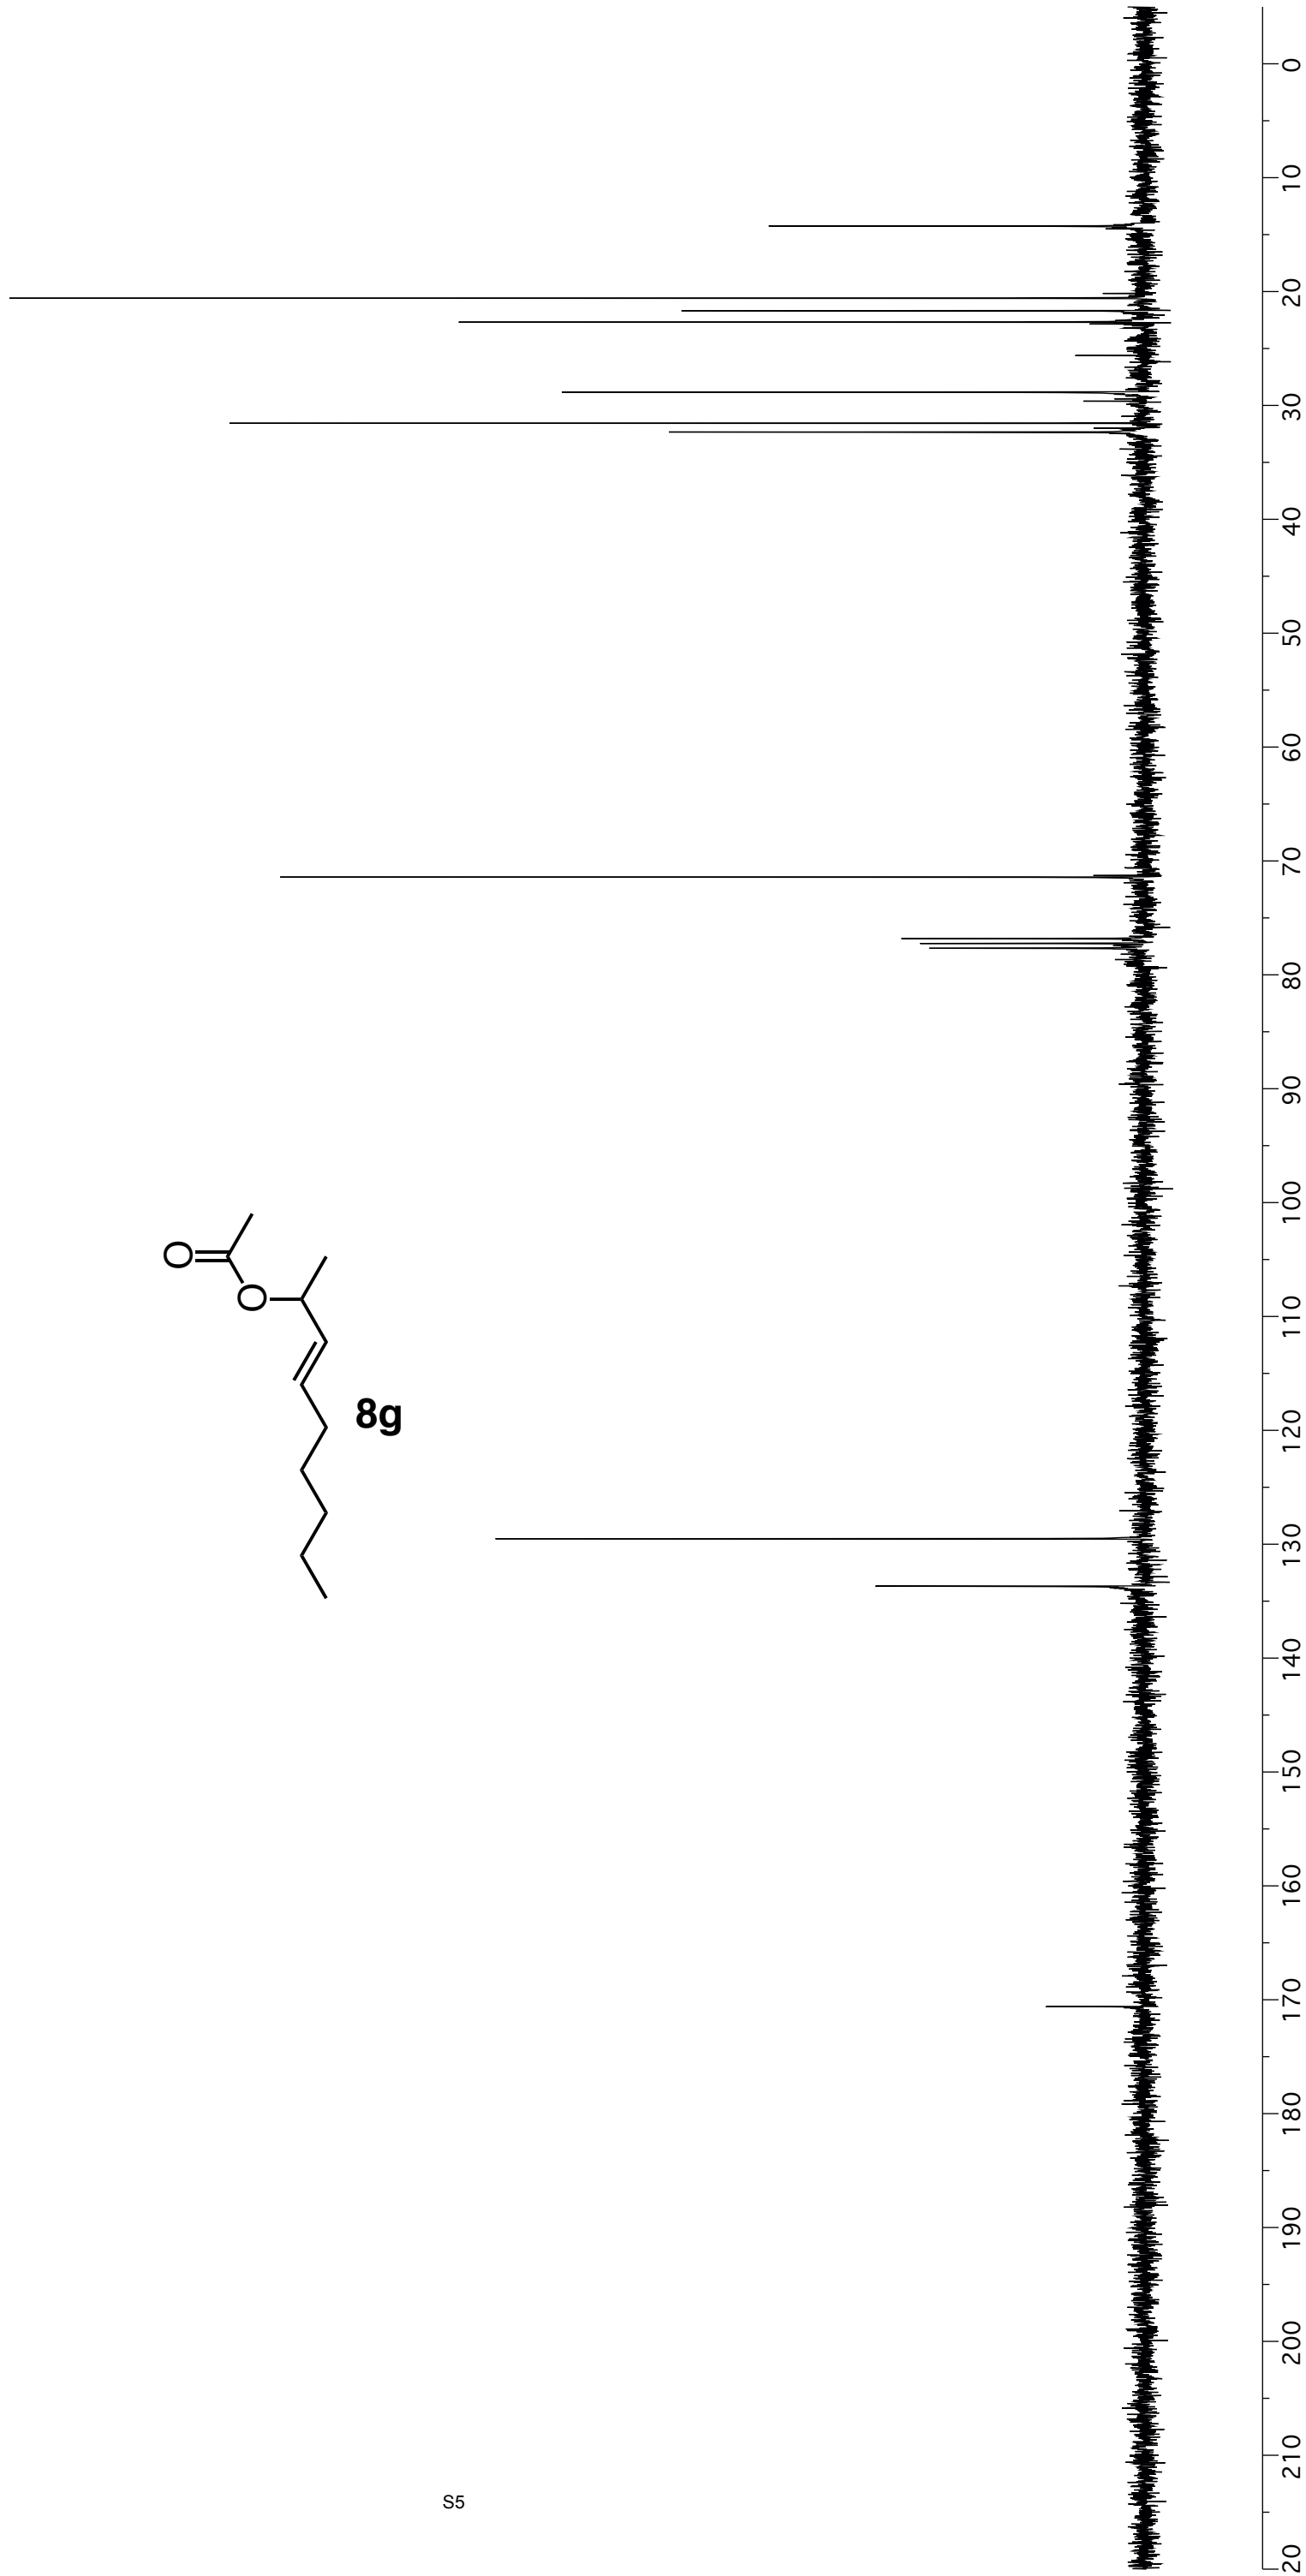

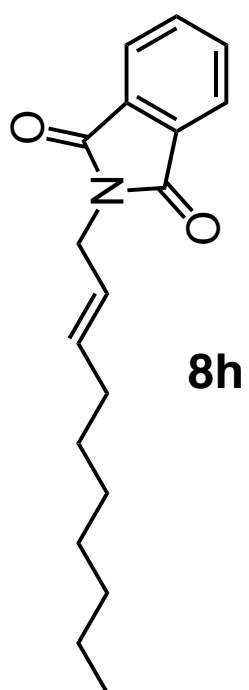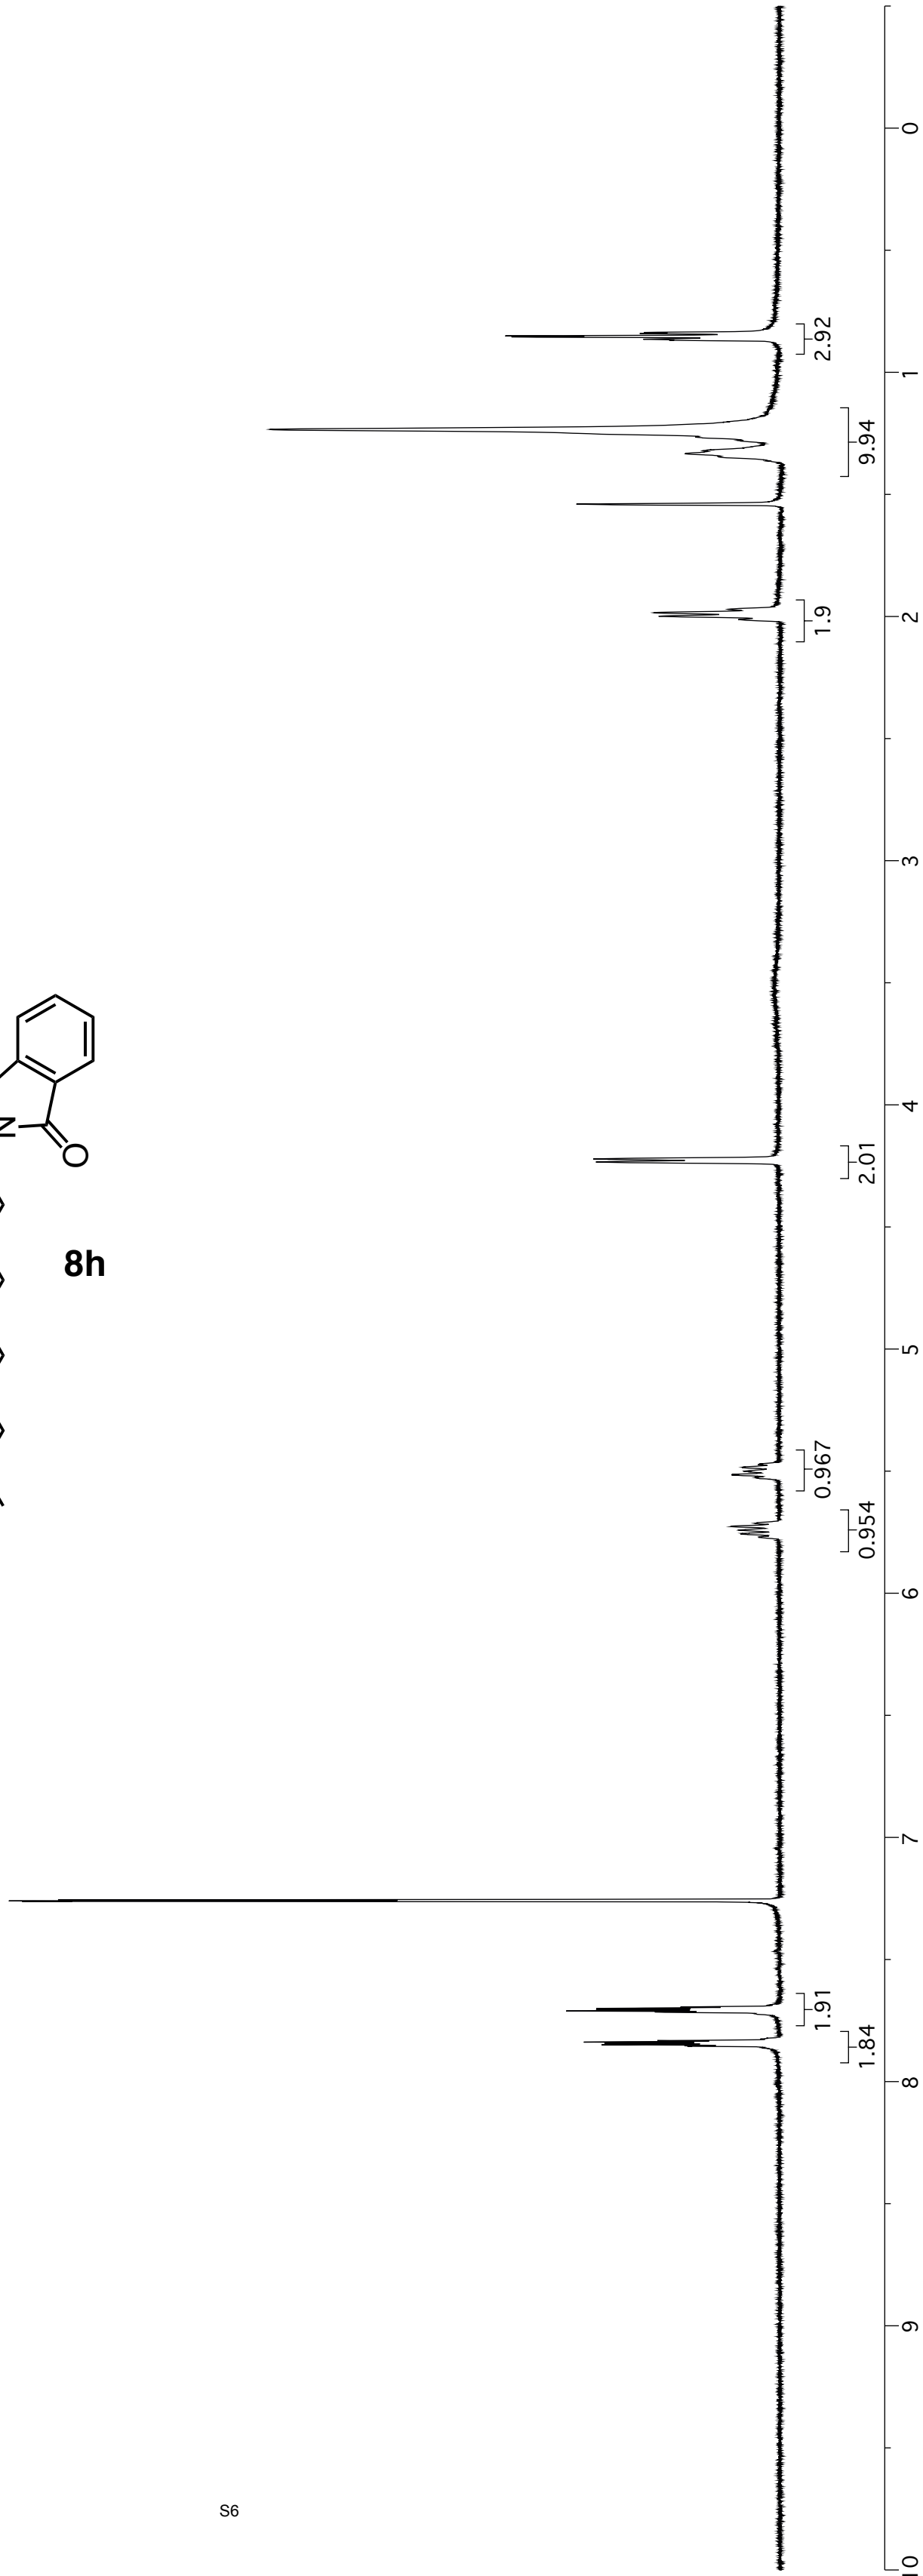

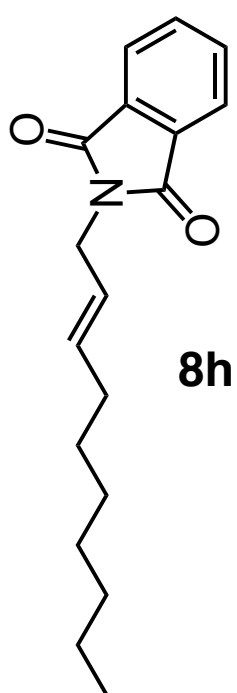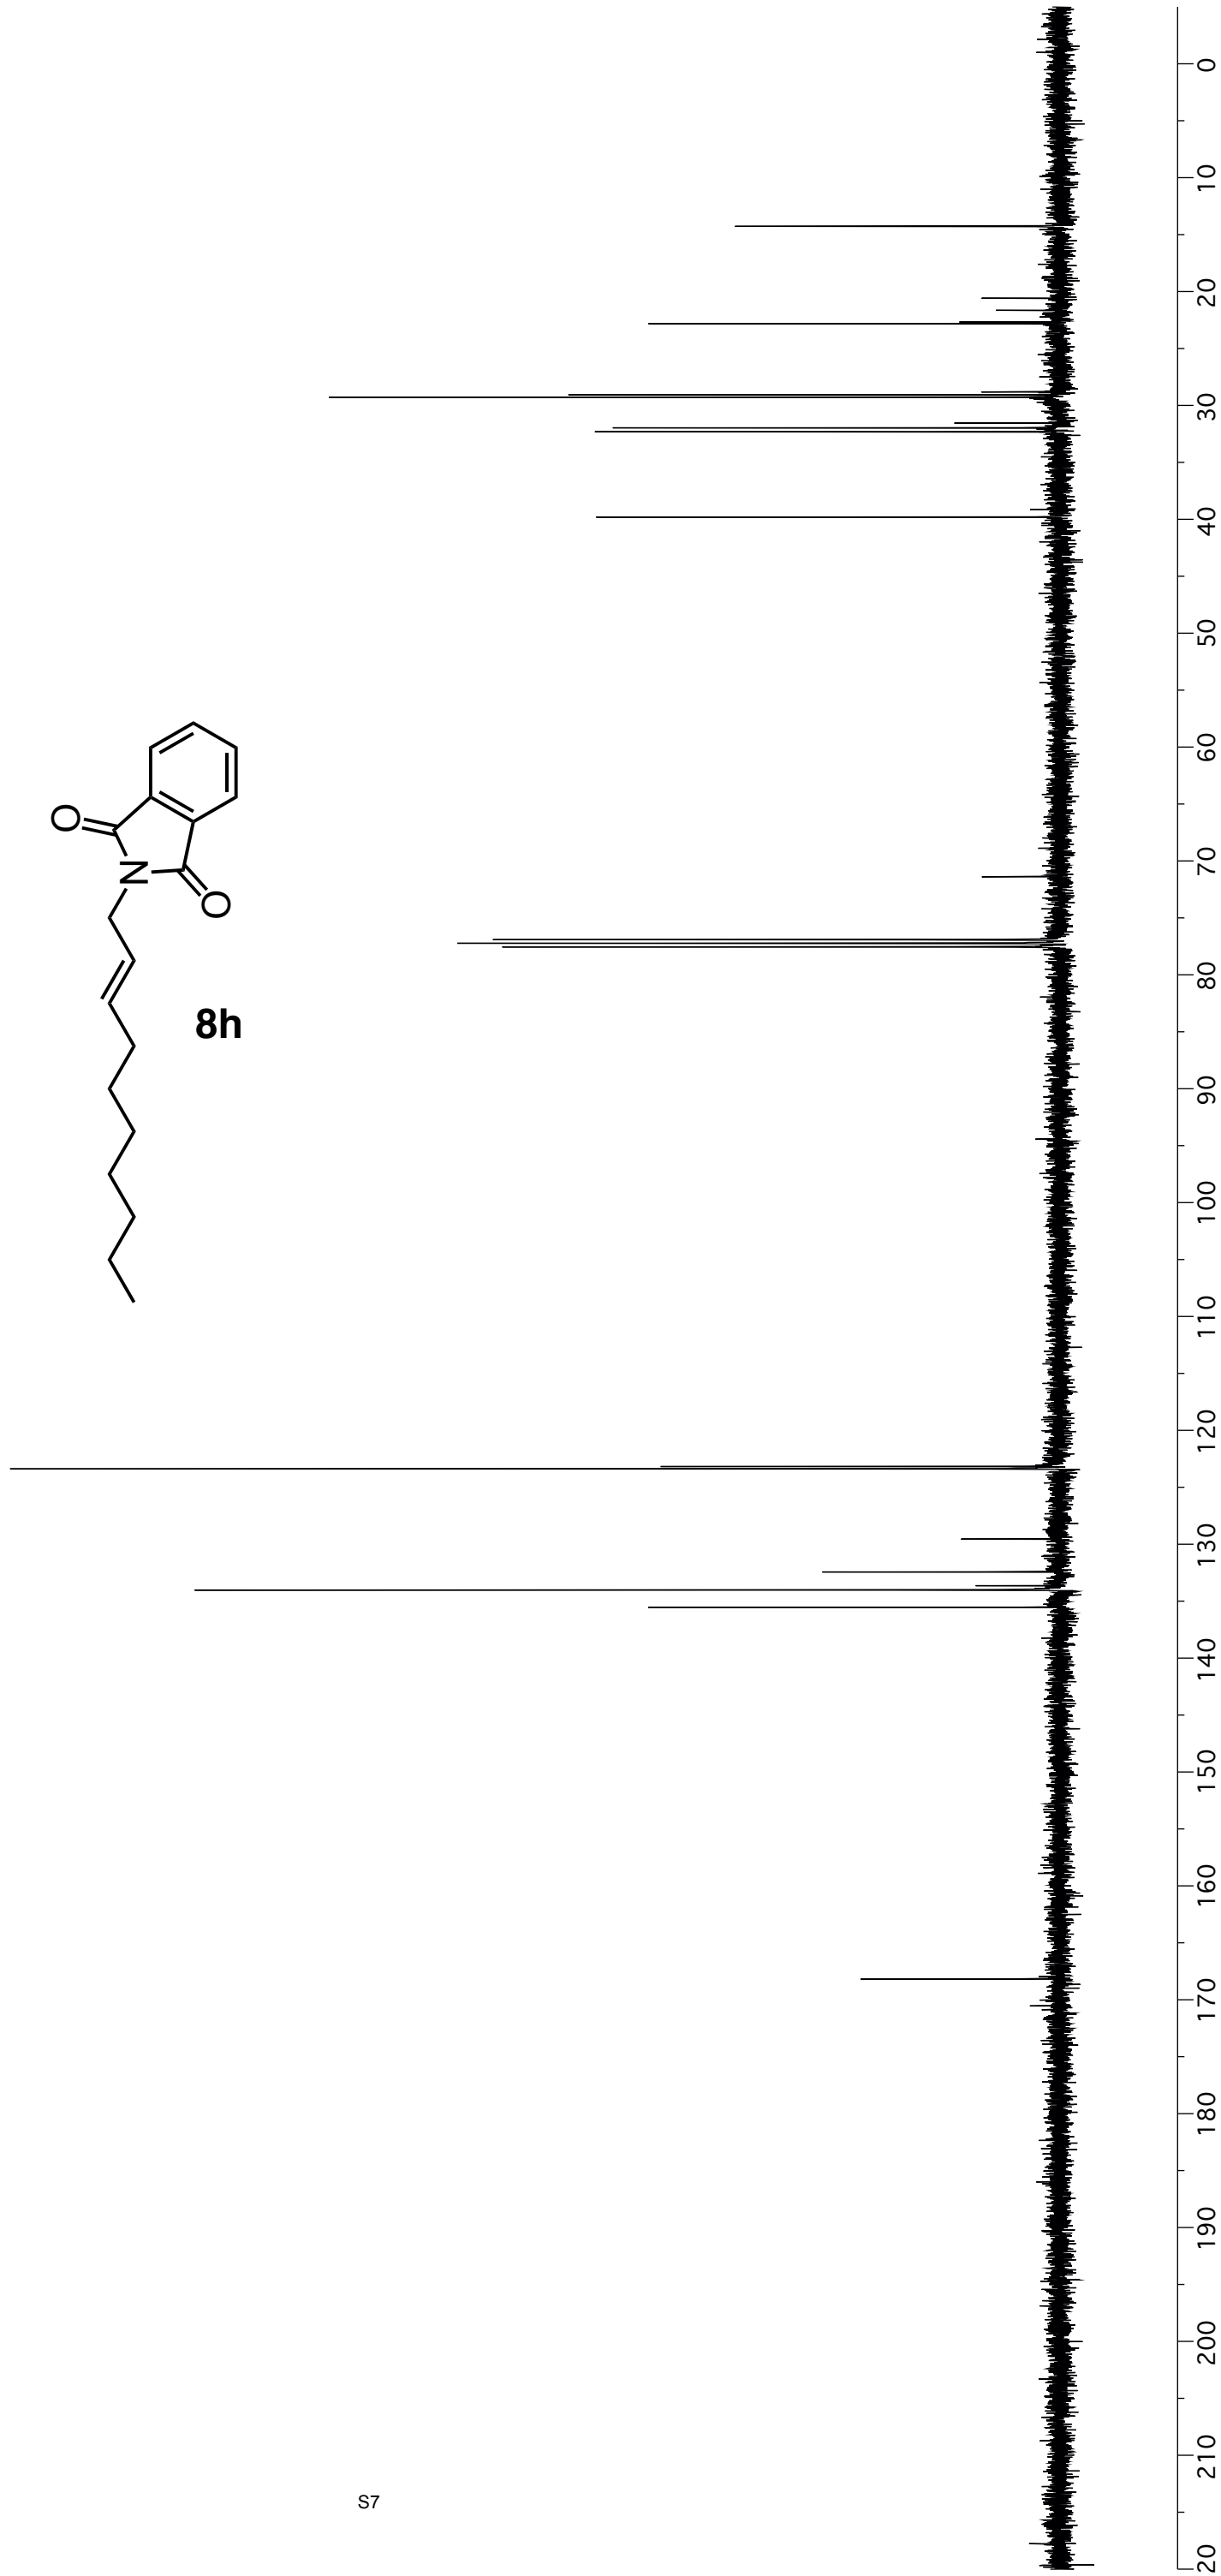

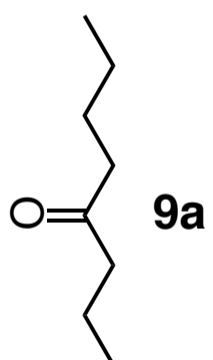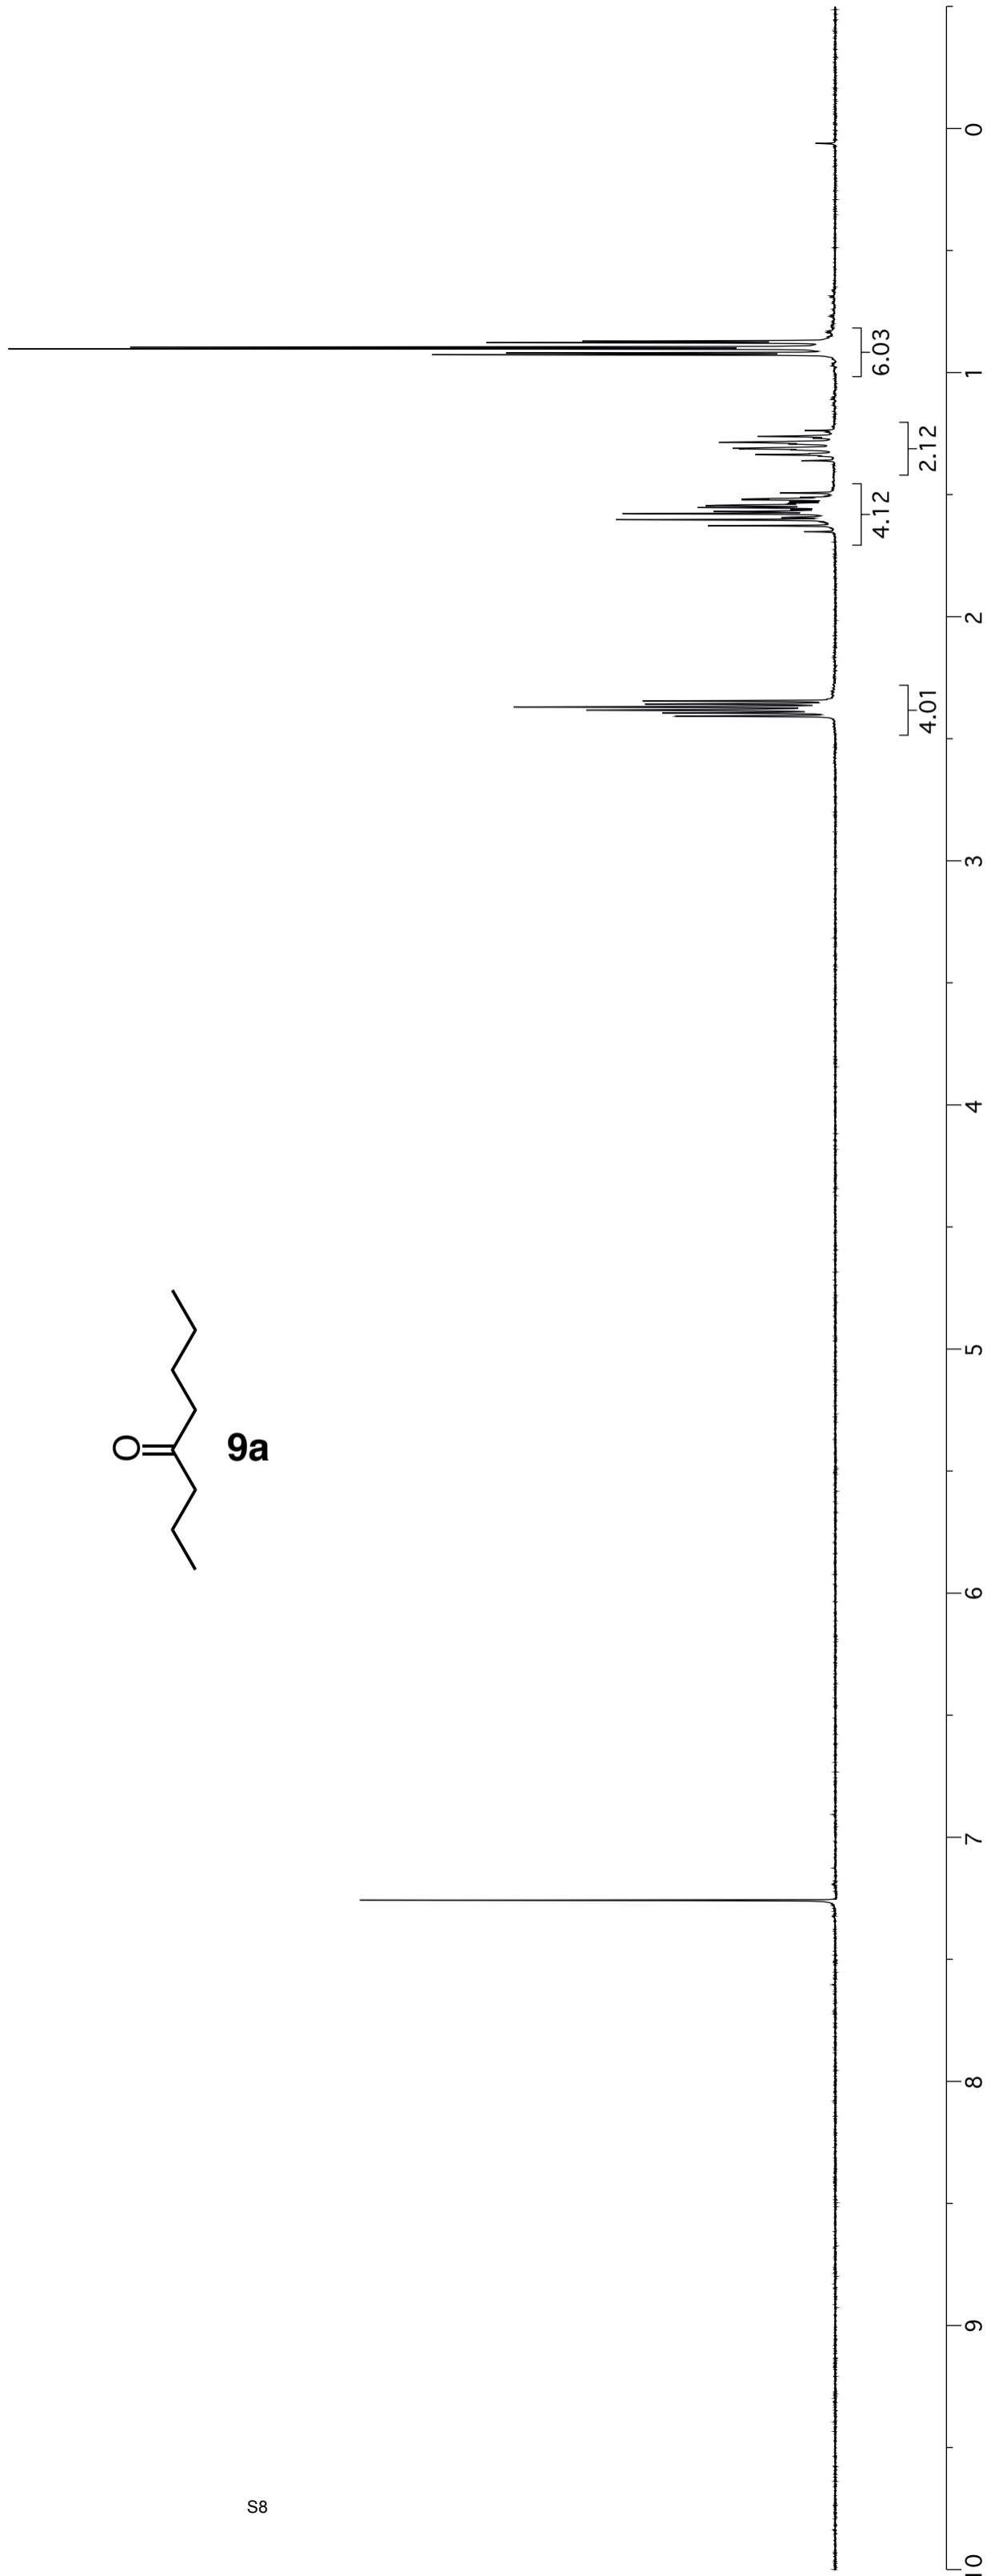



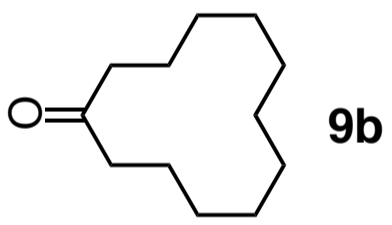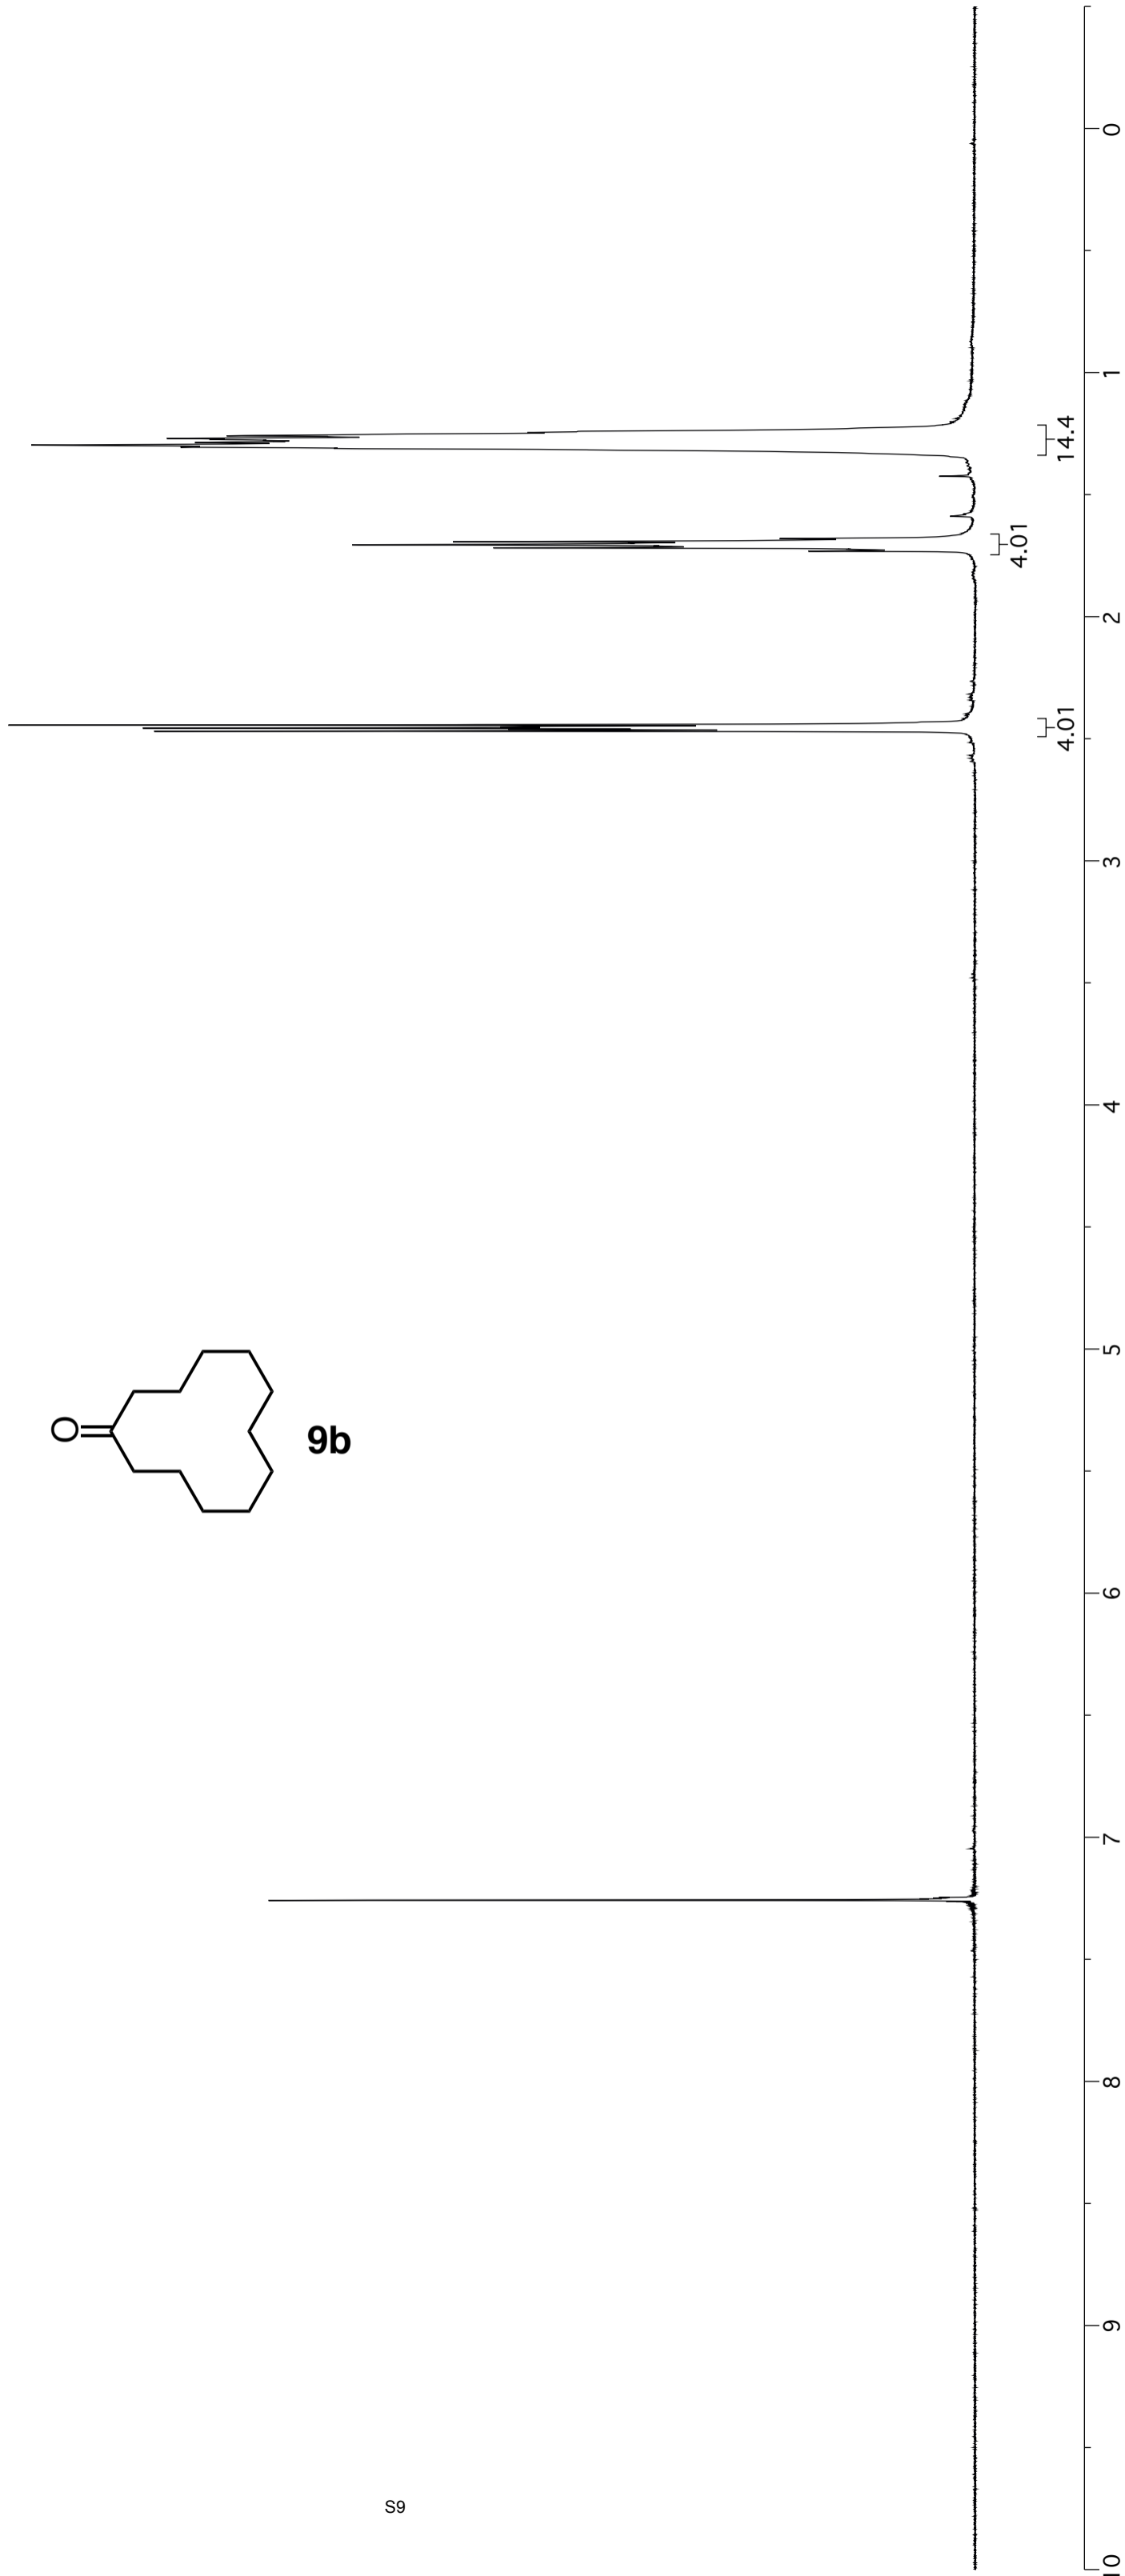

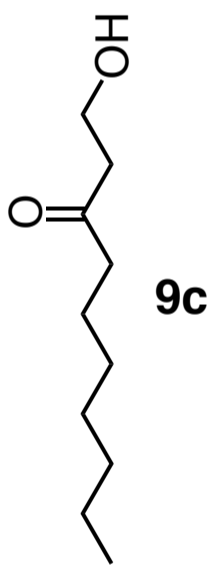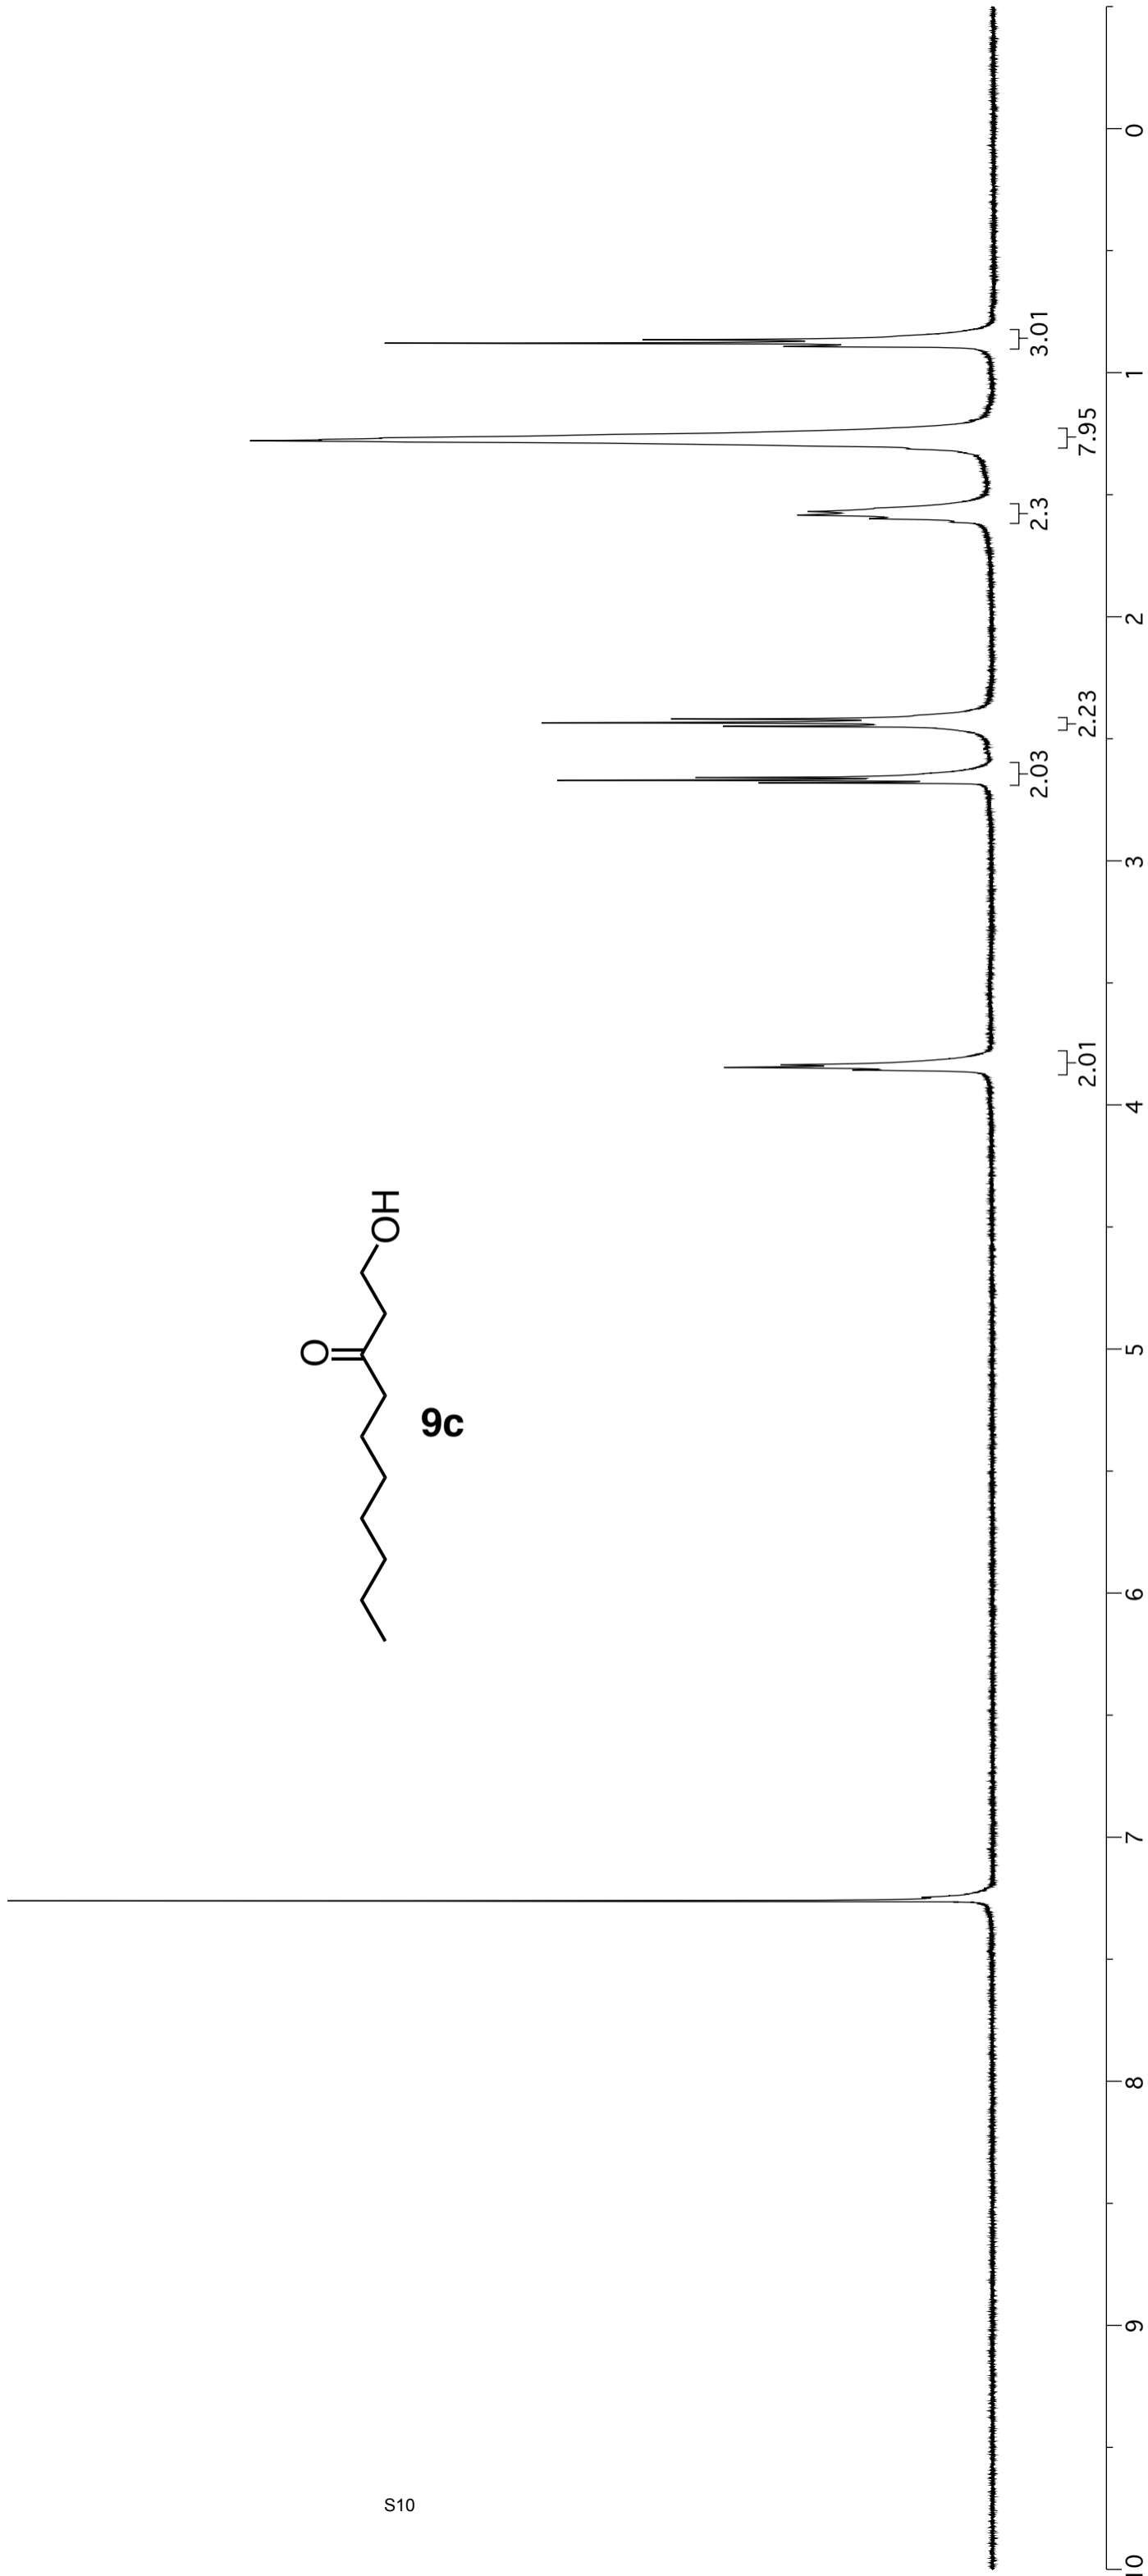

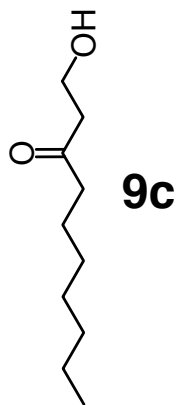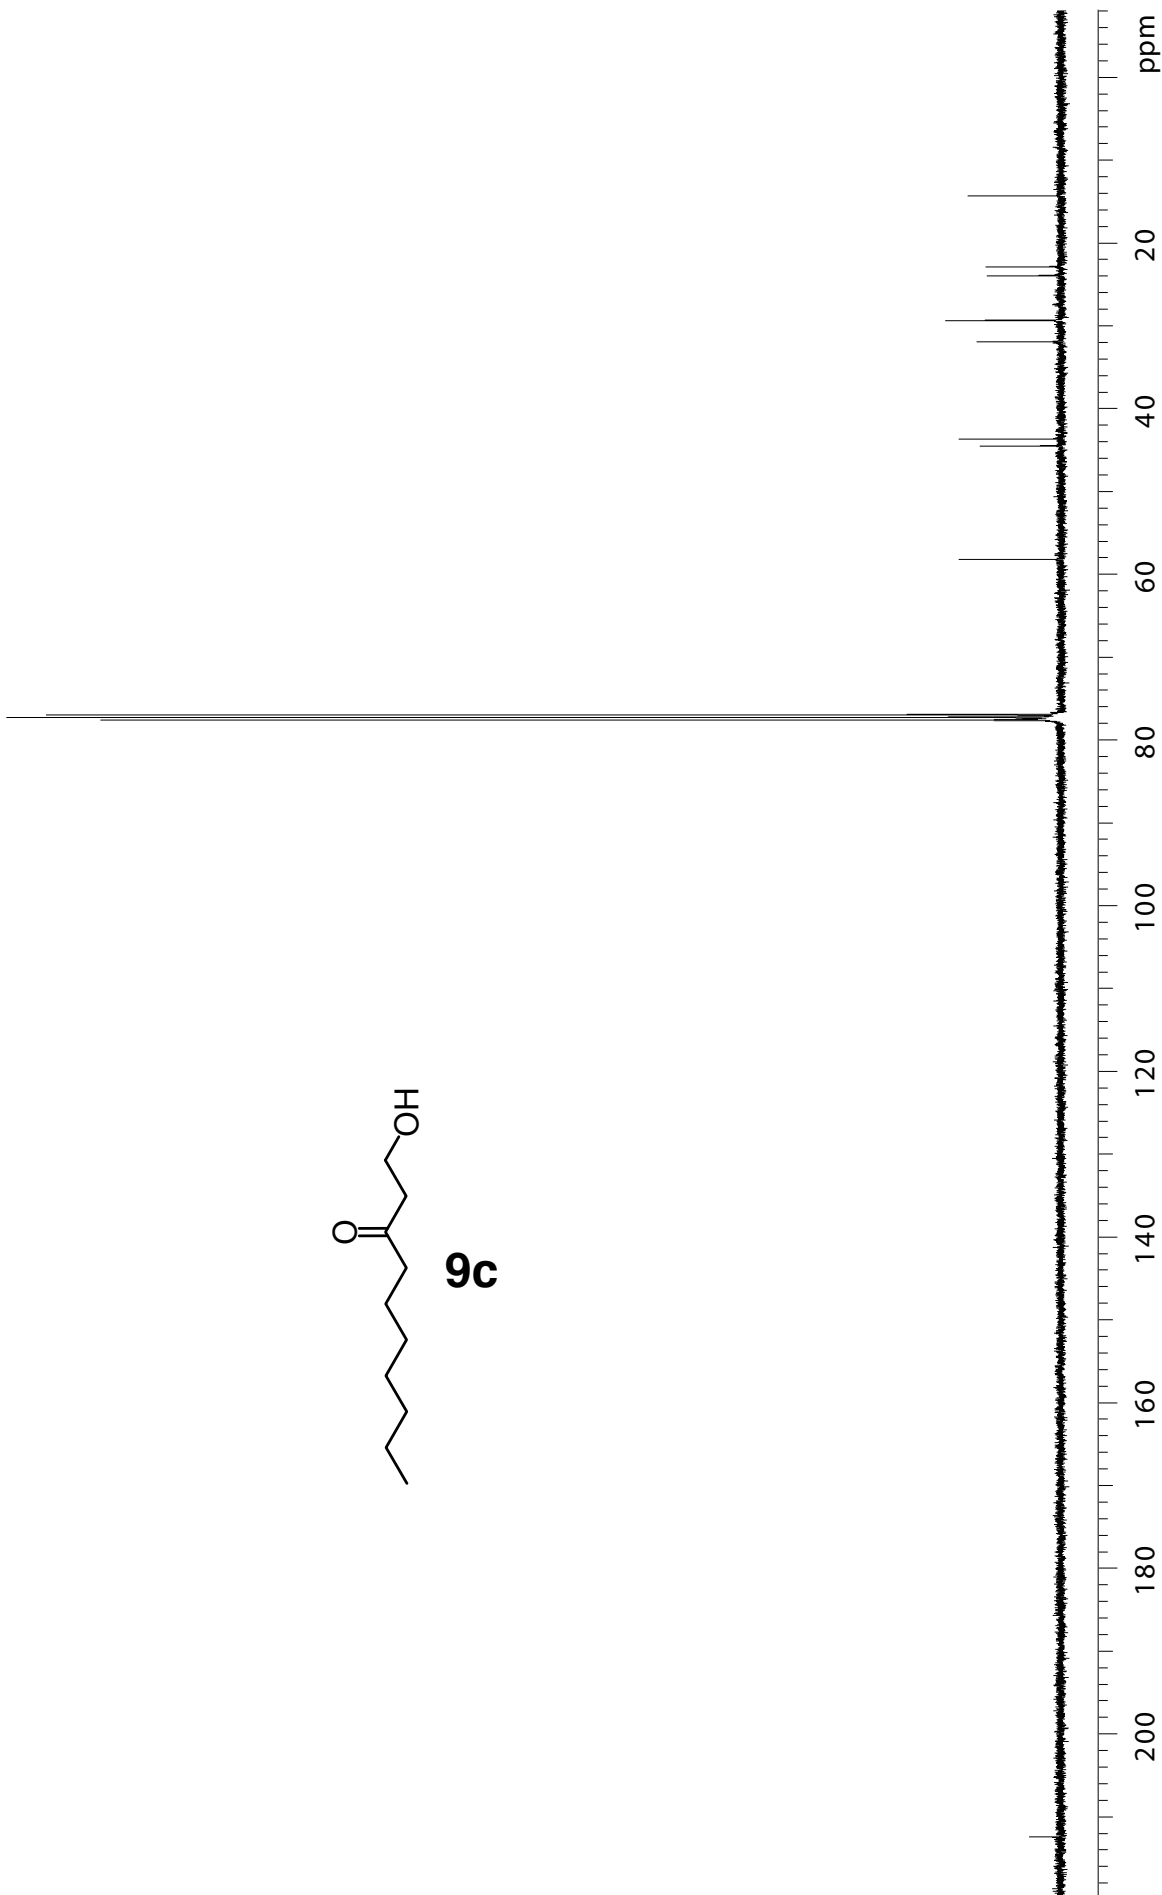

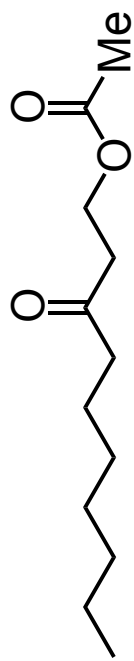

**9d**

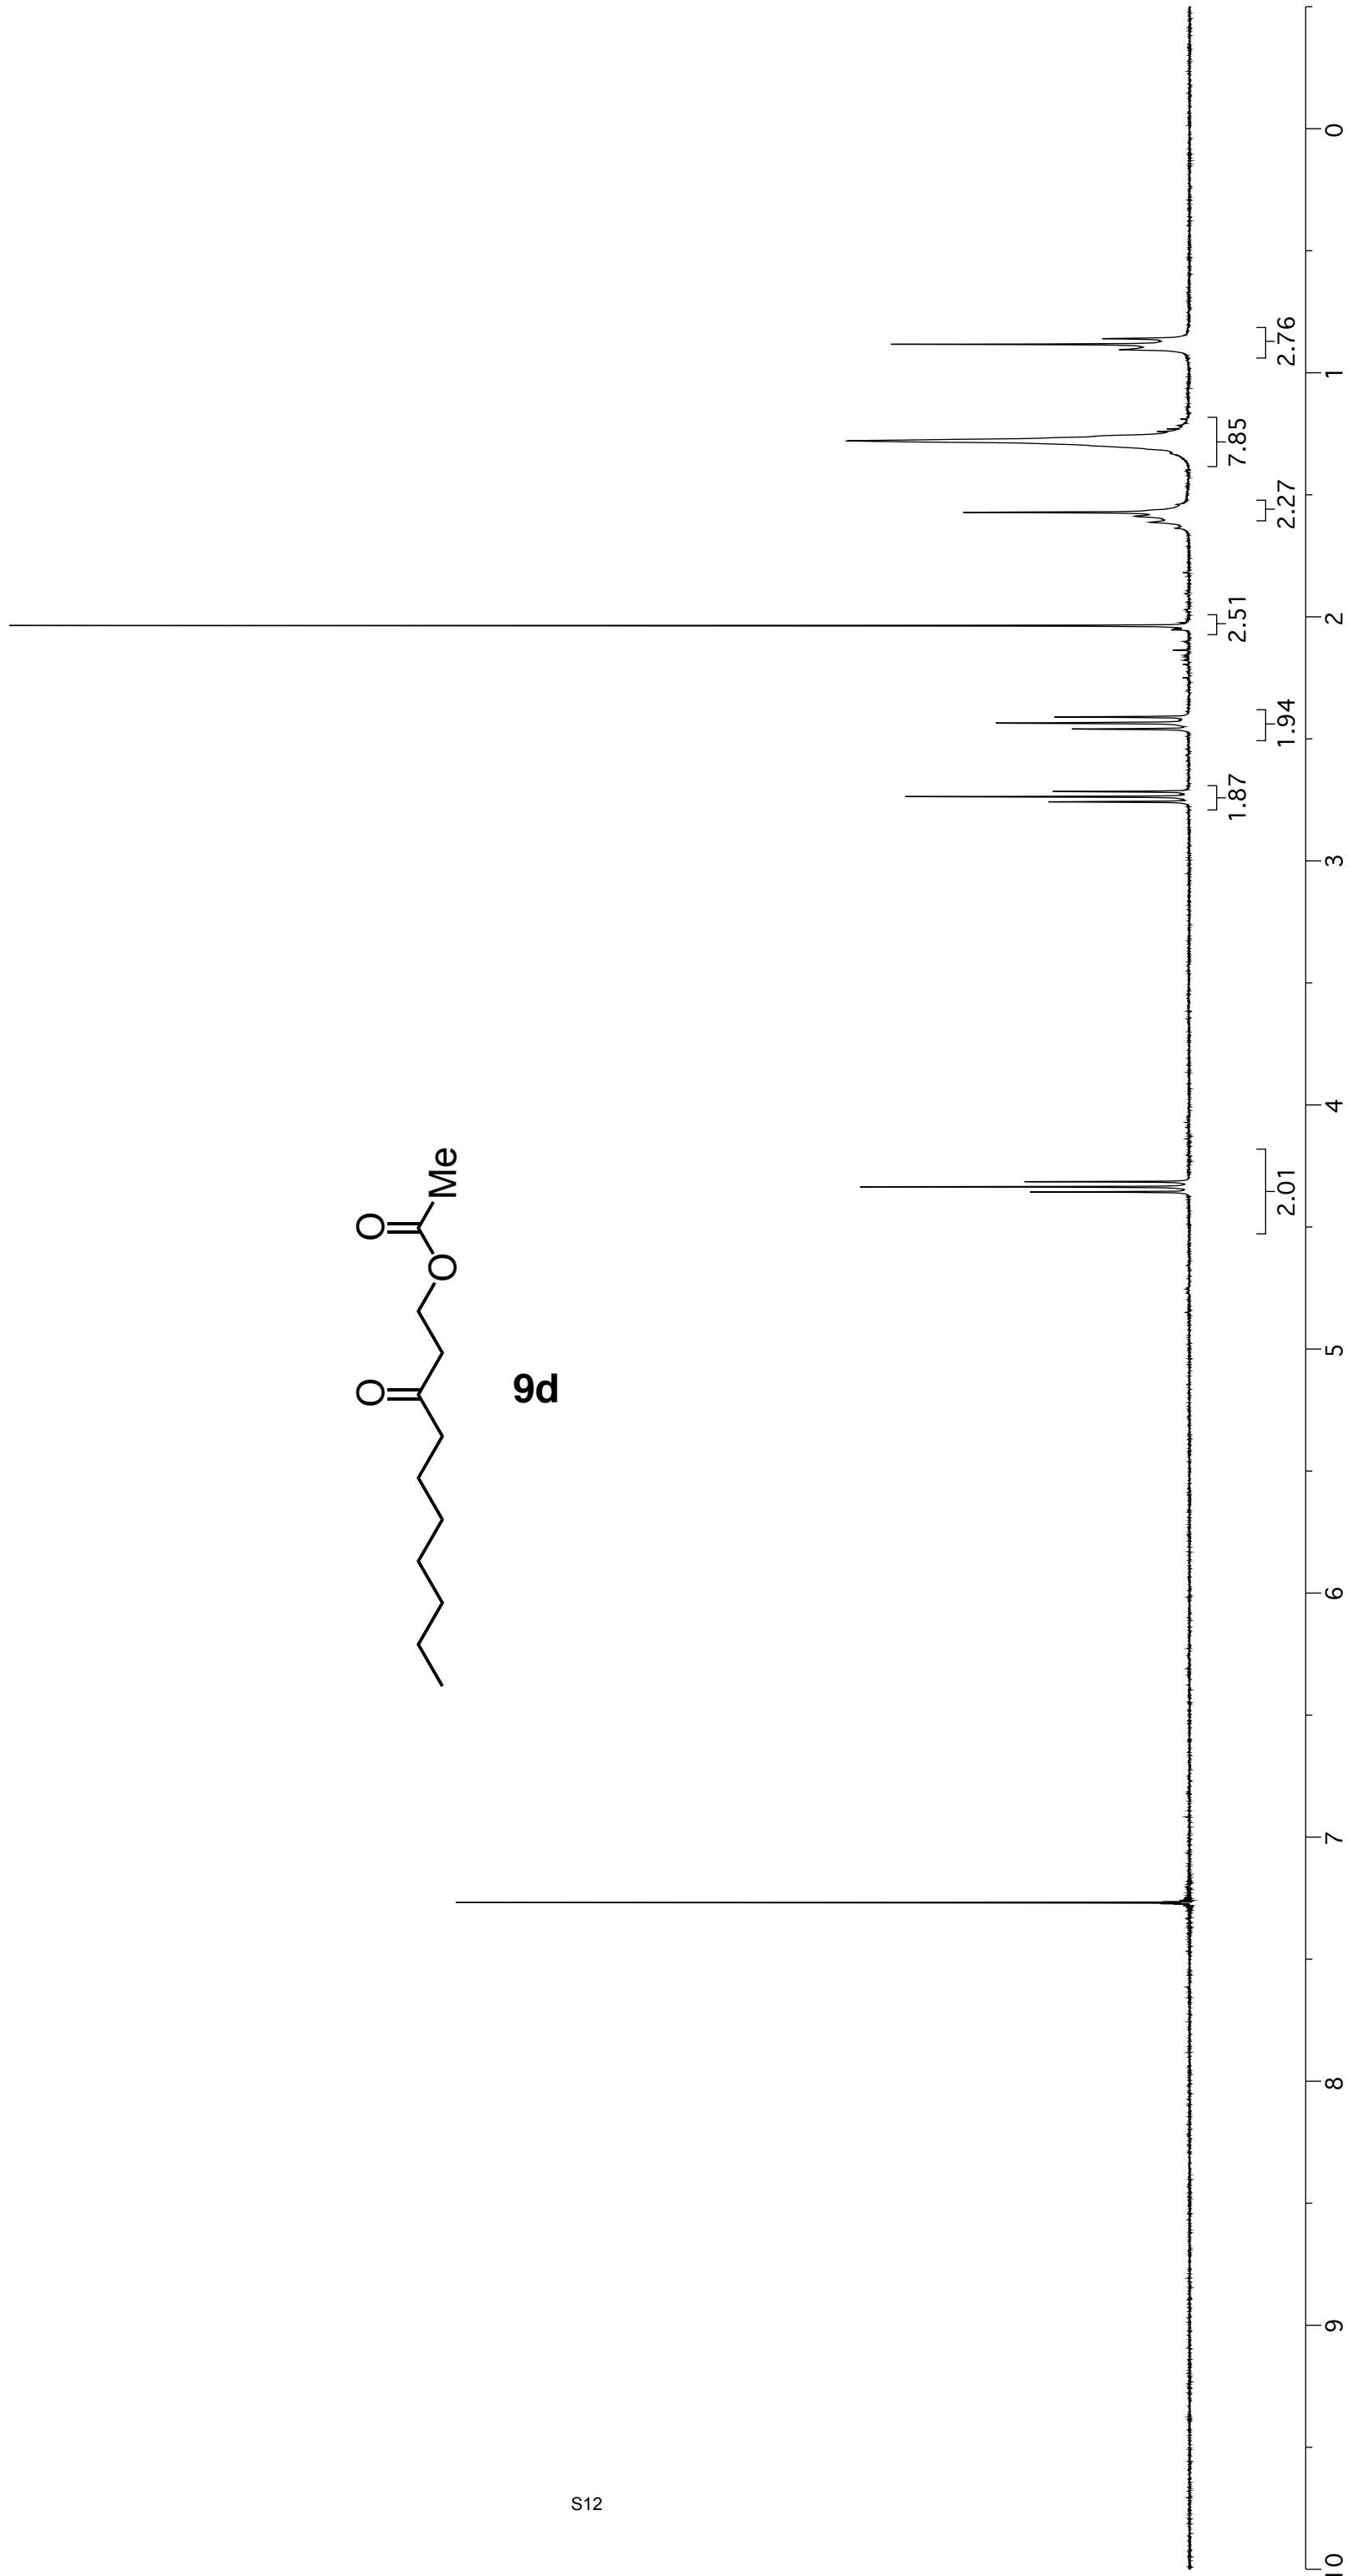

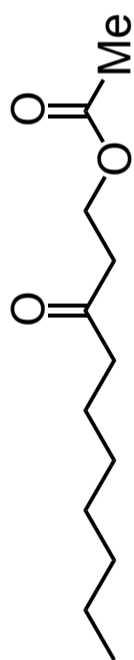

9d

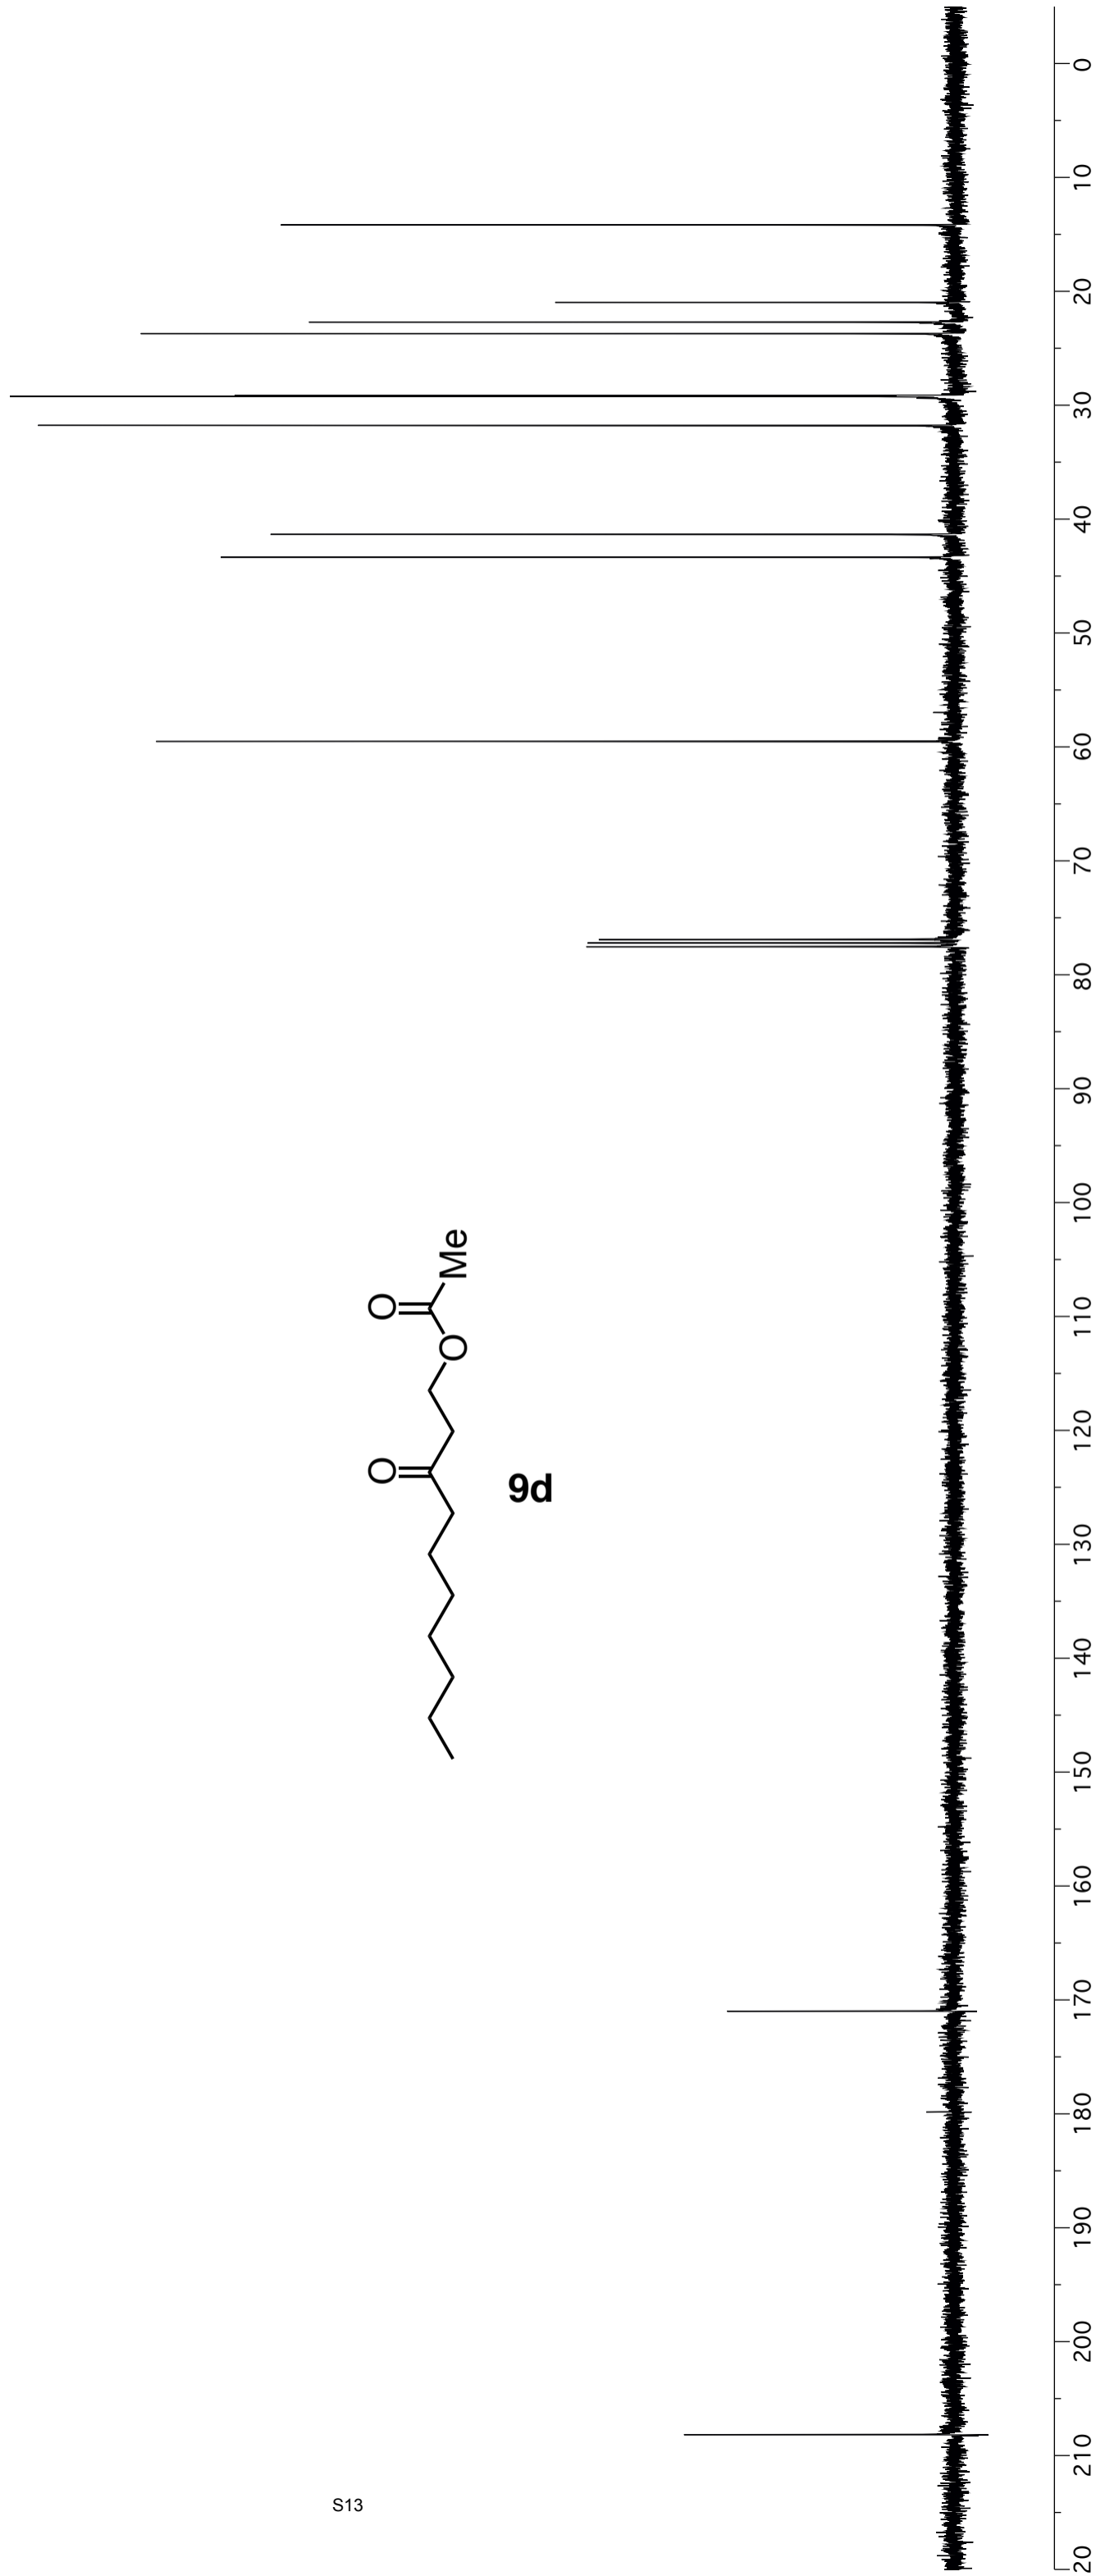

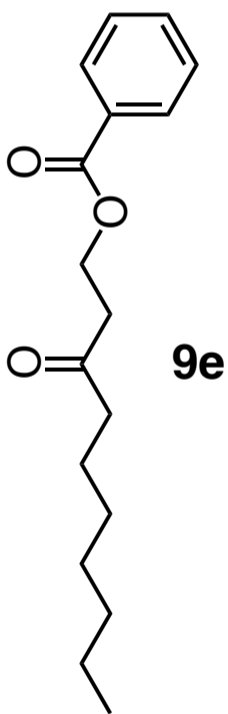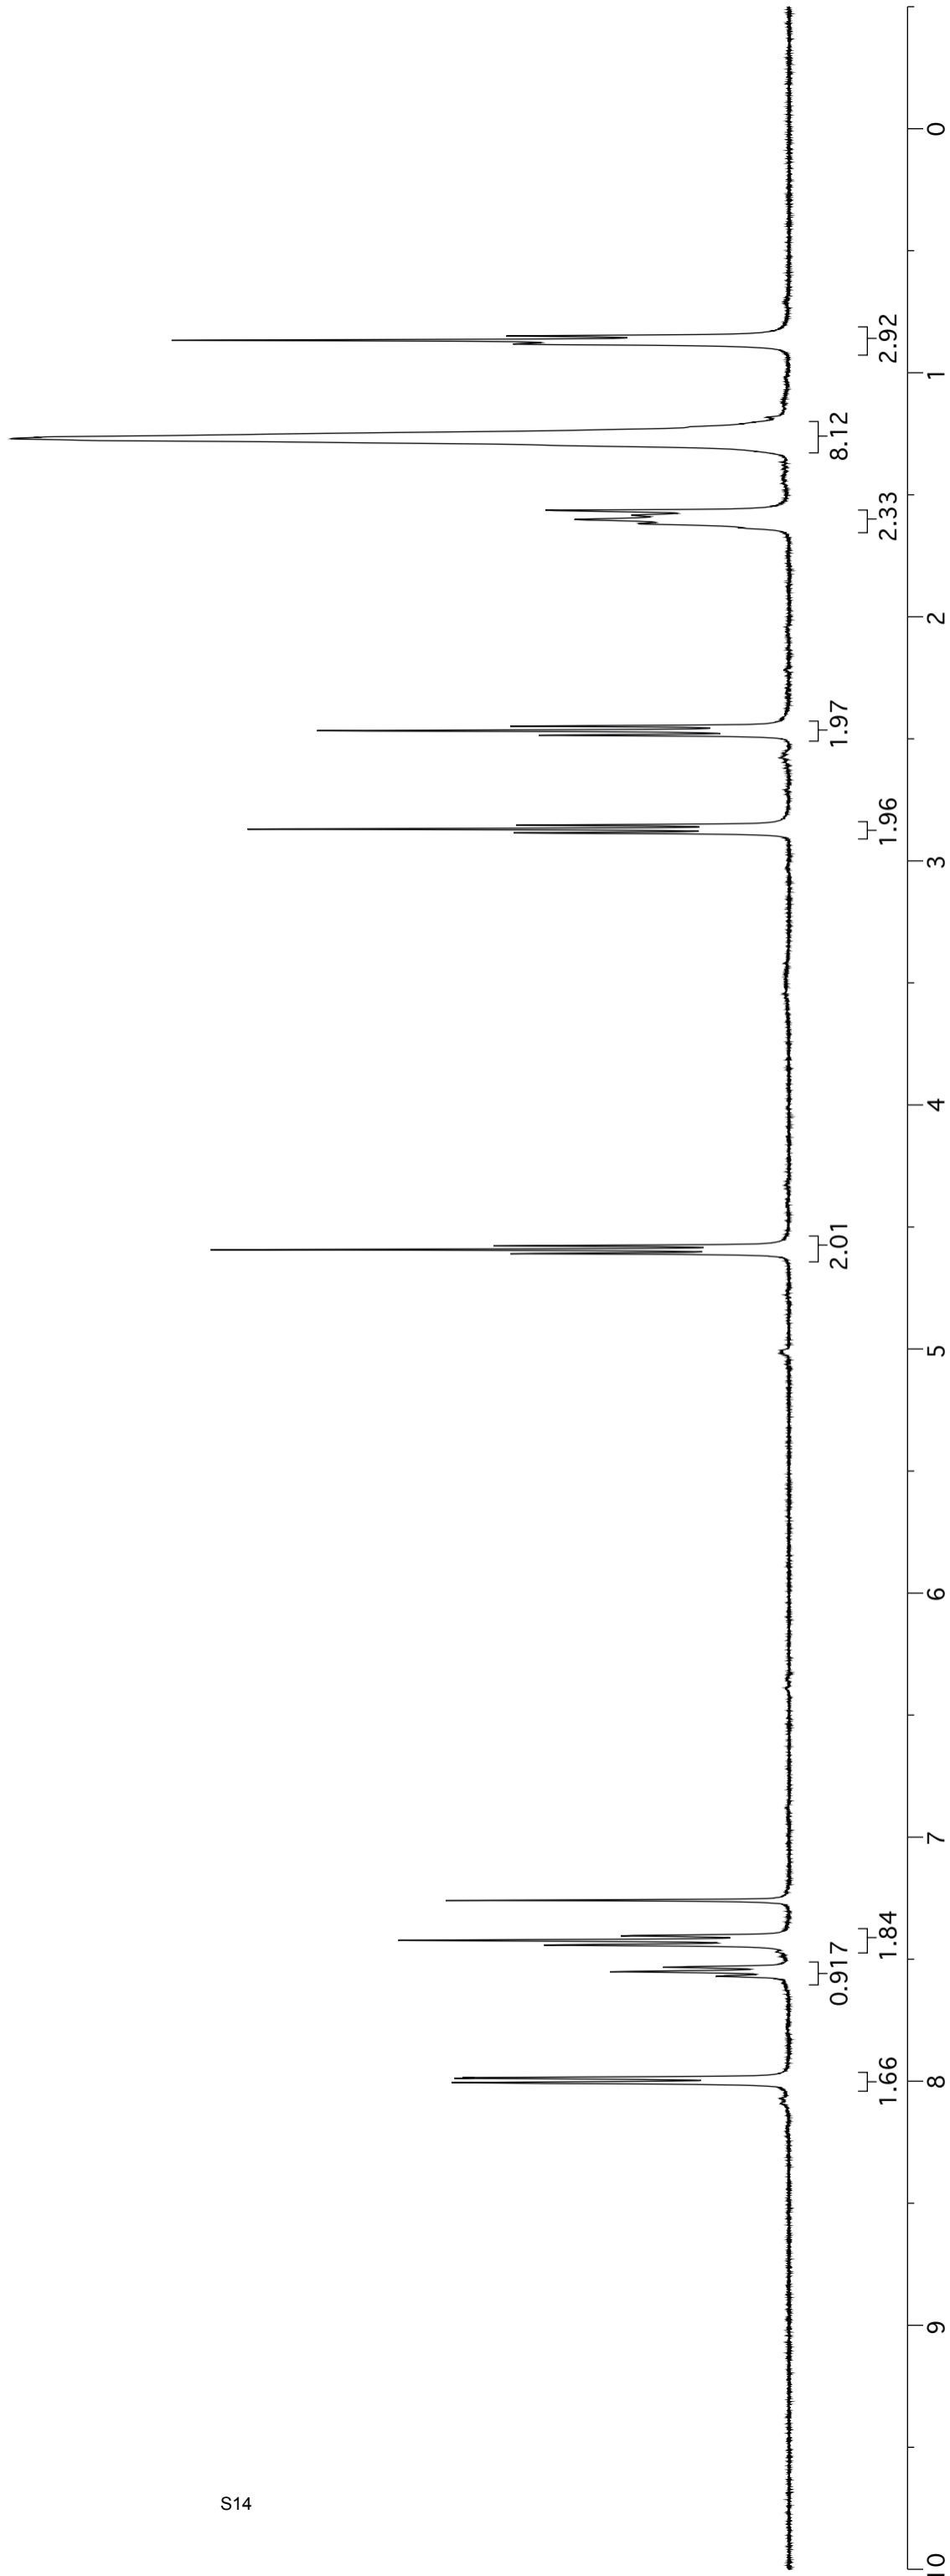

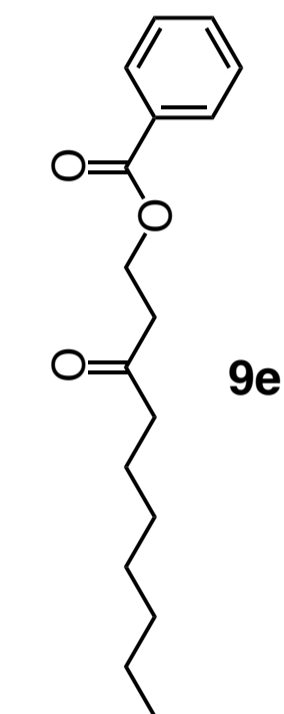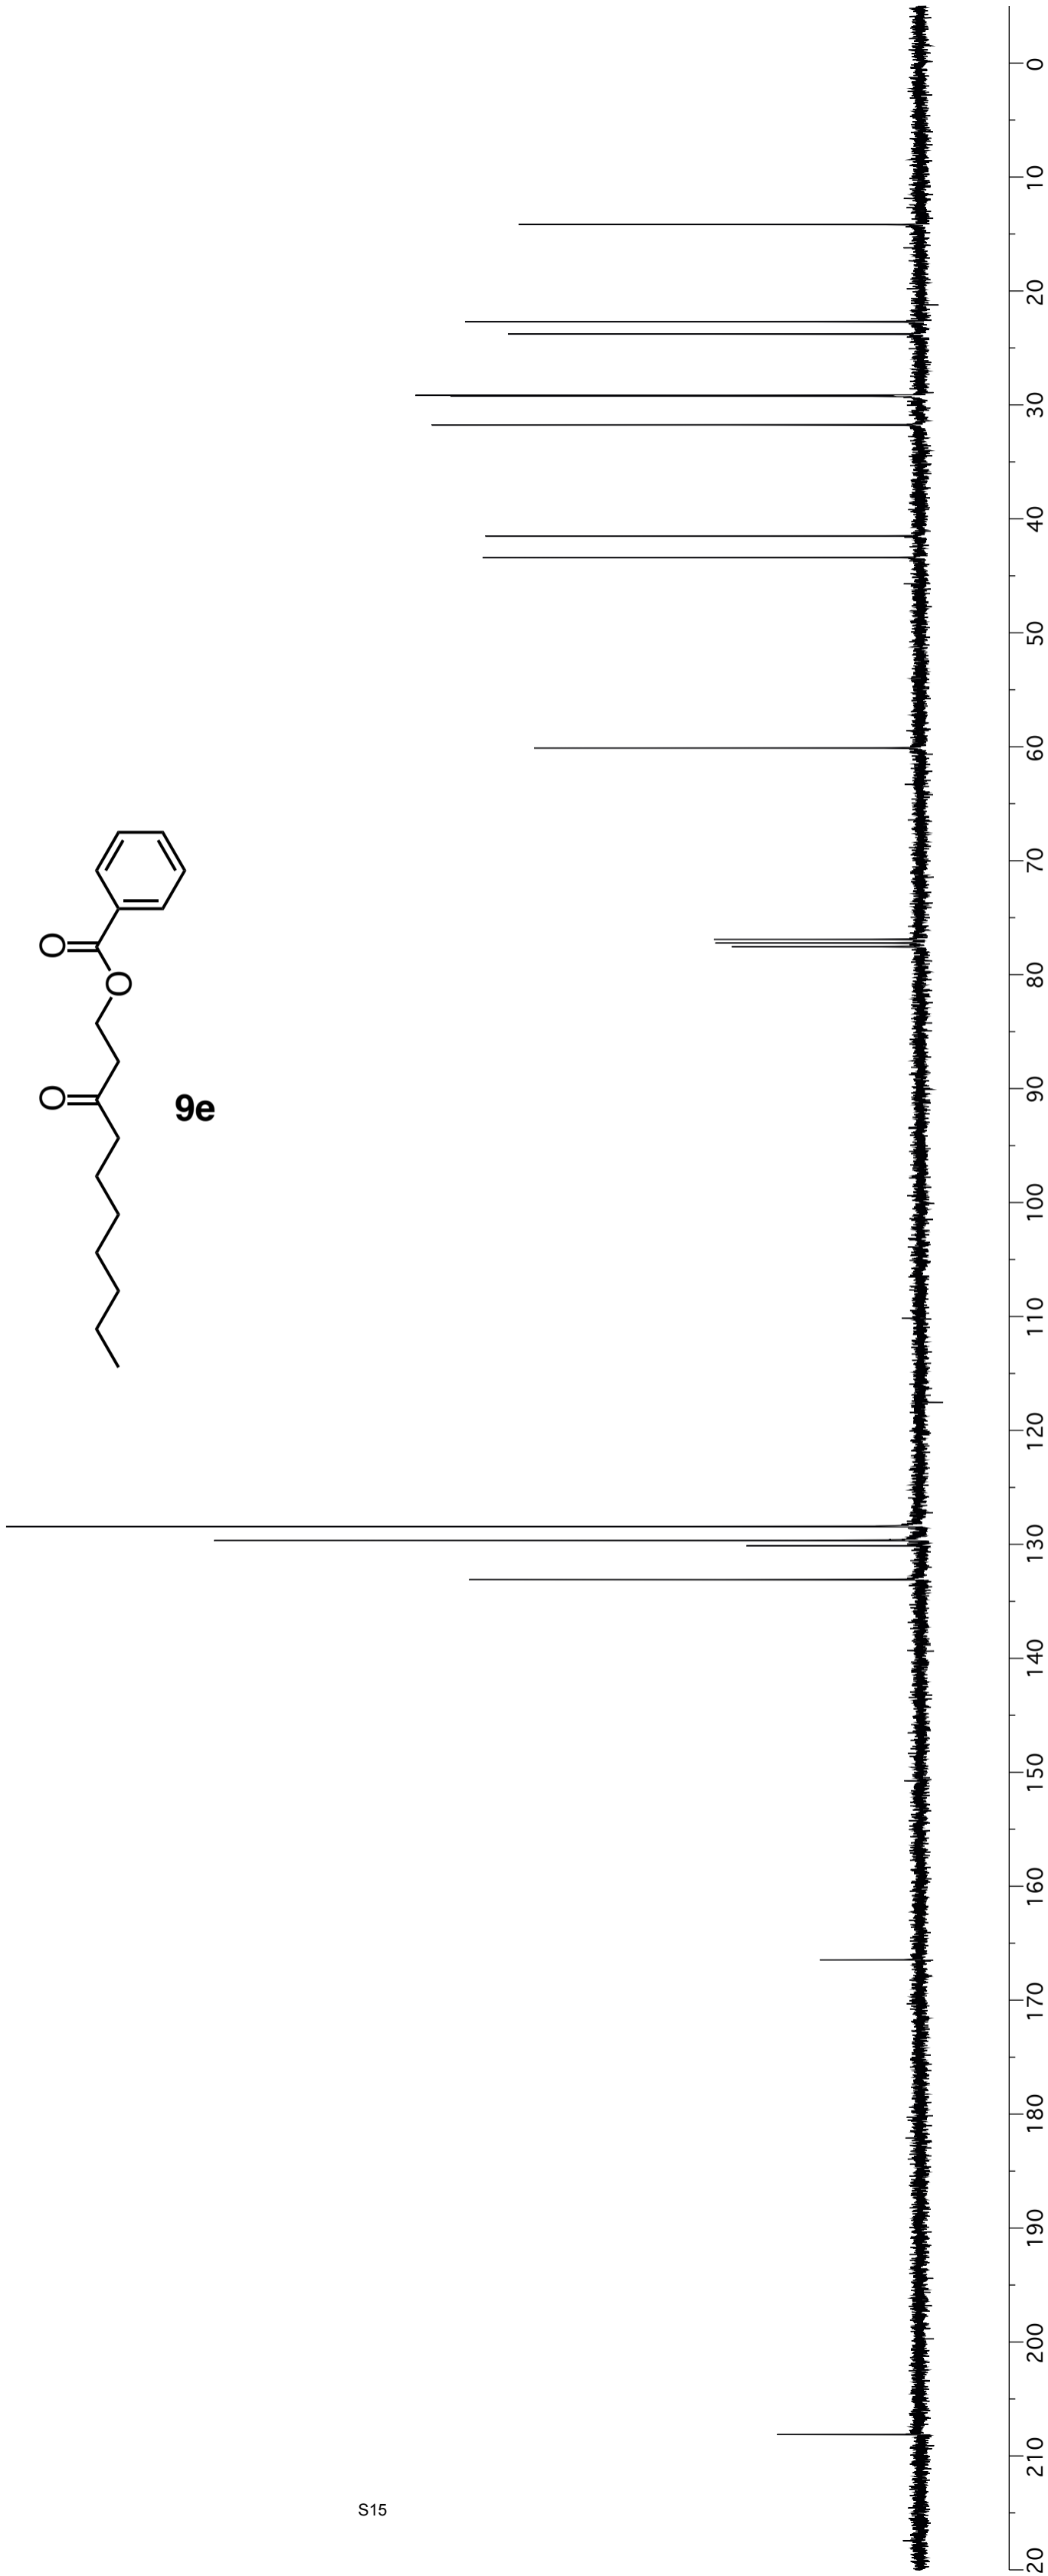

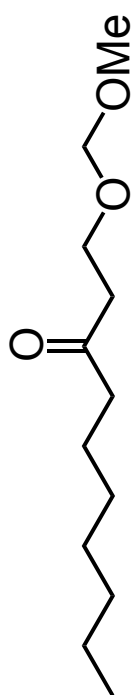

**9f**

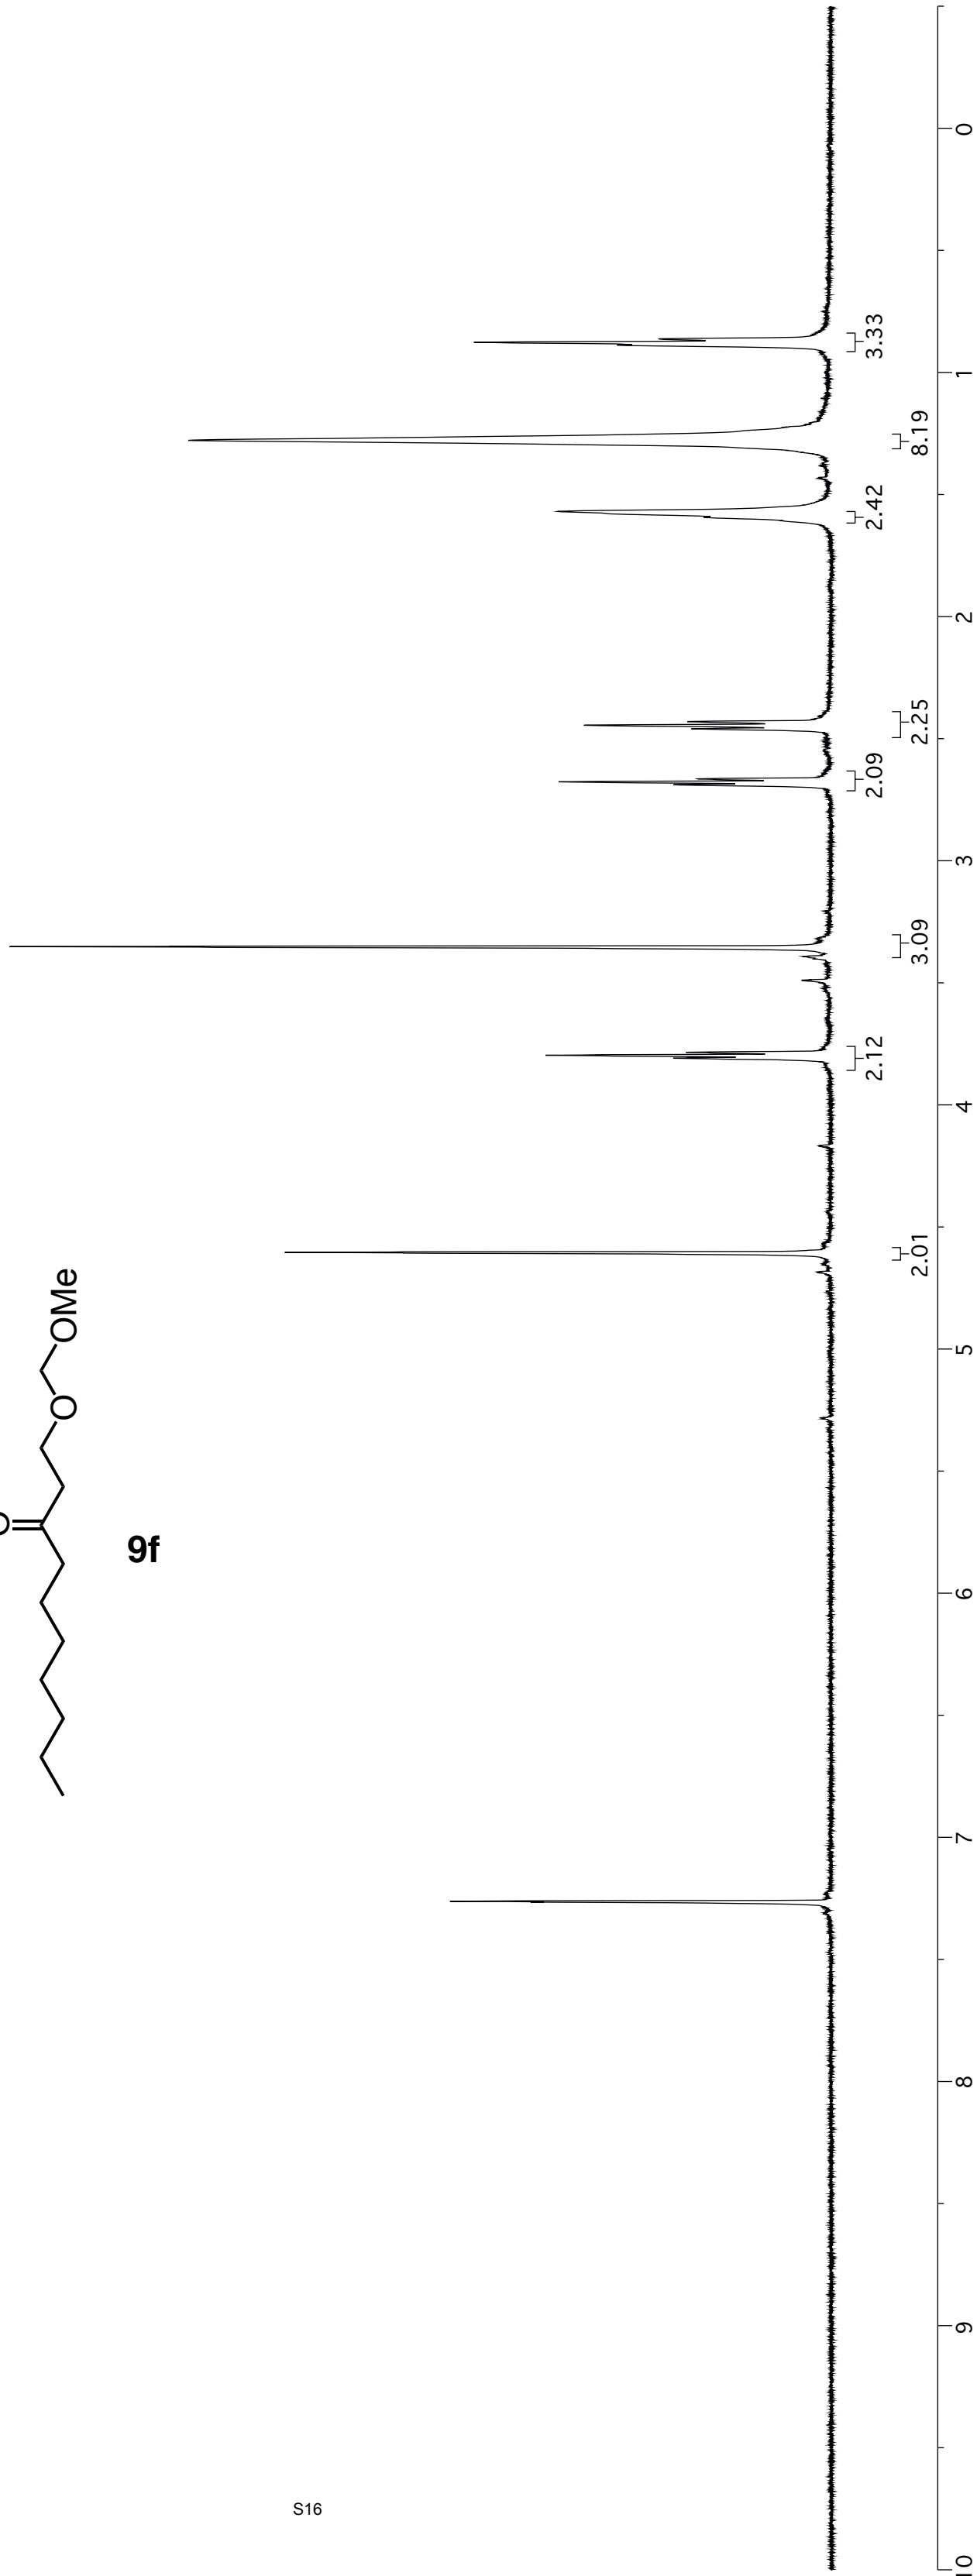



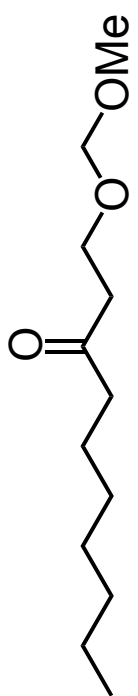

**9f**

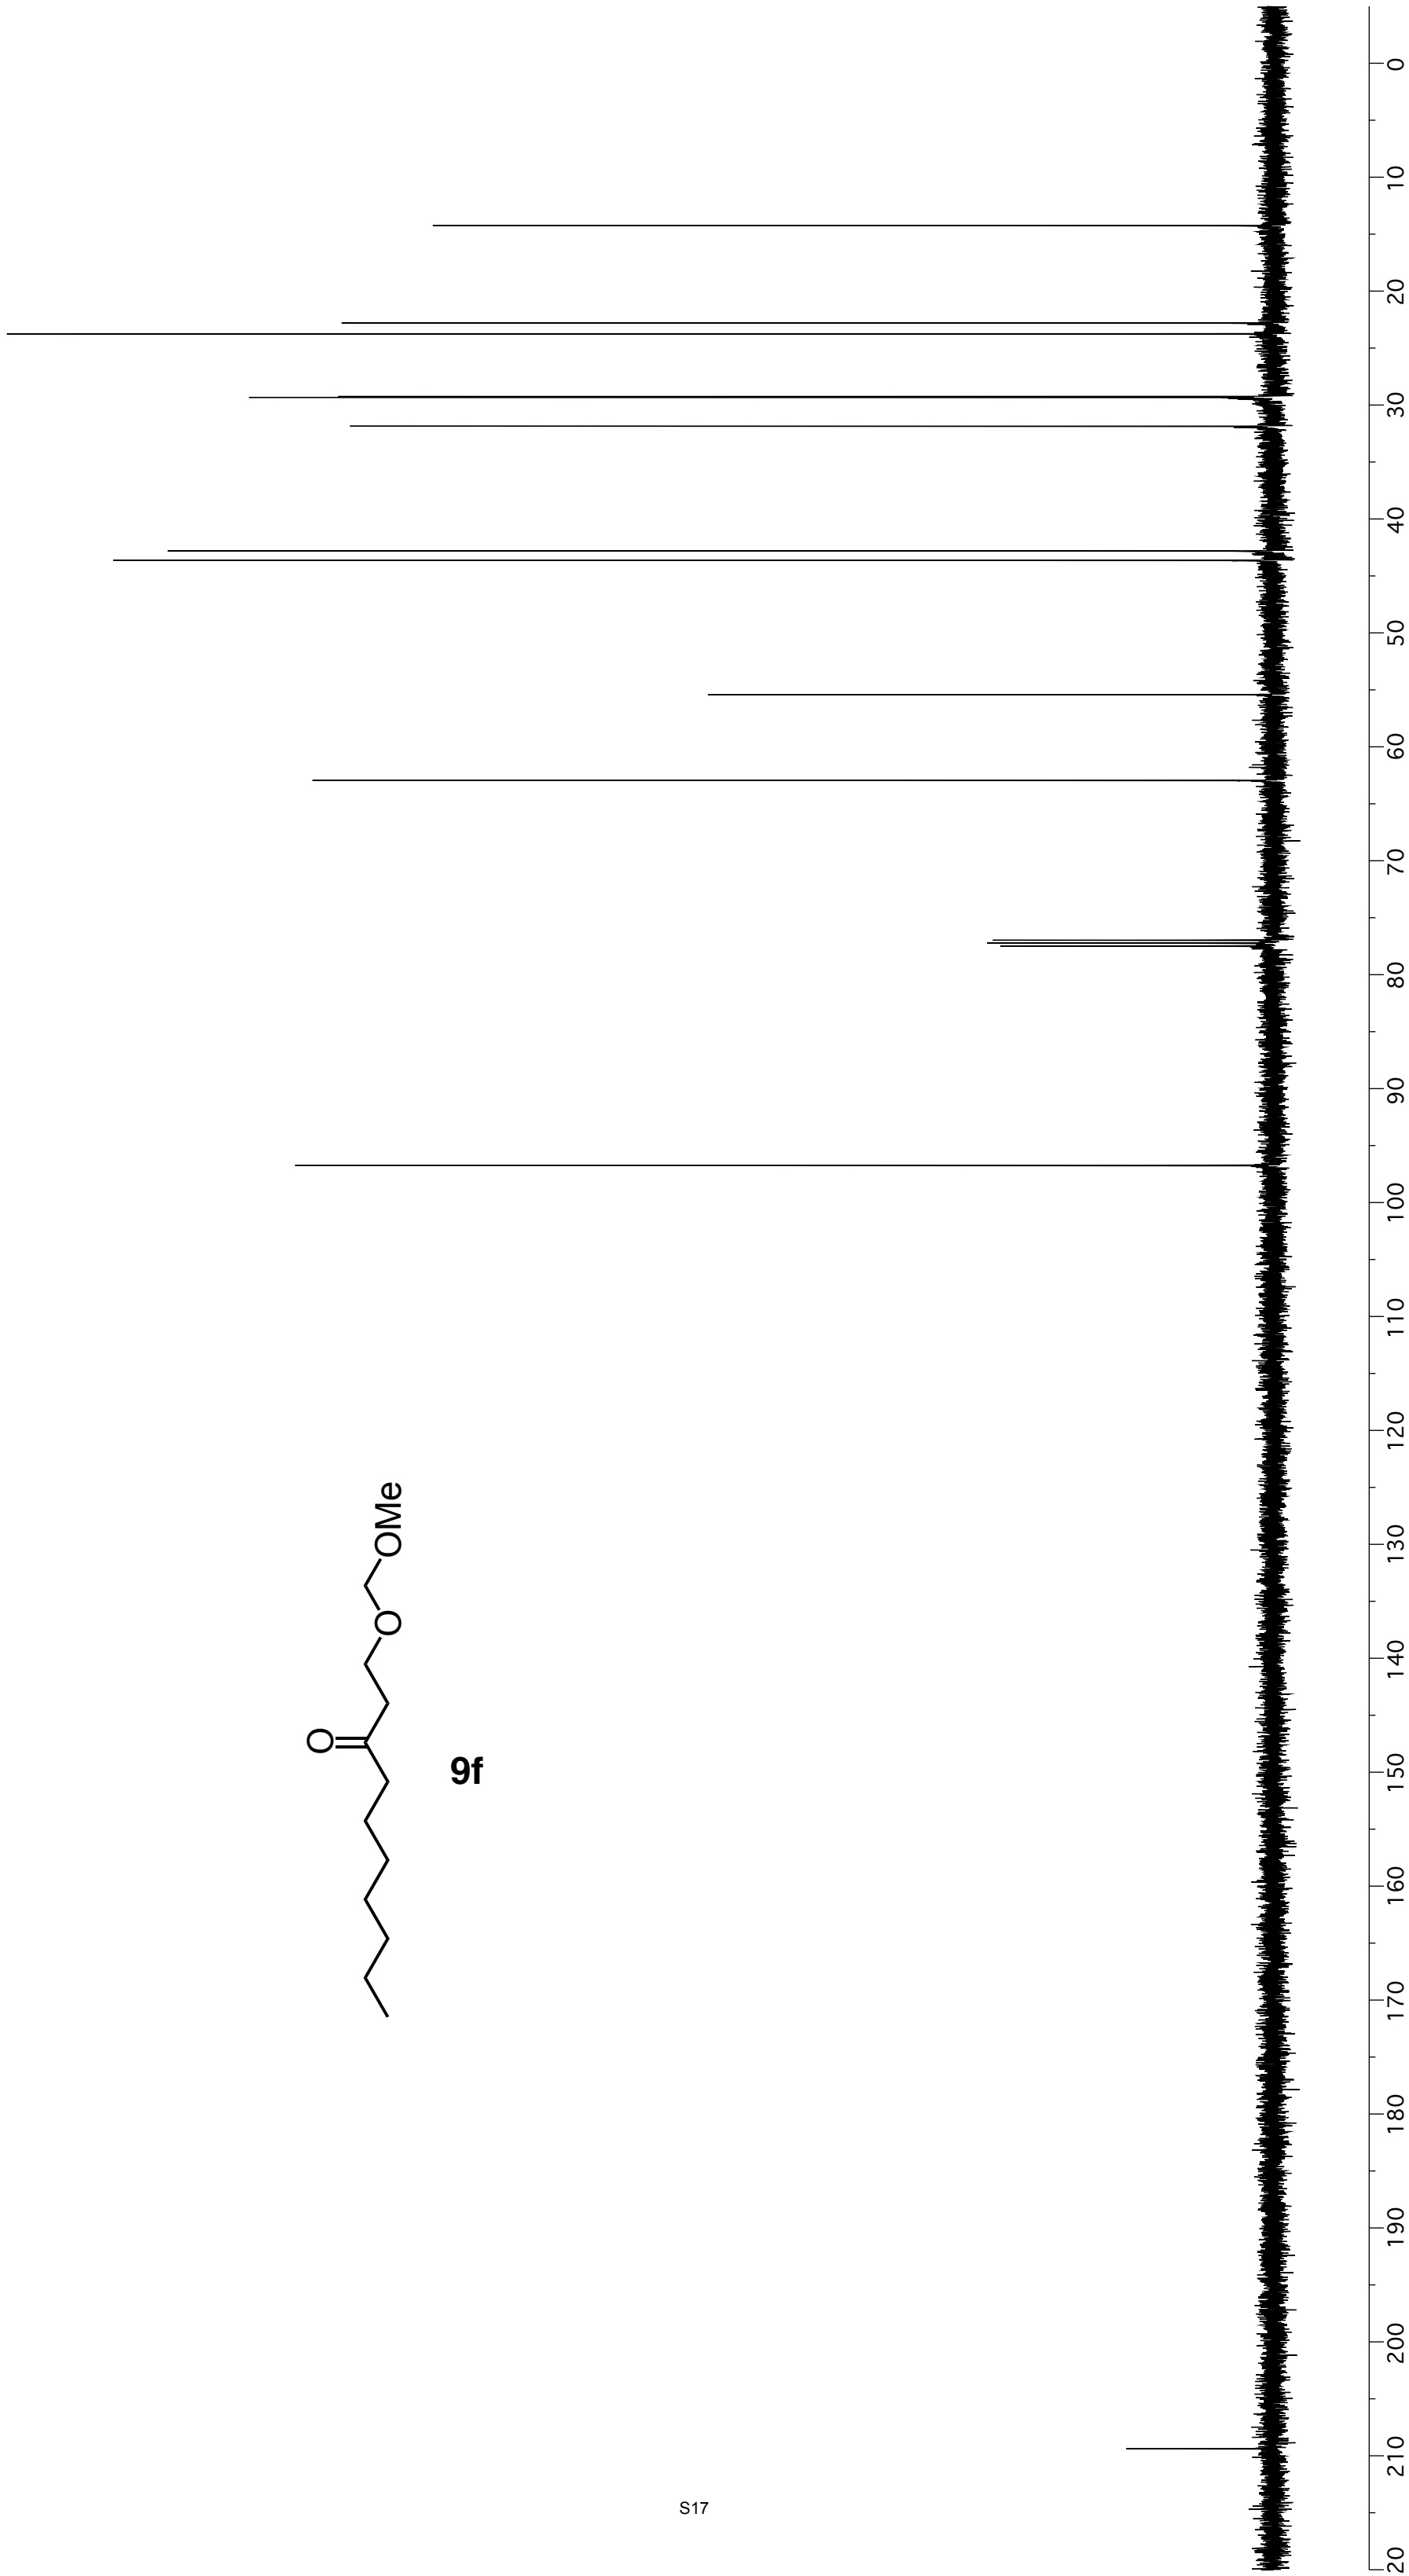

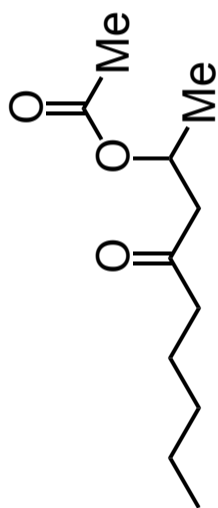

9g

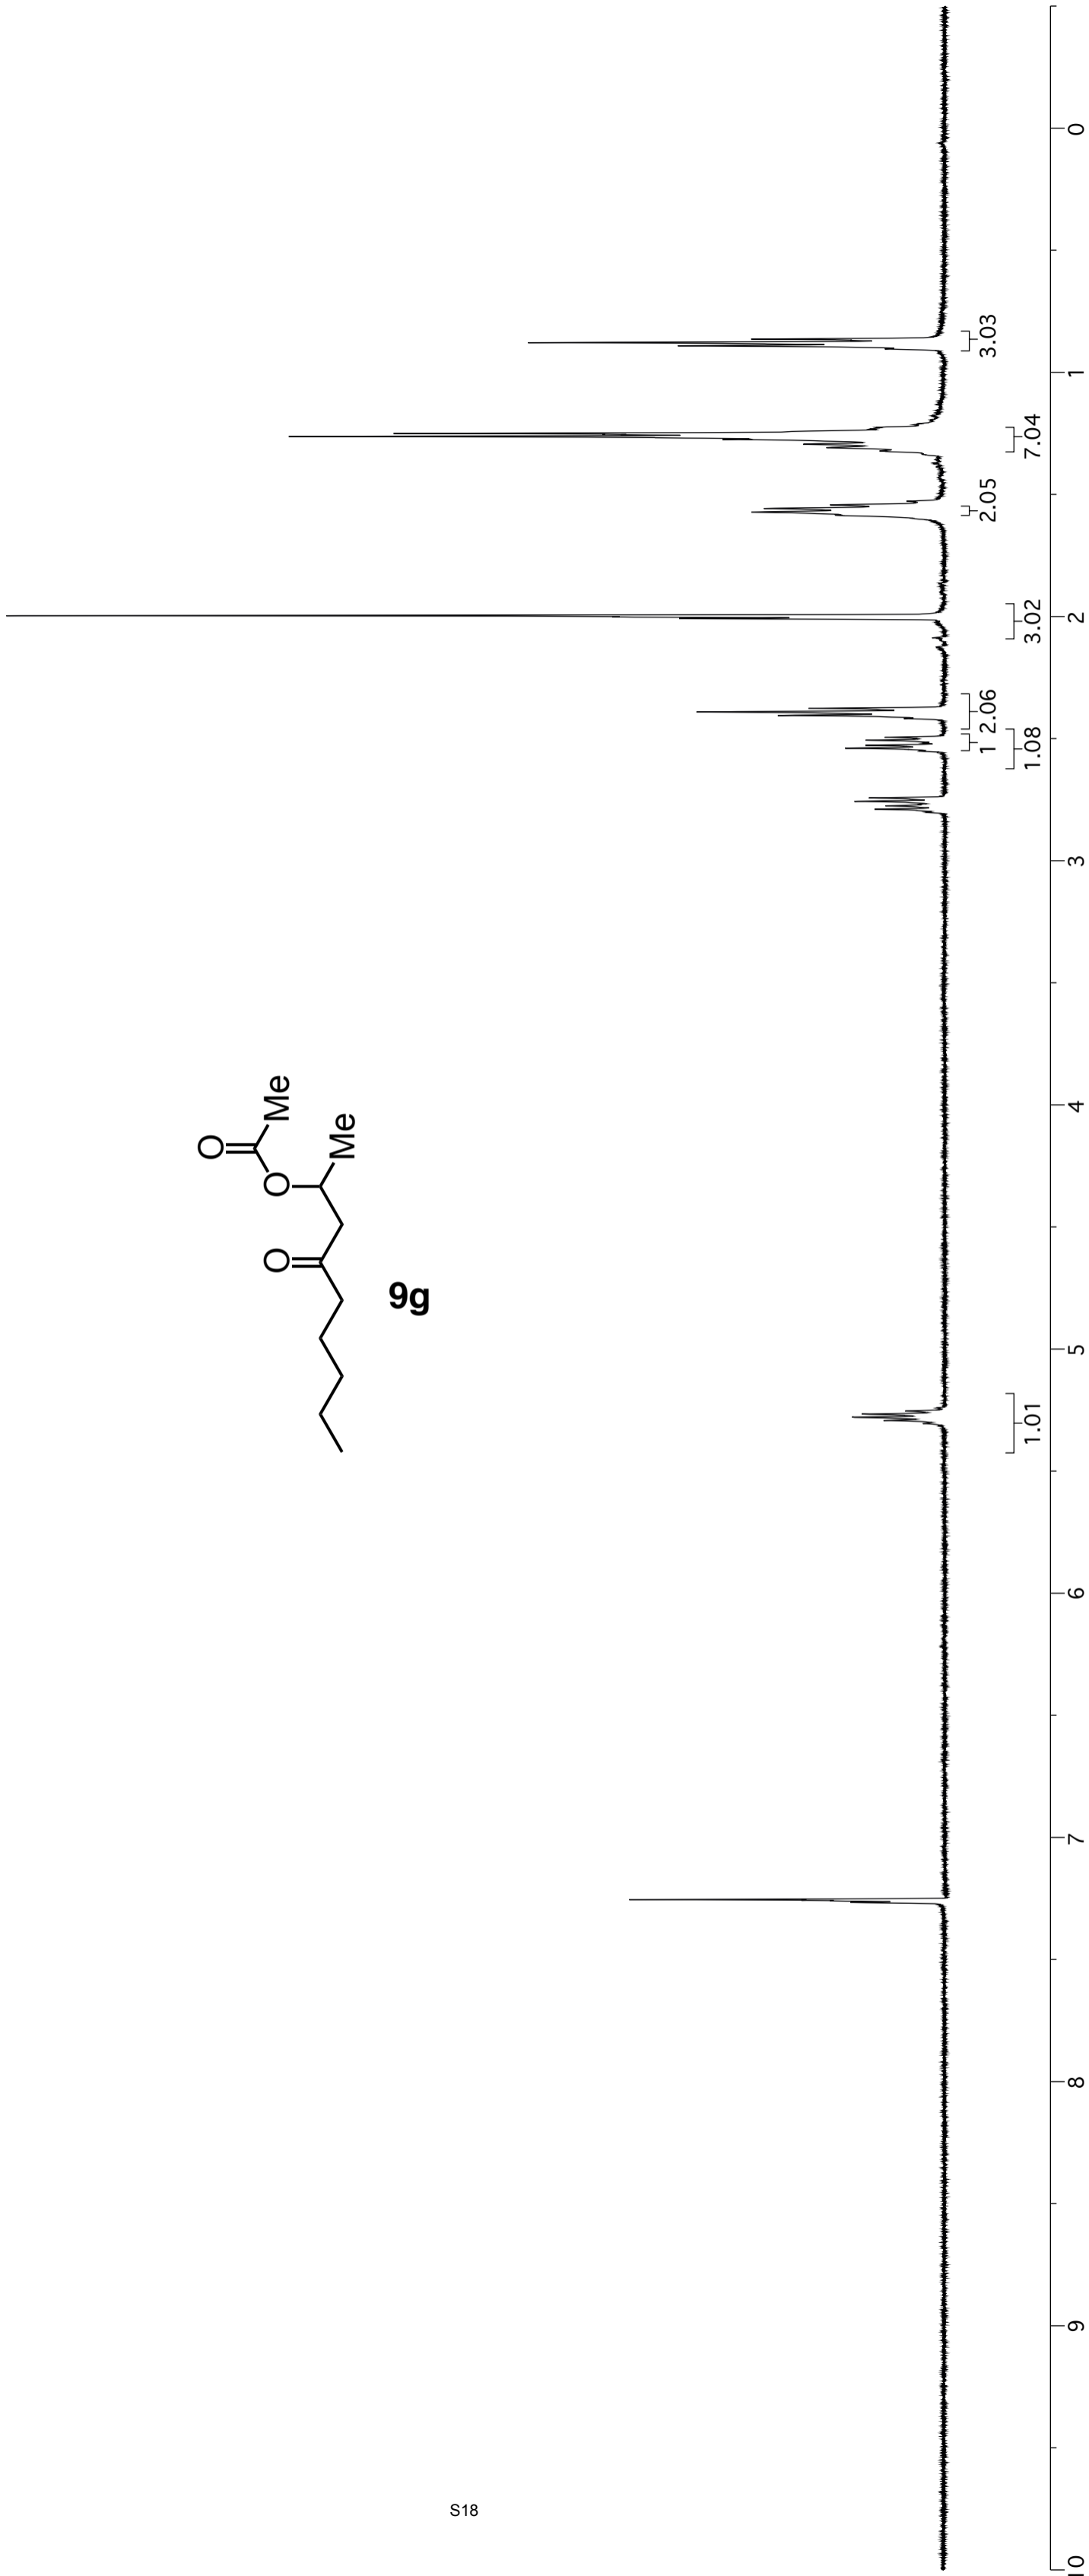

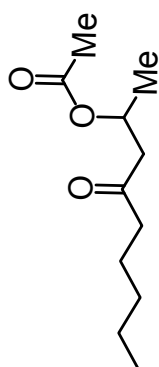

**9g**

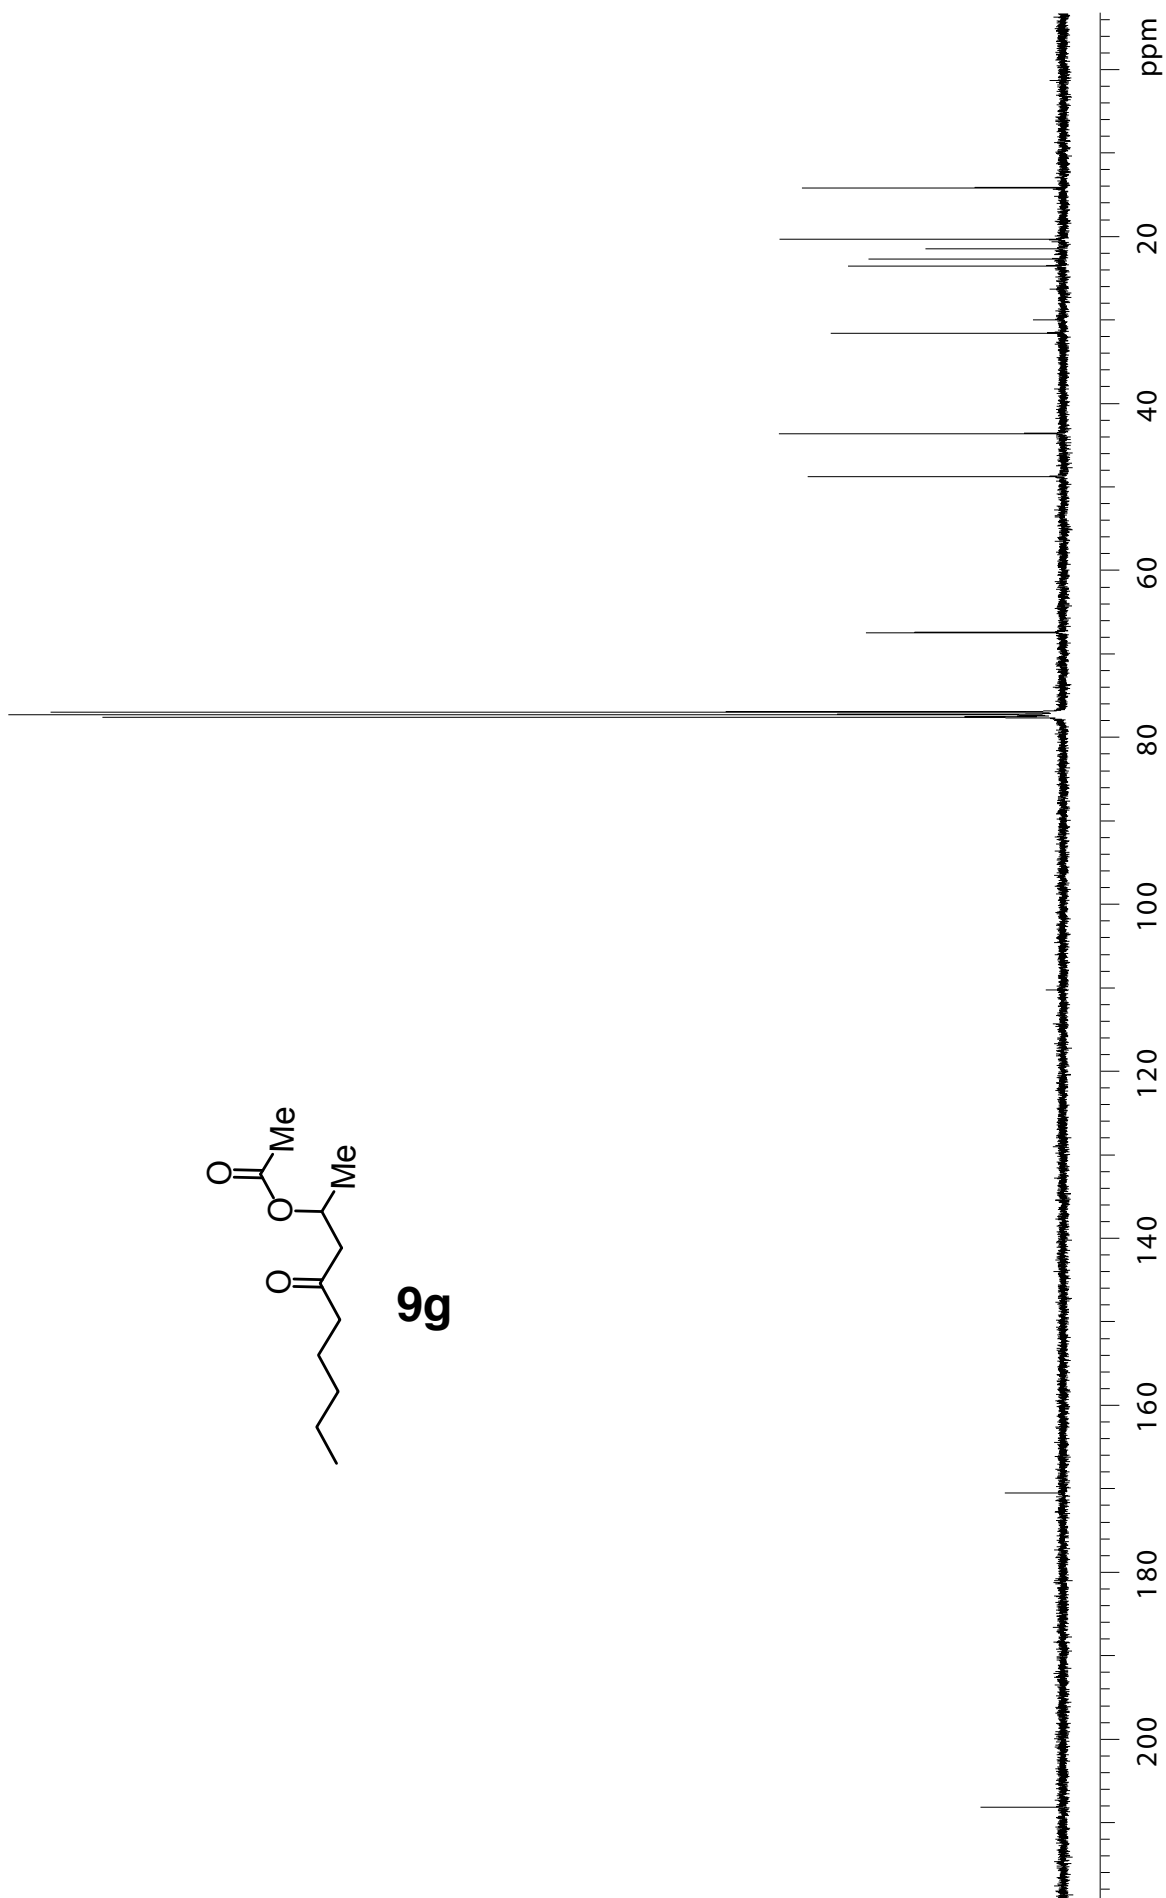

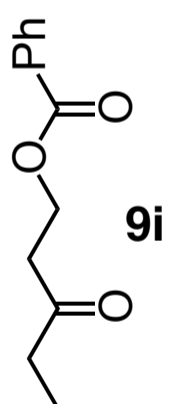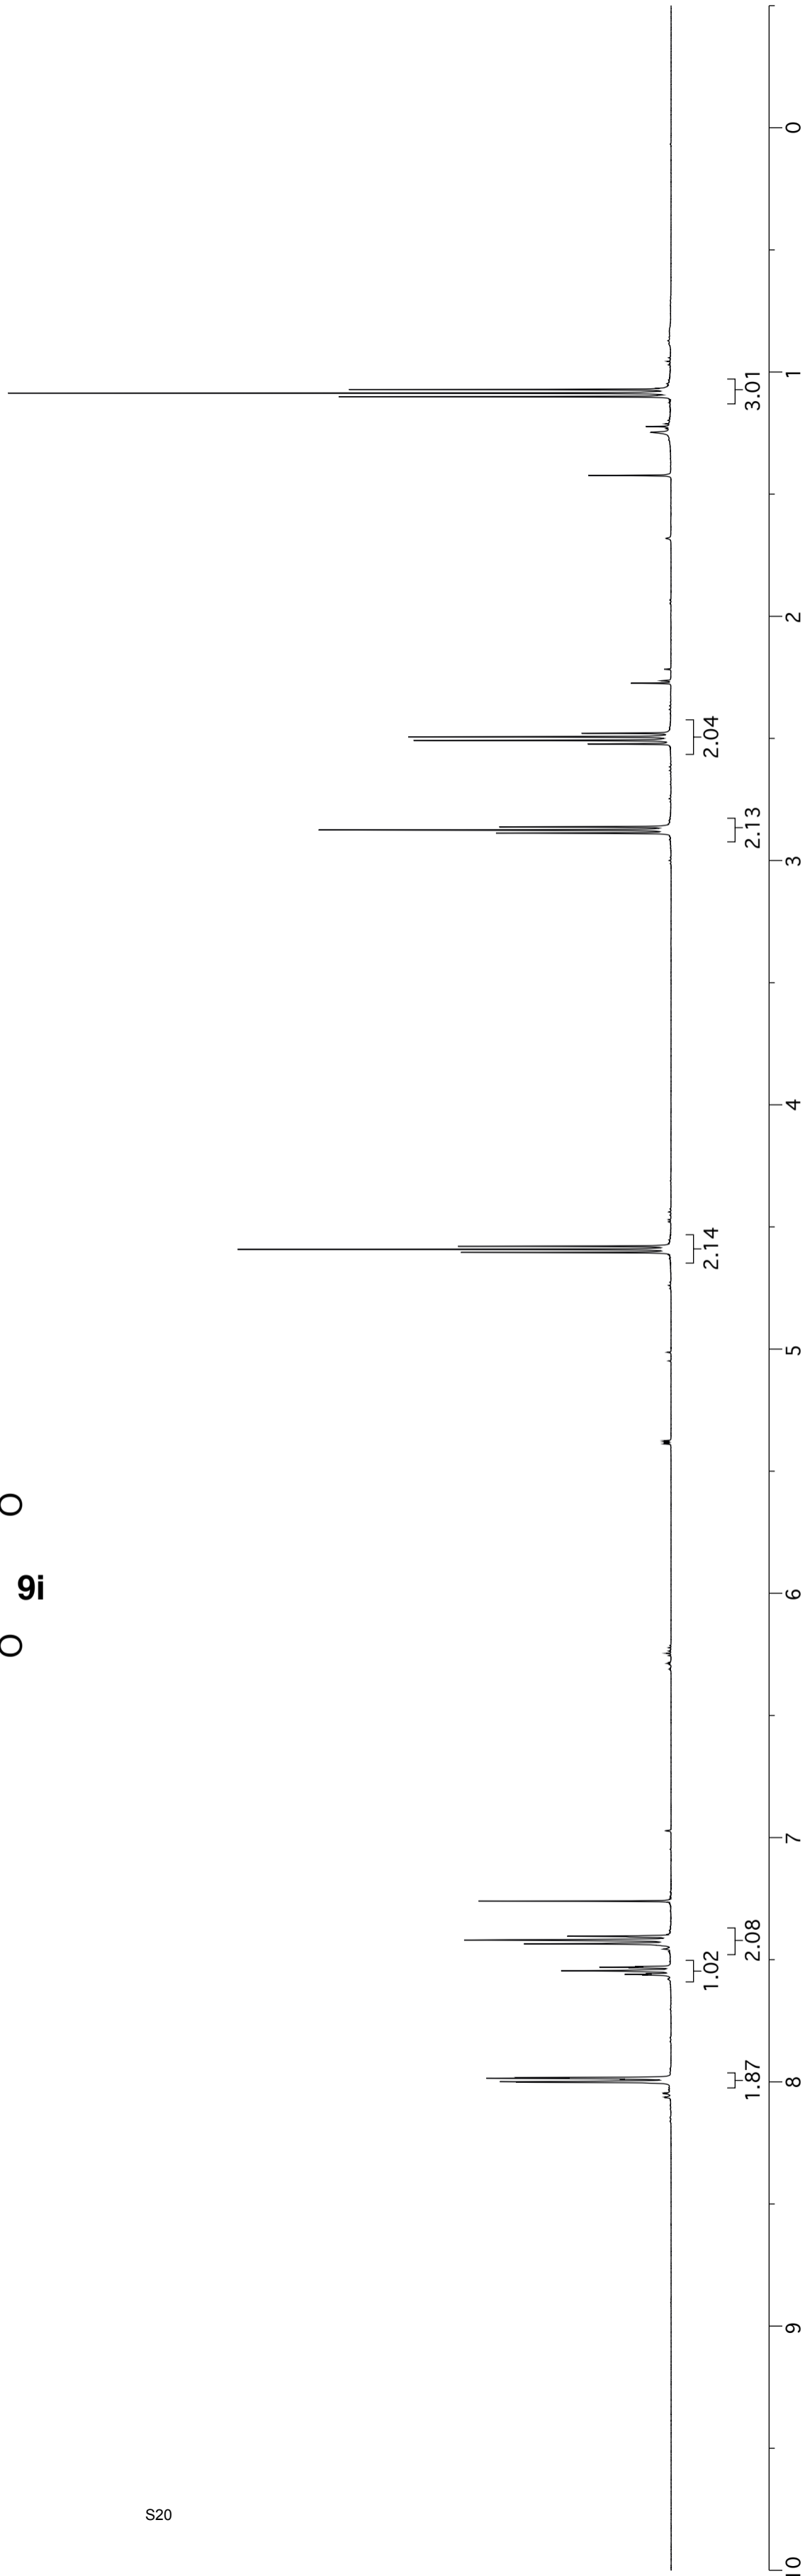

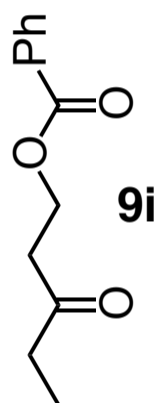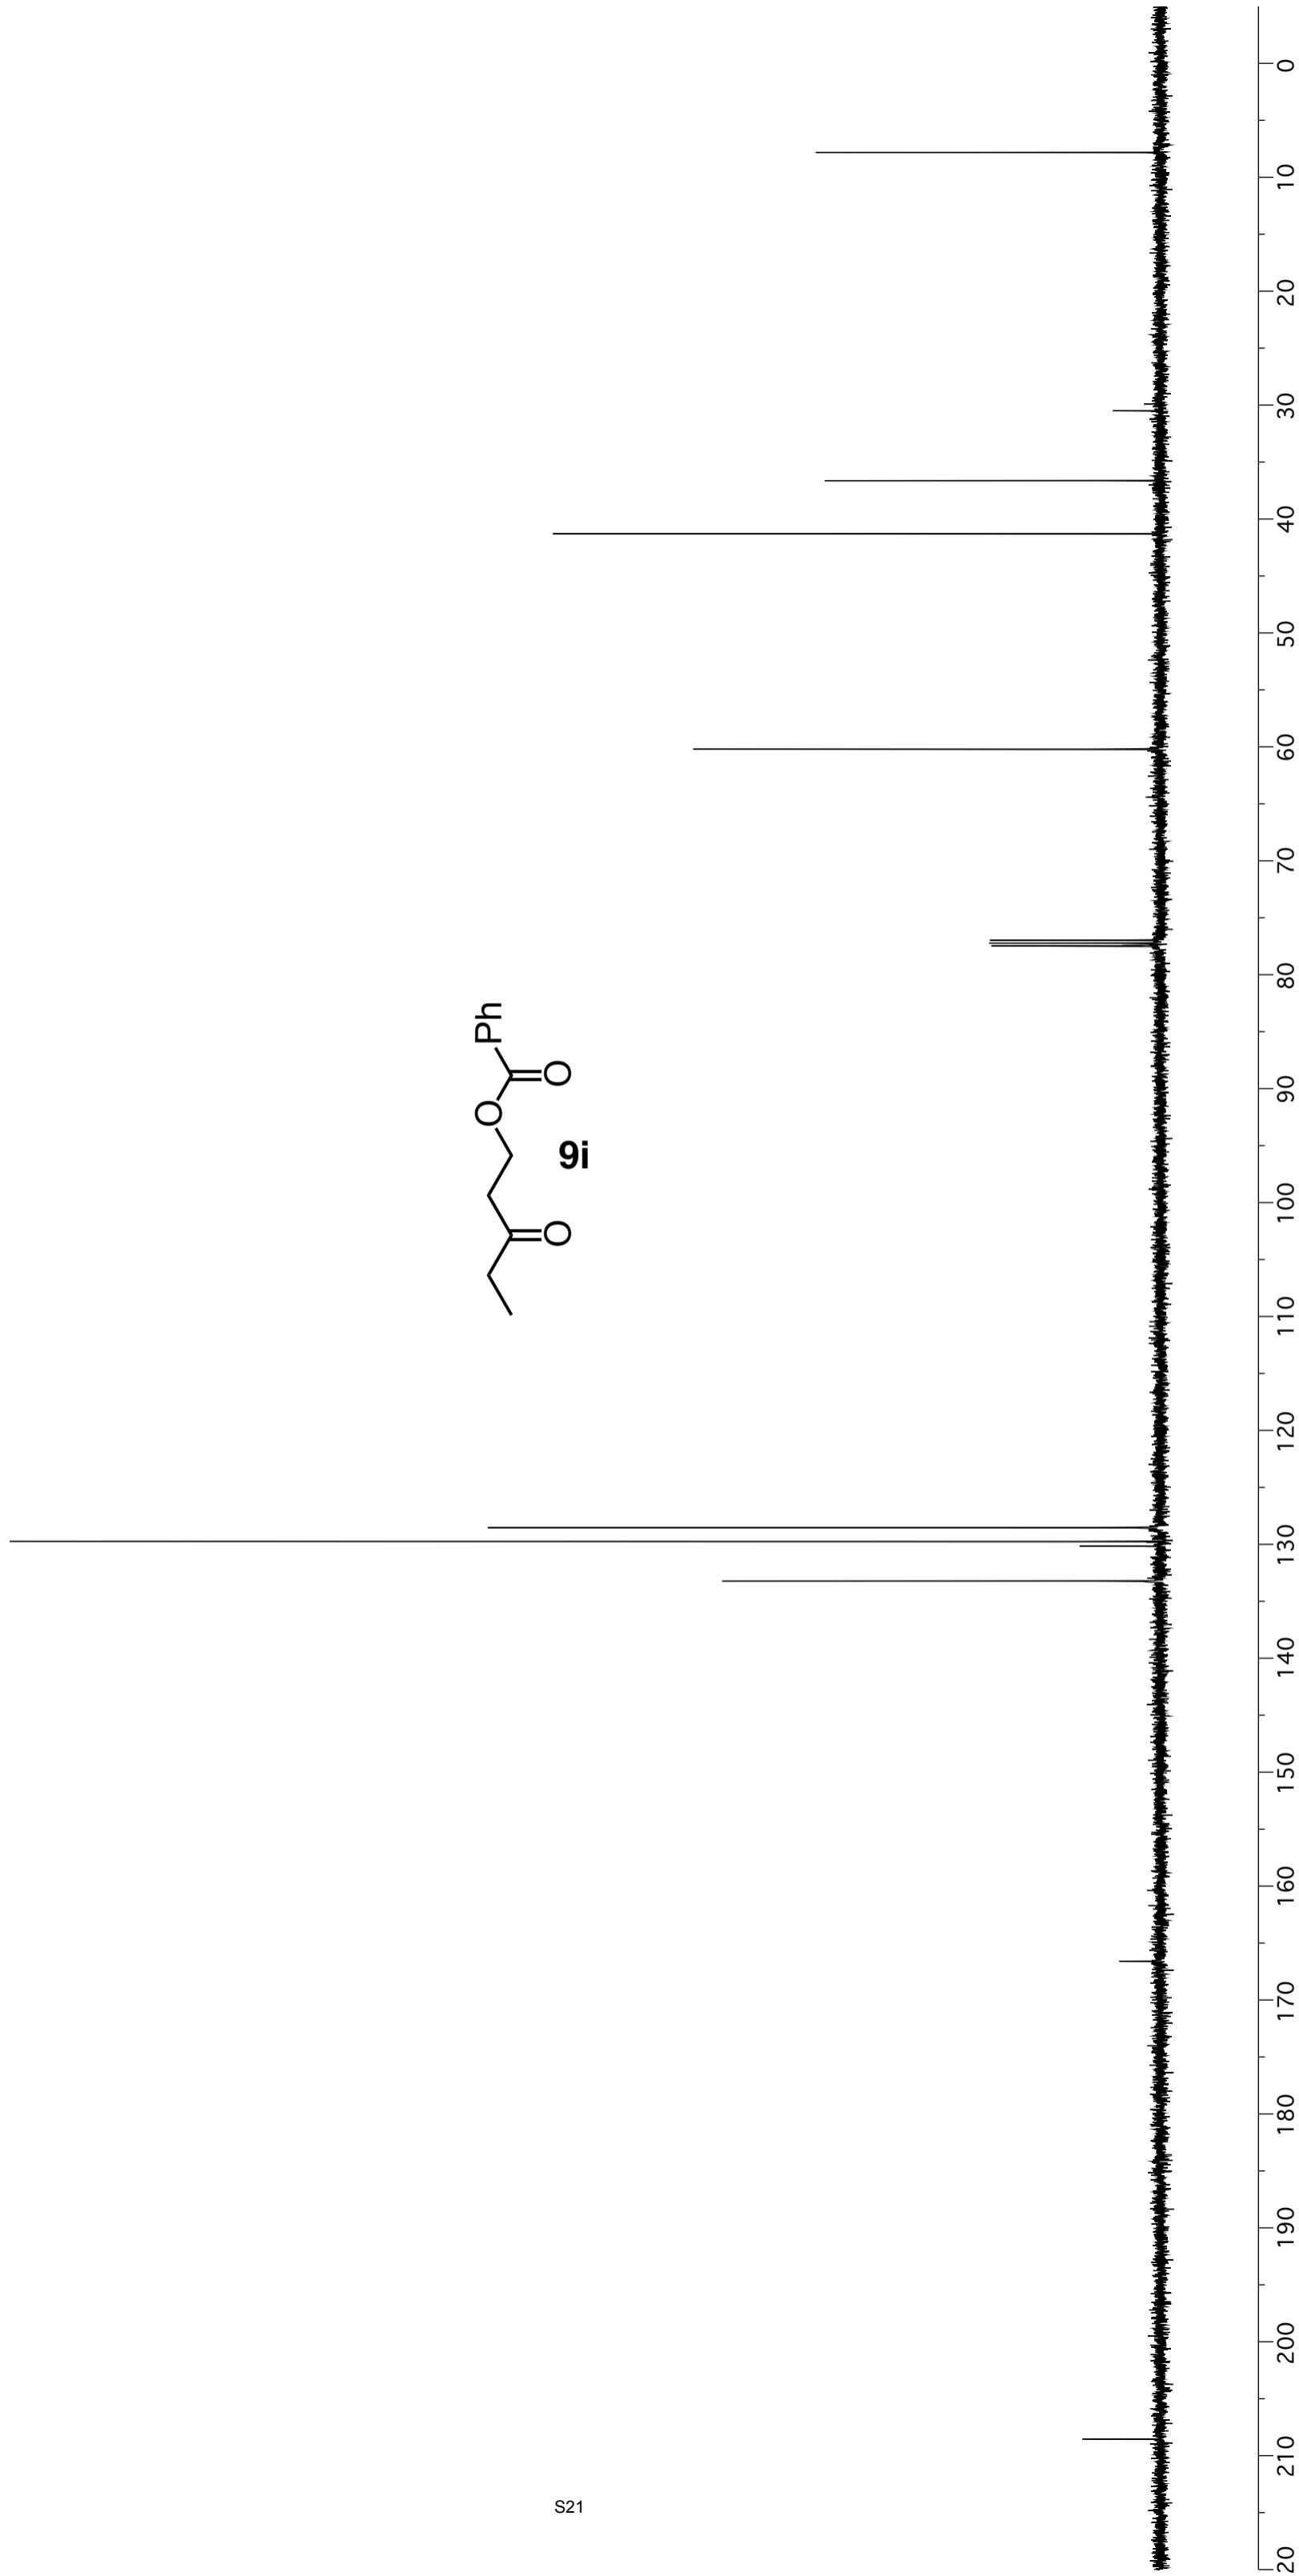

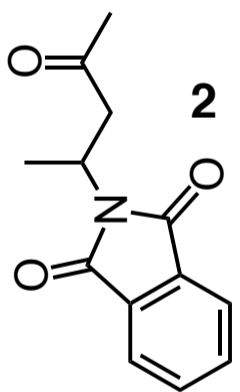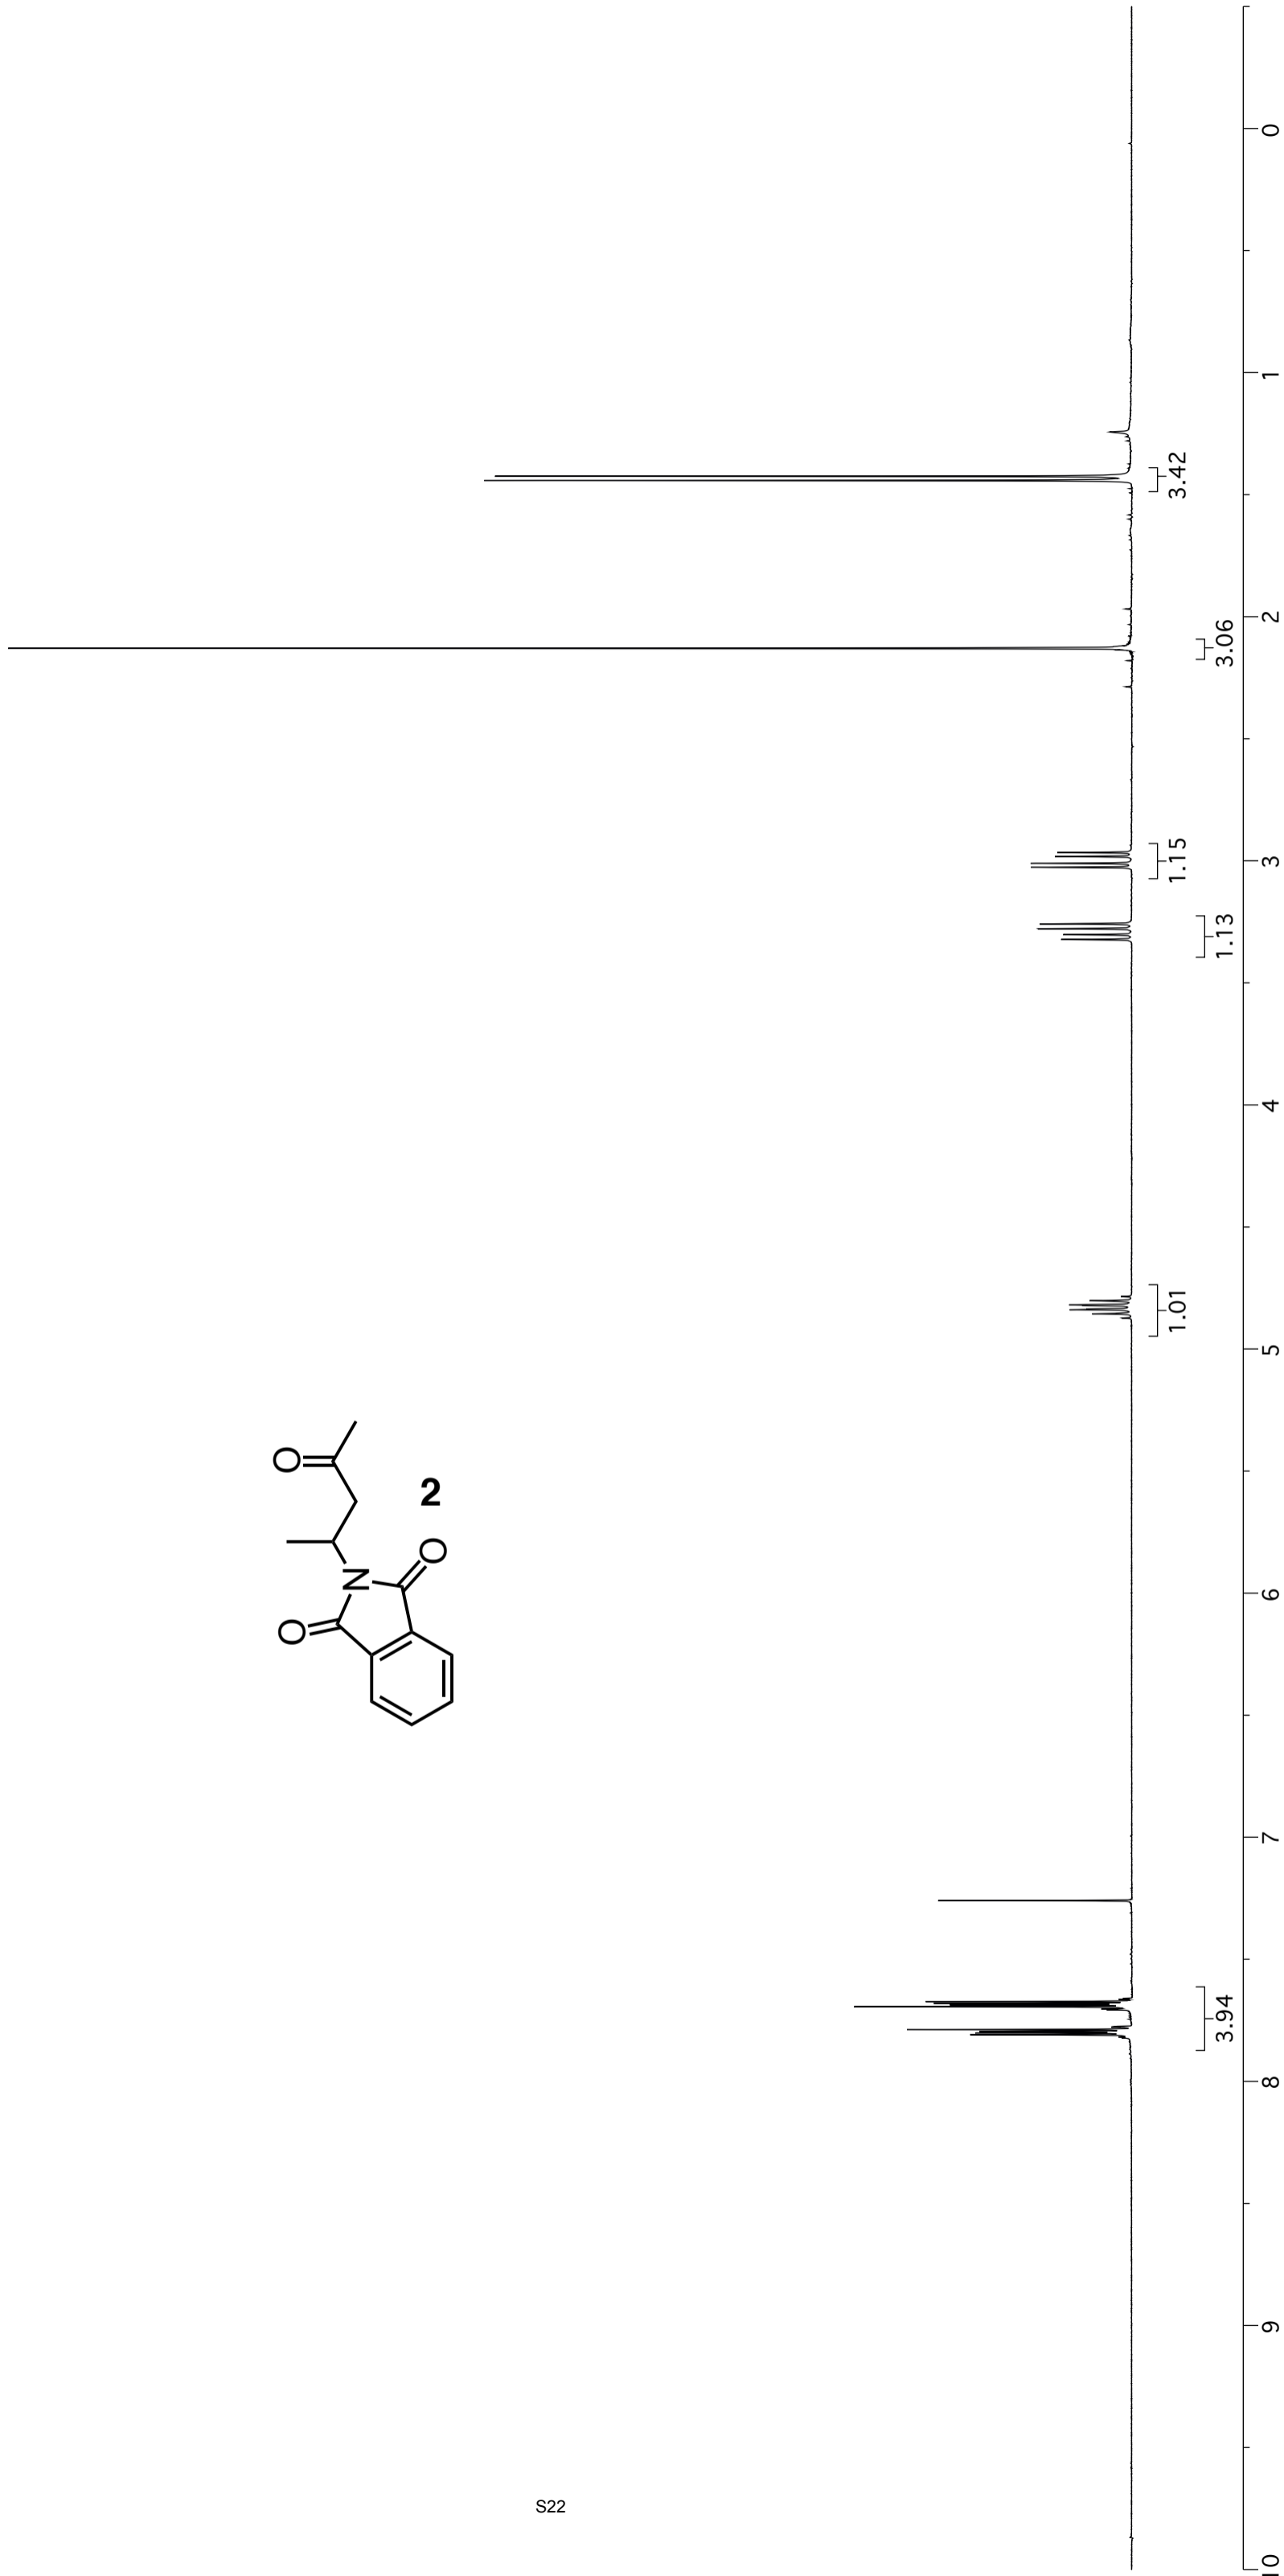

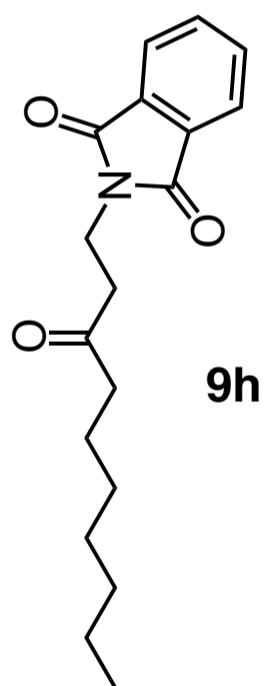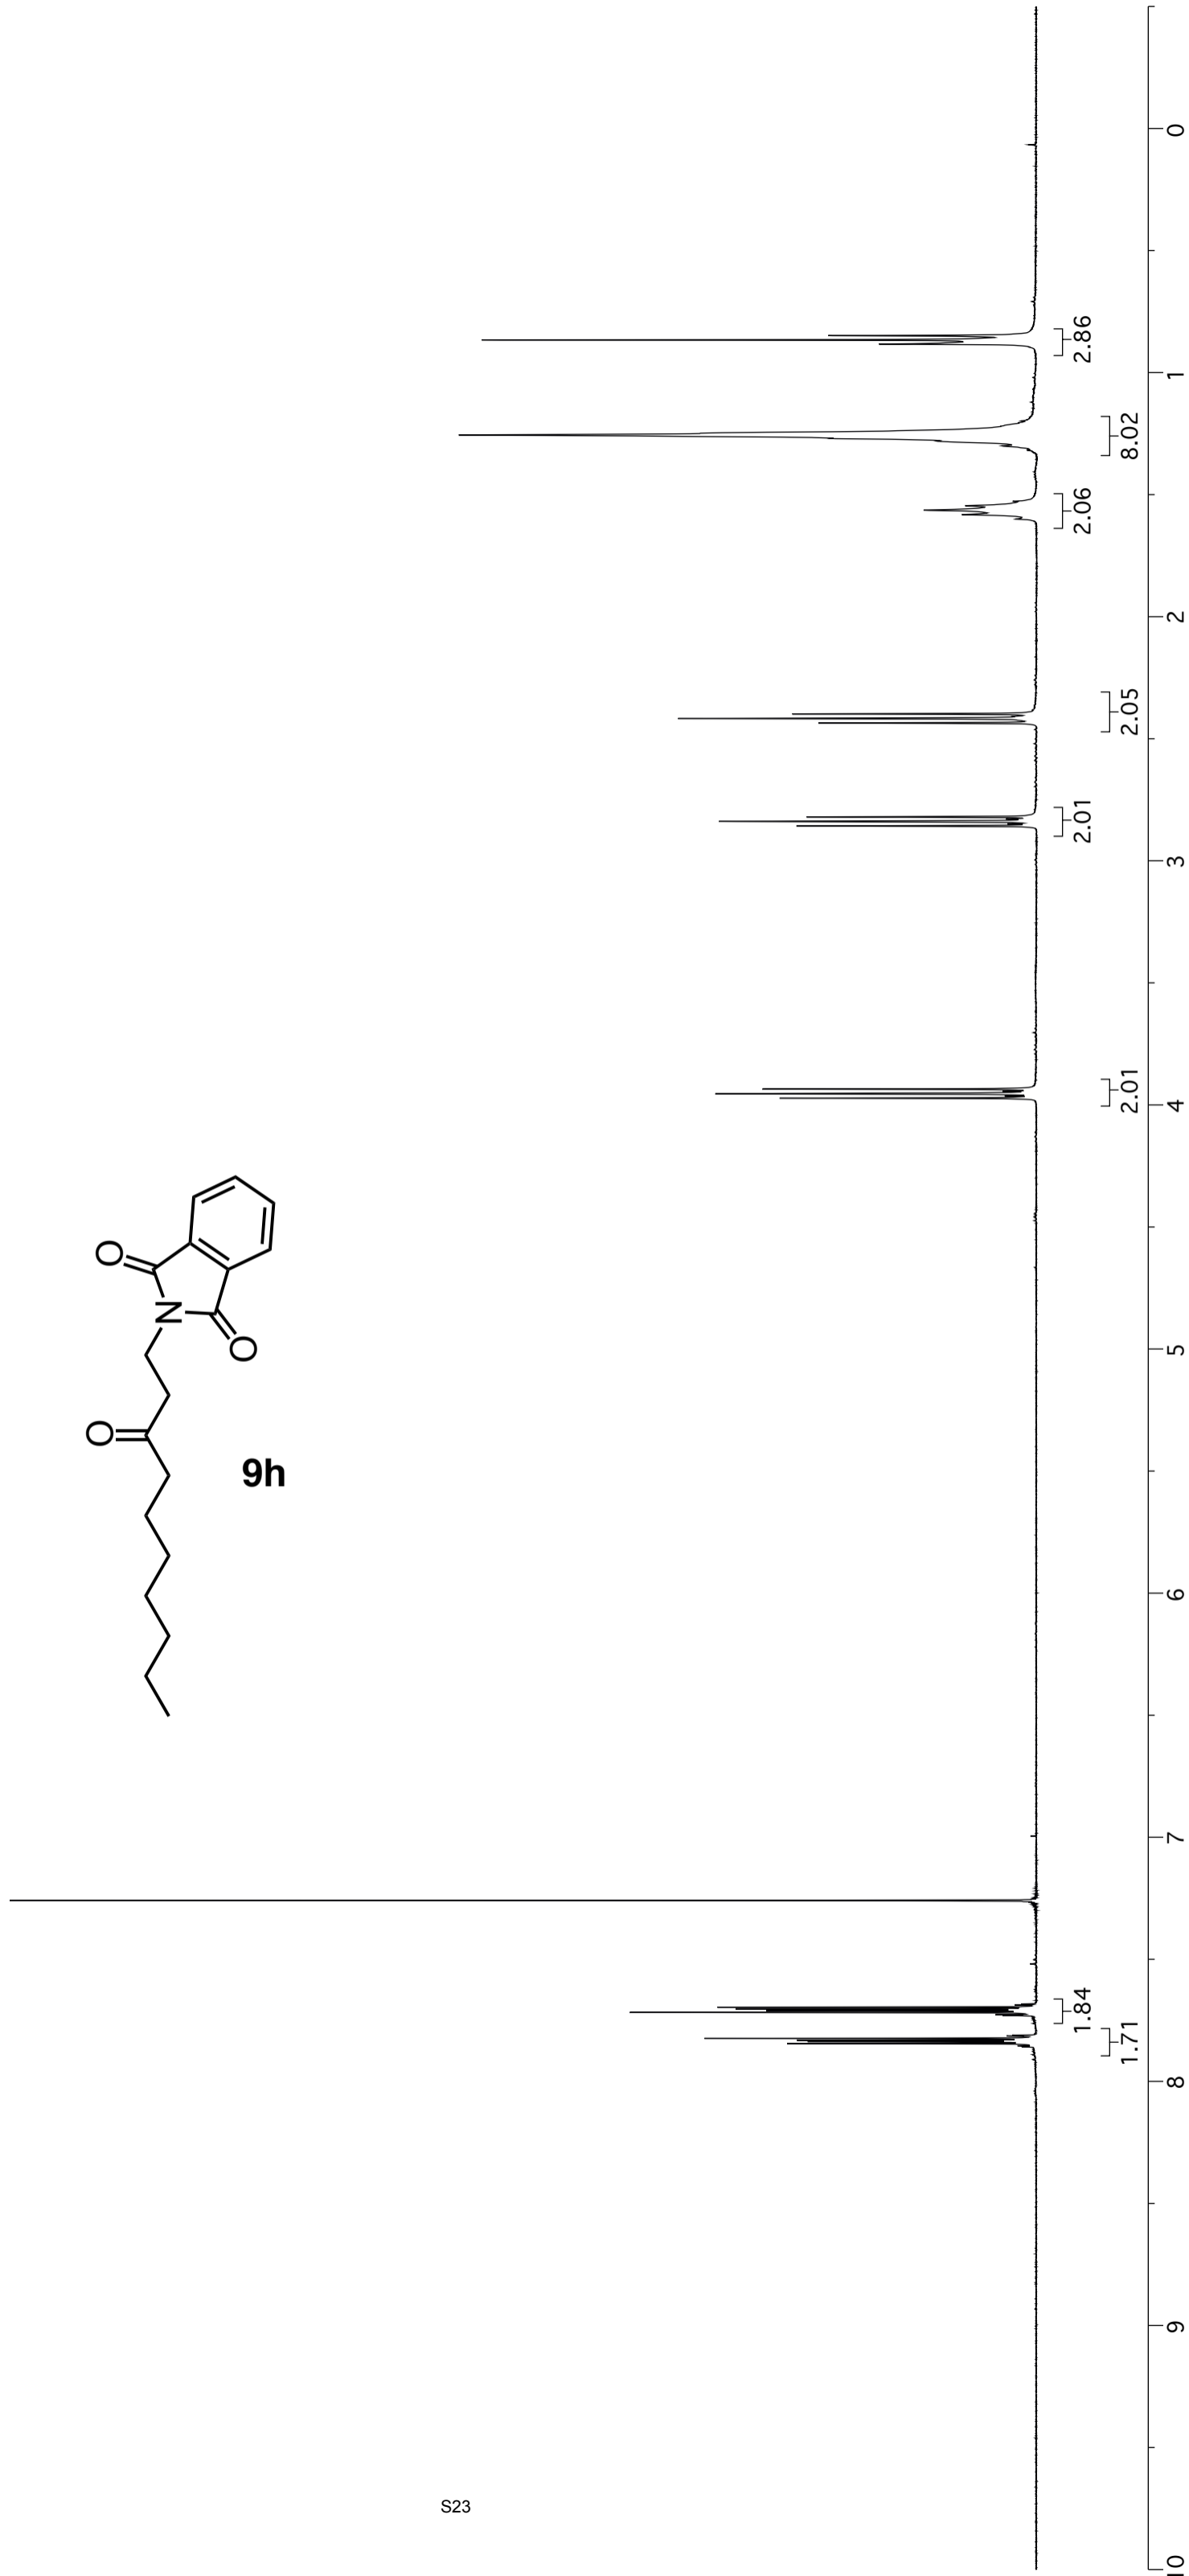

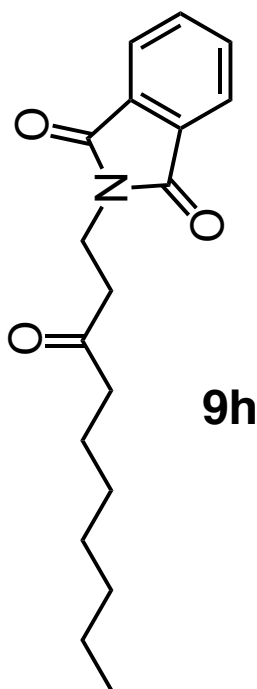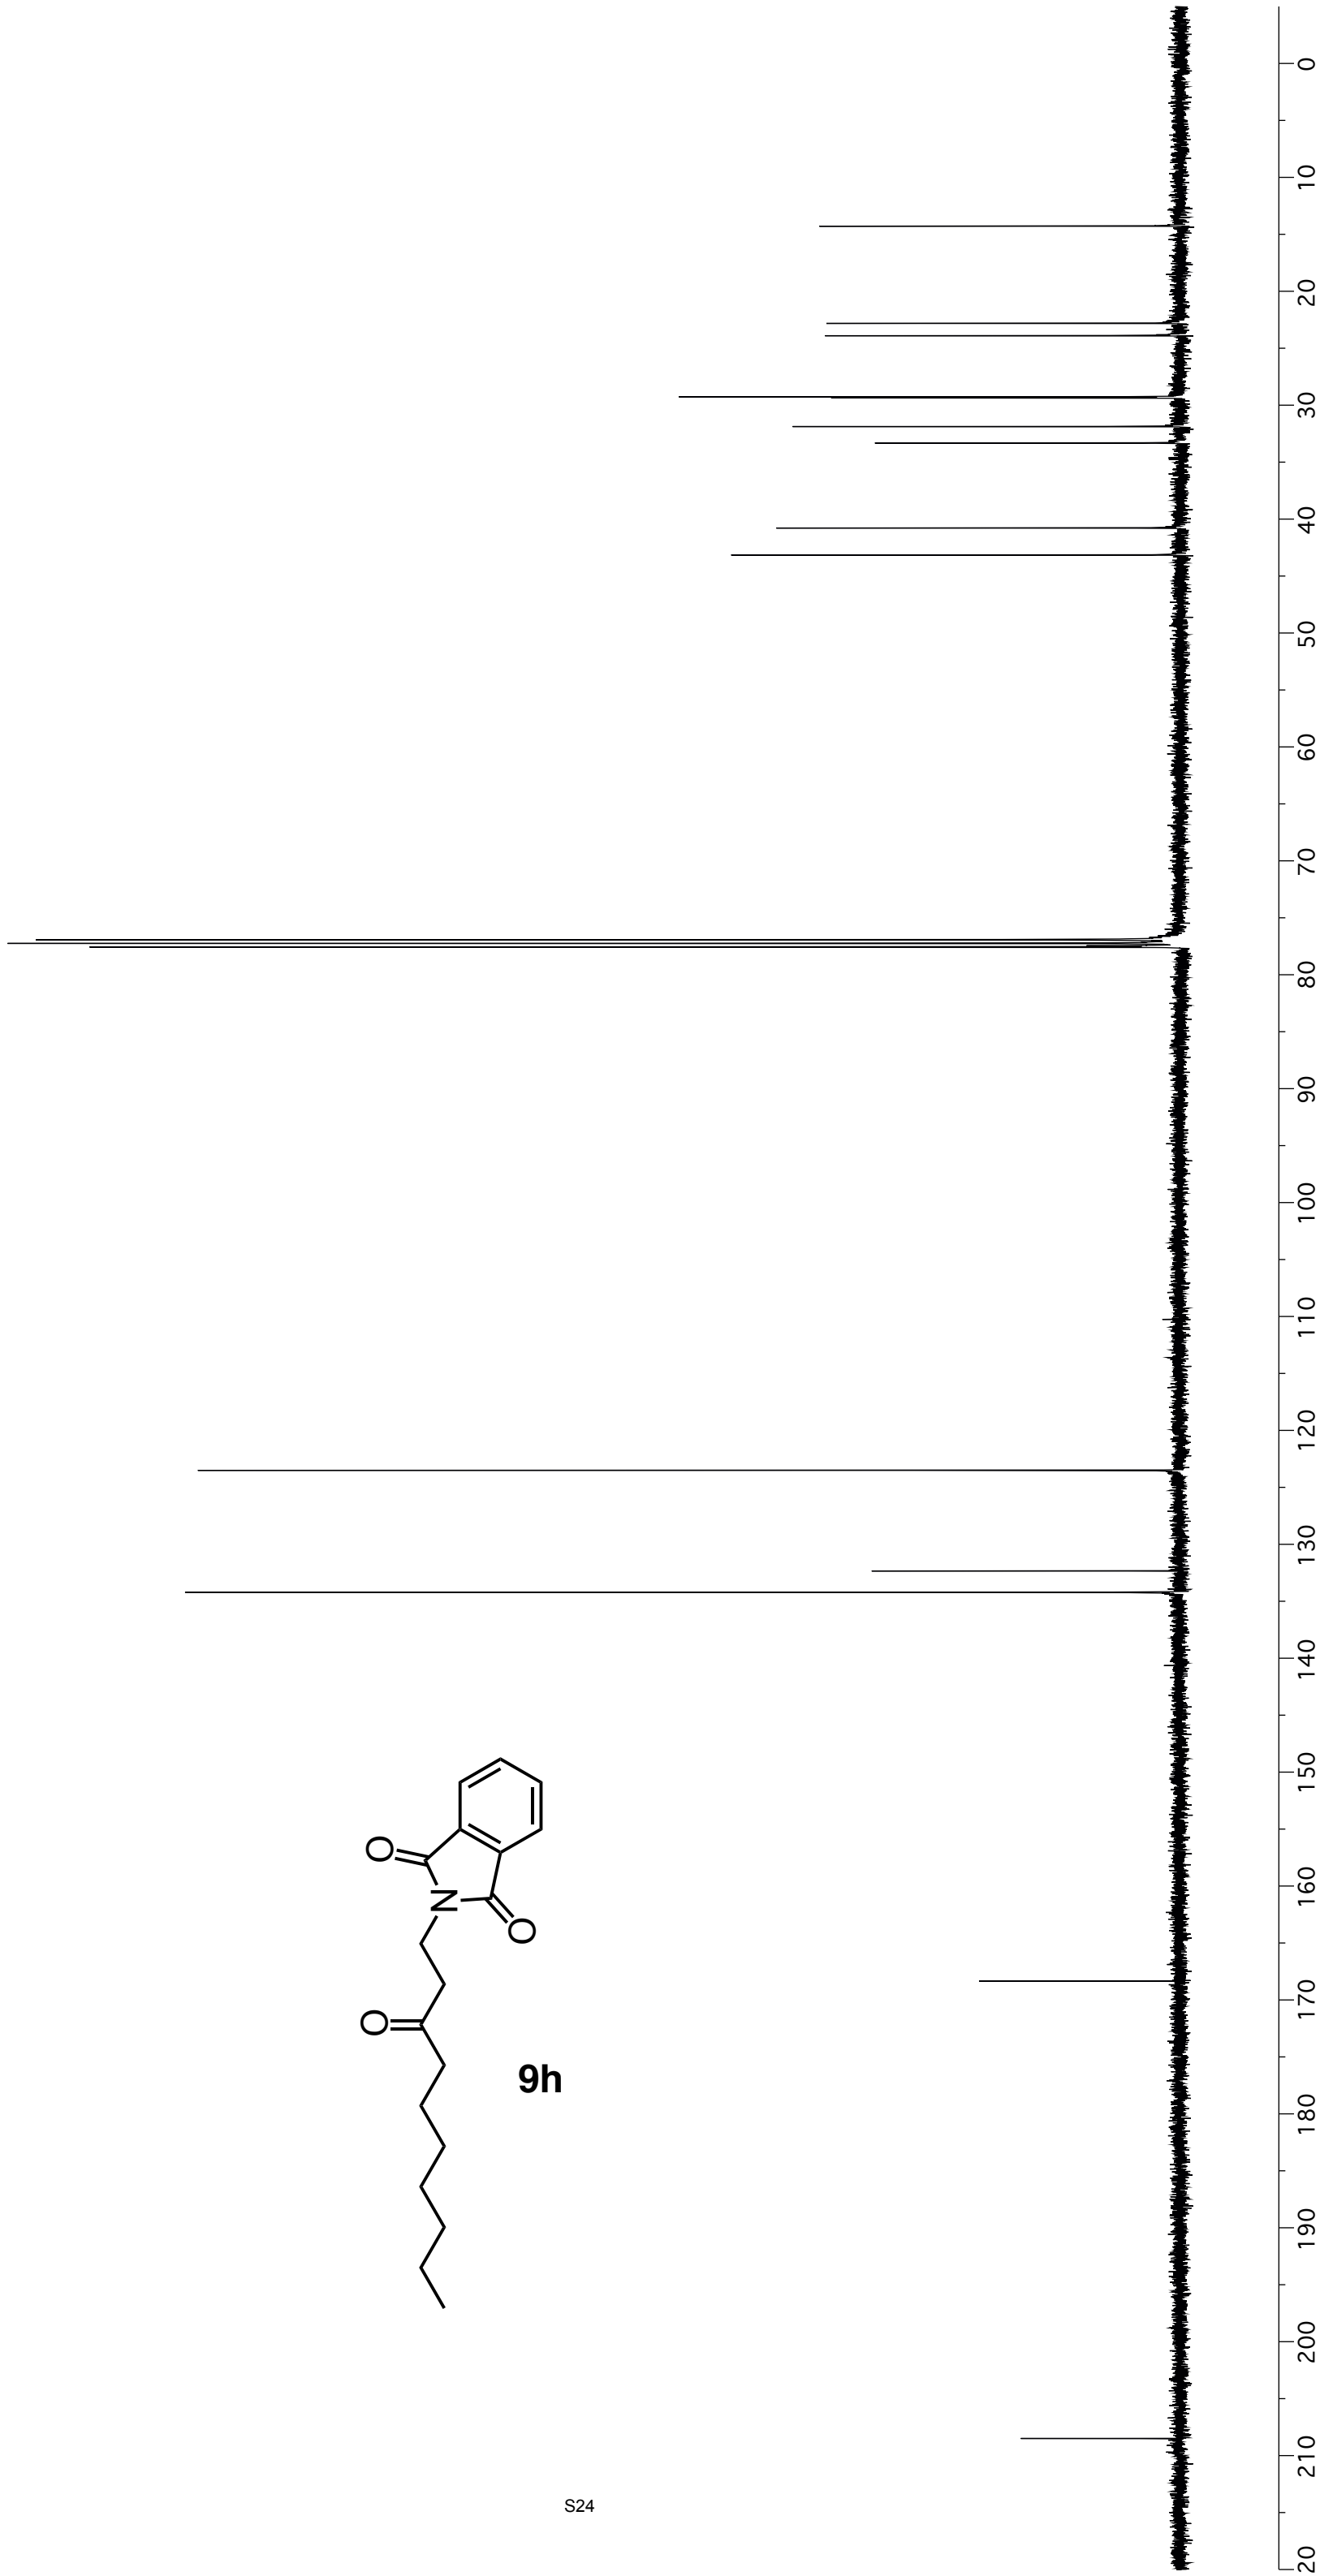



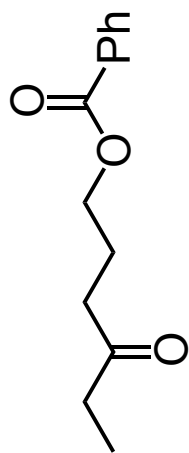

**11**

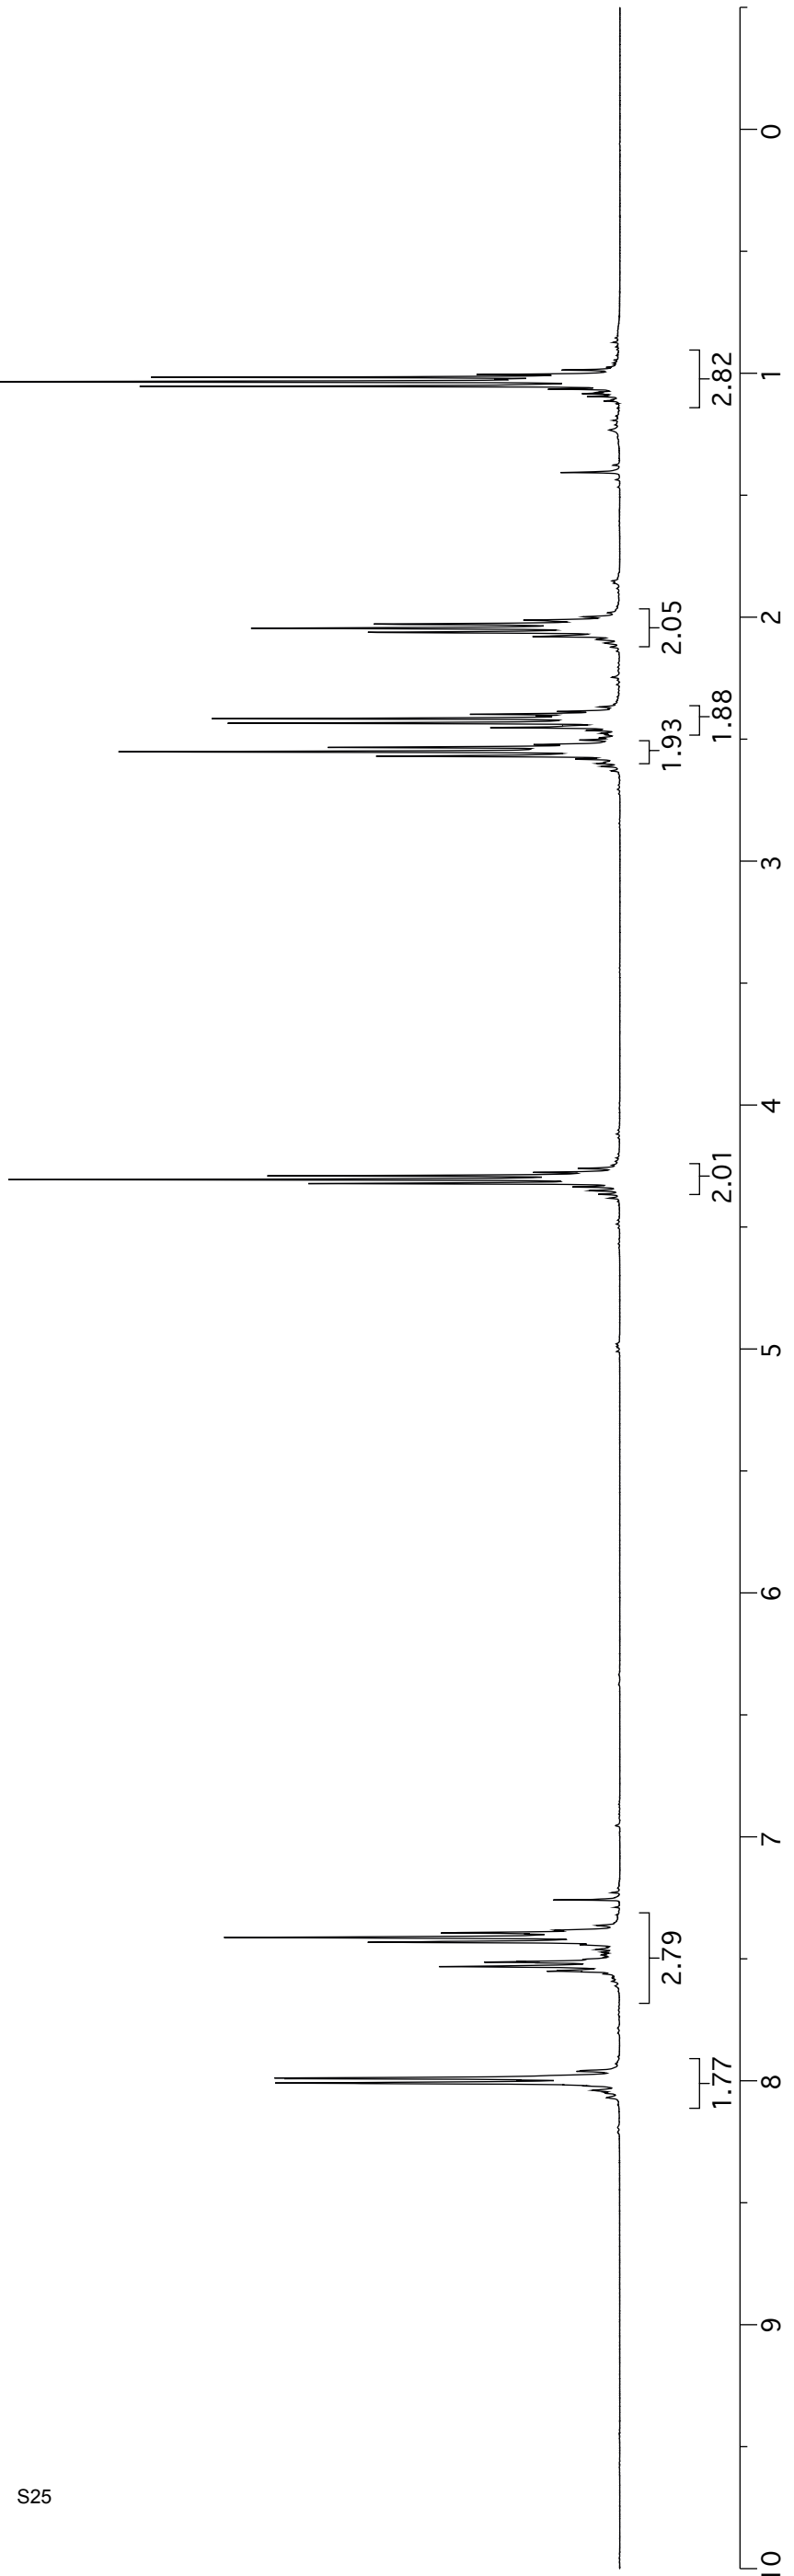

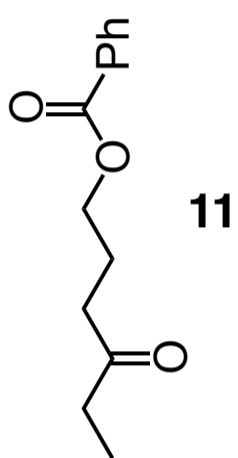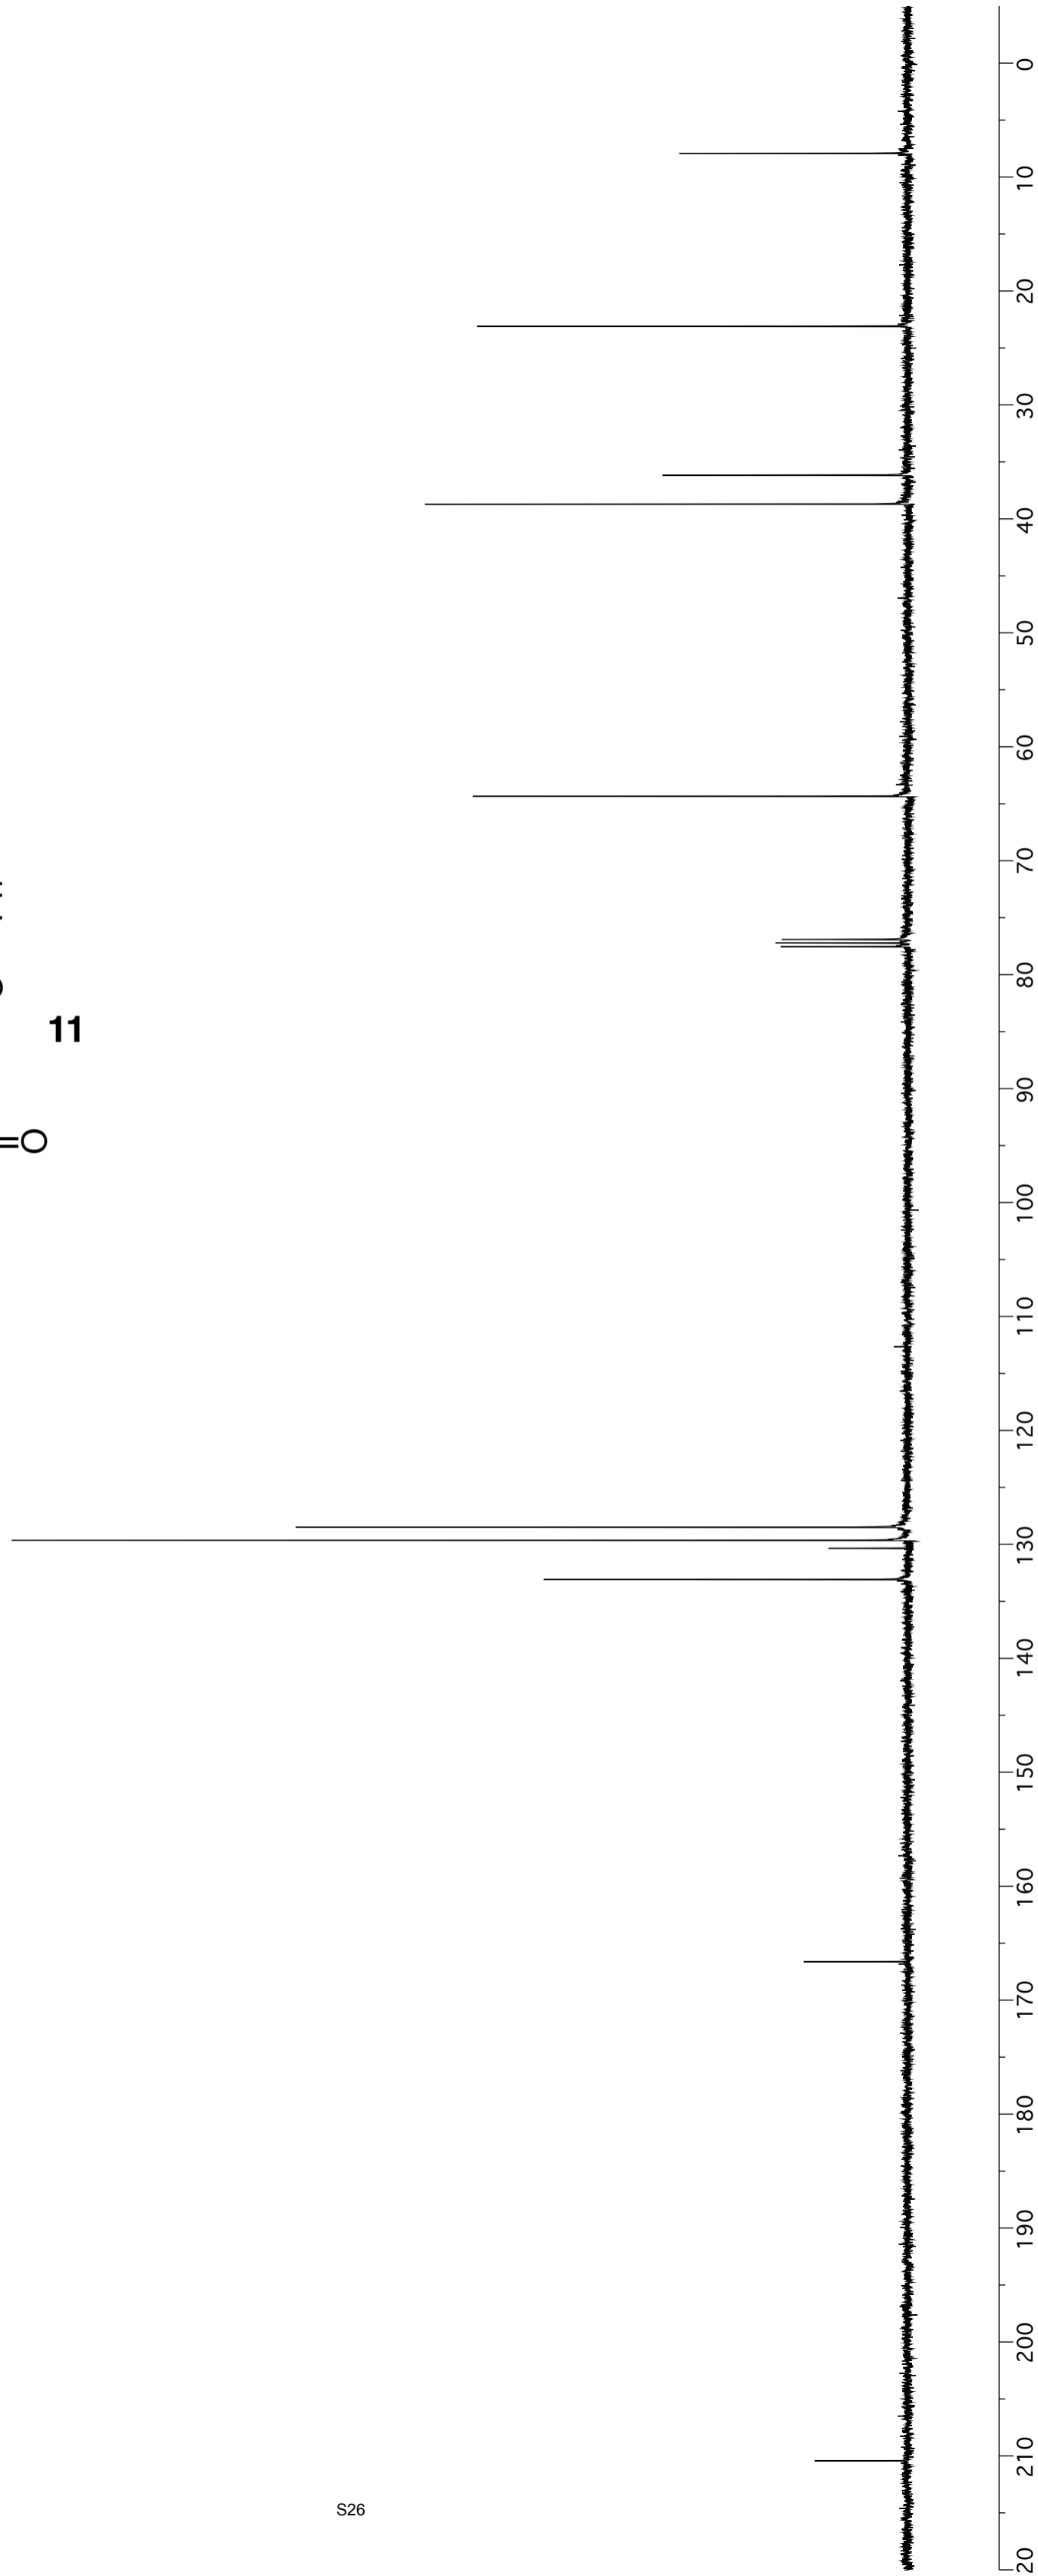

qx-2-192-2-3  
STANDARD PROTON PARAMETERS

1.84  
1.86  
1.88  
2.12  
2.30  
2.46  
2.47  
2.49  
2.58  
2.60  
2.62

7.07  
7.09  
7.11  
7.12  
7.13  
7.14  
7.15  
7.24

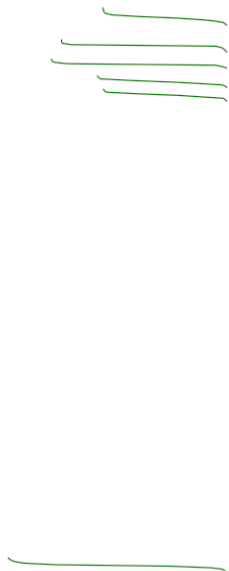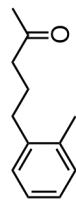

**13**

2.12  
2.82  
3.00  
2.22  
2.11

3.74

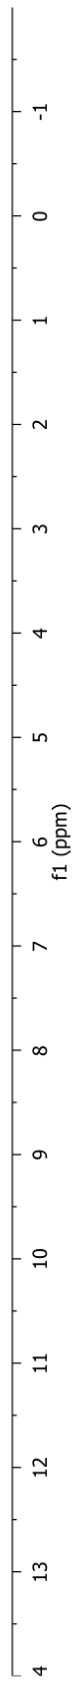

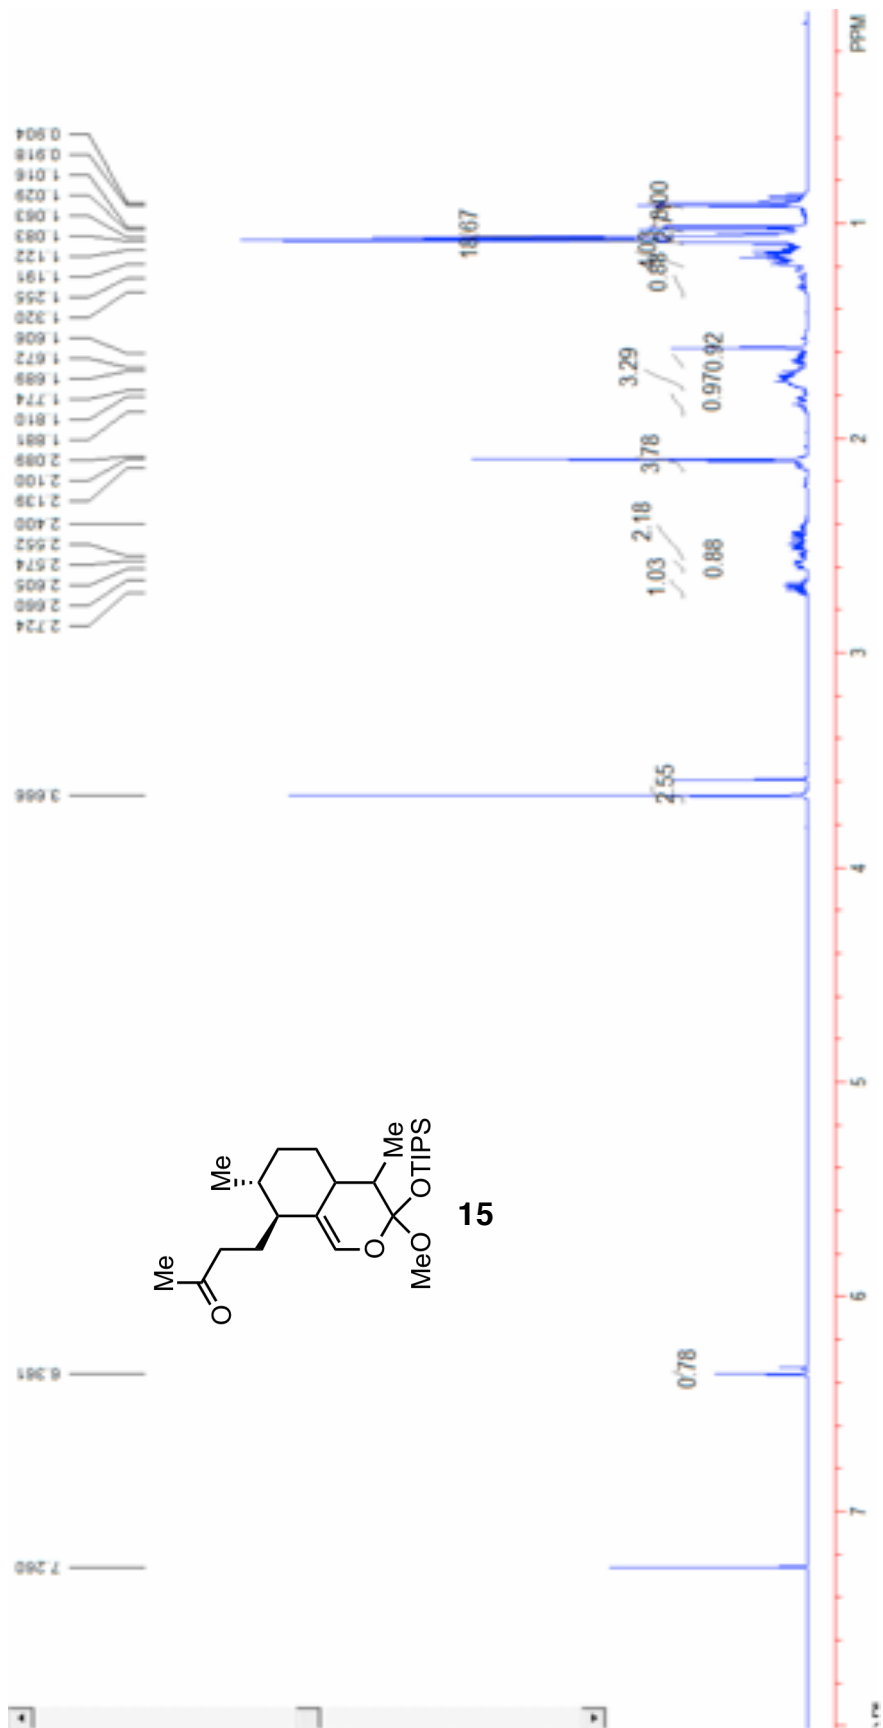

Supplement: NIHMS443678-supplement-1_si_001.pdf [file NIHMS443678-supplement-1_si_001.pdf]
